# Supplementary material for: Regulation of Gene Expression Patterns in Mosquito Reproduction
Source: PLoS Genet. 2015 Aug 14;11(8):e1005450. doi: 10.1371/journal.pgen.1005450 (PMC4537244; doi:10.1371/journal.pgen.1005450)
Supplement: S2 Dataset — (XLSX) [file pgen.1005450.s016.xlsx]

## Sheet: Sheet1
S2 Dataset: Normalized expressions of Early- (EGs), Early-mid- (EMGs), Late-mid- (LMGs) and Late- (LGs) gene transcripts during the nine time points post blood meal
Early Genes (EGs)
Target id	72 PE	3 PBM	6 PBM	12 PBM	18 PBM	24 PBM	36 PBM	48 PBM	60 PBM	72 PBM	Gene Name	Secondary hit
AAEL000001-RA	331.748	758.625	433.483	167.903	134.795	122.813	132.458	163.554	245.767	162.682	bystin_E1
AAEL000020-RA	3441.61	7005.28	10290.1	6657.67	4950.02	3941.56	5036.73	3384.48	3296.76	3150.52	conserved hypothetical protein	AAEL010587-RA conserved hypothetical protein
AAEL000034-RA	717.985	774.019	868.397	546.342	310.957	163.742	323.708	533.419	523.663	596.194	meiotic recombination repair protein 11 (mre11)
AAEL000077-RA	85.354	307.021	597.52	361.424	75.8756	47.7533	58.3496	78.5829	61.2261	64.5326	AA_transpt_E1
AAEL000087-RA	2185.22	3042.07	4269.91	9256.14	8107.77	3555.51	1682.07	1068.46	1276.41	810.171	macroglobulin/complement
AAEL000088-RA	461.028	1470.29	1682.51	1485.88	603.737	296.401	402.684	423.155	494.079	341.452	brefeldin A-sensitive peripheral Golgi protein, putative
AAEL000127-RA	127.978	271.035	353.331	299.558	55.6528	53.1256	132.873	120.624	92.744	84.0052	amp dependent coa ligase
AAEL000160-RA	10642.6	22911.7	15402.6	8612.2	10777.3	9609.95	9645	7395.38	10193.8	12347.1	hypothetical protein
AAEL000163-RA	1939.81	3048.34	2958.03	1951.43	1130.85	1057.66	1645.45	1666.18	1491.4	1625.61	mitochondrial inner membrane protein translocase, 22kD-subunit, putative
AAEL000180-RA	564.773	1081.39	1291.58	1028.42	383.816	343.159	711.437	442.209	559.412	408.518	Mitochondrial ribosomal protein, L17, putative_E2
AAEL000188-RA	173.085	473.561	280.564	131.468	62.3691	74.5167	75.6711	75.5838	138.325	69.3388	elongase, putative
AAEL000199-RA	4858.74	10234.8	15855.2	13127.9	4035.59	1558.48	1647.52	3430.46	3352.17	3623.28	arginyl-tRNA synthetase
AAEL000208-RA	4682.28	11890.1	27711.3	39406	25705.1	11170	3853.65	4247.29	3861.68	3267.7	copii-coated vesicle membrane protein P24
AAEL000231-RA	2825.08	3812.75	3764.99	3141.66	1186.58	889.682	1862.01	1642.27	2296.06	1371.64	oligopeptidase
AAEL000245-RA	1472.87	2157.73	2702.56	4083.36	2363.19	1483.27	1540.33	671.484	1527.53	1124.48	conserved hypothetical protein
AAEL000254-RA	51.6706	70.2423	108.294	138.638	44.6883	46.6075	48.4364	53.3598	51.2212	54.7559	nuclear factor i
AAEL000279-RA	1902.52	2749.66	2277.86	1584.15	622.624	581.078	932.446	929.812	1234.77	1141.86	N-formylmethionylaminoacyl-tRNA deformylase, putative
AAEL000283-RA	52.2911	56.0619	125.622	194.724	71.4231	51.2829	52.1371	47.8117	42.0698	43.9464	galactose-specific C-type lectin, putative
AAEL000284-RA	1447.44	1970.17	1651.19	1245.79	763.994	697.369	1022.93	775.948	754.101	805.706	conserved hypothetical protein
AAEL000286-RA	56.5484	94.7806	86.6356	131.543	100.189	67.4805	94.7127	48.8495	55.7019	49.0608	conserved hypothetical protein
AAEL000293-RA	2415.35	7849.46	12535	14480.3	8677.46	3575.7	2034.03	2002.74	2151.53	1433.92	ebna2 binding protein P100
AAEL000309-RA	490.092	1597.61	2232.34	3200.94	2862.39	2170.28	1636.08	603.594	631.799	303.57	hypothetical protein
AAEL000309-RB	2119.39	4822.35	8005.78	10118.5	8295.47	7058.78	6333.9	2880.95	2722.5	1632.63	hypothetical protein
AAEL000330-RA	426.523	874.987	798.217	802.772	186.498	148.817	226.508	275.237	335.672	308.179	conserved hypothetical protein
AAEL000331-RA	6117.56	8701.91	8497.16	4658.36	3053.78	2745.24	3150.2	3153.59	6796.98	3736.36	elongation factor ts
AAEL000332-RA	2005.57	3909.91	3254.39	2005.01	1266.72	1227.82	2017.38	1529.04	1451.62	1430.09	conserved hypothetical protein
AAEL000337-RA	539.788	573.412	512.893	456.398	136.513	111.636	409.053	370.268	401.594	481.104	hypothetical protein
AAEL000383-RA	100.867	227.021	216.769	112.694	66.7456	63.1814	96.7815	108.012	106.147	98.2698	beta-1,3-galactosyltransferase brn
AAEL000388-RA	5284.7	6981.31	8825.7	5659.76	2228.37	1337.41	854.664	2293.93	3639.88	1951.52	isoleucyl tRNA synthetase
AAEL000407-RA	1322.72	3571.12	9635.18	13203.3	4763.13	1959.04	1894.44	1315.94	1778.42	1659.44	conserved hypothetical protein
AAEL000410-RA	1957.4	4673.39	13073.6	18603.9	8603.61	4116.46	1950.72	1671.18	1514.77	1497.21	glycoprotein 25l
AAEL000413-RA	35.2232	40.7417	41.4132	219.082	39.159	73.1967	39.4186	34.897	35.6991	37.4847	conserved hypothetical protein
AAEL000424-RA	6707.87	7058.25	6628.68	9777.86	9394.89	6534.59	3615.16	5192.56	5899.01	4831.43	leucine aminopeptidase
AAEL000426-RA	102.431	111.639	103.188	196.861	110.141	122.335	166.164	88.1066	102.486	75.5115	hypothetical protein
AAEL000427-RA	1591.08	1651.9	2815.77	3932.04	2851.6	2319.47	720.158	1076	1043.17	1235.79	conserved hypothetical protein
AAEL000444-RA	2660.12	8151.92	15098.5	18364.7	8473.8	2712.06	1674.05	2463.44	2143.7	1648.03	udp-glucose glycoprotein:glucosyltransferase
AAEL000451-RA	13230.6	18903.4	39897	40108.4	19142.8	8877.42	6534.37	11557.4	8006.18	8139.12	beta1,4 mannosyltransferase
AAEL000460-RA	484.137	922.852	886.247	545.896	604.994	228.916	547.775	404.106	346.027	315.54	conserved hypothetical protein
AAEL000470-RA	171.309	391.055	397.743	873.988	282.075	336.769	412.346	153.312	146.76	131.399	hypothetical protein
AAEL000505-RA	233.32	1581.13	2486.23	1614.29	550.478	251.543	858.685	269.453	464.797	254.618	conserved hypothetical protein
AAEL000530-RA	241.946	547.18	216.515	115.654	102.81	86.5513	453.149	193.818	218.868	116.076	carboxylesterase
AAEL000551-RA	37283.4	92696.4	89753.3	80401.6	55768.9	49886.8	15069.9	24750.8	78959.1	35272.9	hypothetical protein
AAEL000559-RA	2375.58	6036.46	14313.9	11714.3	8651.32	6242.59	3027.88	2481.13	2197	1908.92	glycosyl transferase
AAEL000572-RA	625.819	580.056	977.685	1462.79	639.01	617.291	494.497	788.088	609.452	331.999	amp dependent ligase
AAEL000574-RB	1412.08	2717.18	4144.78	4330.93	2382.95	1179.71	1059.06	1025.23	882.145	762.148	conserved hypothetical protein	AAEL000574-RA conserved hypothetical protein
AAEL000626-RA	68.1253	323.115	476.531	241.281	72.3781	203.737	55.3178	55.4395	60.3605	43.8884	hypothetical protein
AAEL000640-RB	1756.23	2534.59	4264.53	8107.97	2251.81	1169.92	2226.17	1576.96	3276.68	1123.25	alanine-glyoxylate aminotransferase
AAEL000641-RB	48011.8	98064	146859	156326	74367.8	21454.4	6291.25	19378	15390.6	9769.16	protein disulfide isomerase	AAEL000641-RA protein disulfide isomerase
AAEL000654-RA	501.479	796.423	1150.03	1329.57	883.374	603.447	710.772	524.09	815.88	519.119	n-acetylgalactosaminyltransferase
AAEL000687-RA	275.634	777.695	1301.15	1734.48	643.726	602.505	292.86	327.014	758.901	512.61	glucosyl/glucuronosyl transferases
AAEL000701-RA	2475.26	4183.49	4477.57	2144.93	1244.7	1130.8	1361.23	2051.99	1806.95	1776.09	50S ribosomal protein L4	DS|0973|AAEL000701|50S ribosomal protein L4|E1; DS|0973|AAEL000701|50S ribosomal protein L4|E1;;
AAEL000713-RA	4397.77	16561.3	42335.8	60284.9	24304.7	6152.03	1498.31	4676.67	3430.06	4251.46	reticulon/nogo
AAEL000720-RA	109.336	195.203	219.537	113.986	57.7062	123.316	124.551	104.201	89.6742	127.636	conserved hypothetical protein
AAEL000746-RA	15426.6	13138.4	34270	50656.8	28128.7	14717.2	5975.68	11445.3	9484.81	16550	NADP-specific isocitrate dehydrogenase B_ORF
AAEL000787-RA	310.916	493.617	325.797	307.379	144.136	133.206	211.05	303.329	250.034	299.464	ubiquitin c-terminal hydrolase x4
AAEL000791-RA	259.772	725.091	1087.14	1403.93	612.547	410.527	487.642	246.364	280.966	203.162	hypothetical protein
AAEL000794-RA	1627.75	3293.93	1681.5	543.239	334.443	524.888	1207.47	1483.03	1923.43	1015.01	eukaryotic translation initiation factor 3 subunit (eif-3)
AAEL000802-RA	603.244	2997.23	3155.12	3209.14	1698.35	954.996	753.42	621.255	688.784	485.965	conserved hypothetical protein
AAEL000804-RB	795.645	1573.09	804.179	641.53	330.837	264.594	472.658	398.845	449.339	473.756	conserved hypothetical protein	AAEL000804-RA conserved hypothetical protein
AAEL000807-RA	434.677	3286.25	5402.19	4733.37	2913.18	1528.04	1066.17	860.089	594.543	302.986	Tetratricopeptide repeat protein, putative
AAEL000825-RA	1389.94	2884.03	3779.6	3353.87	1787.76	1262.7	1201.64	1203.01	1314.06	1371.04	eukaryotic peptide chain release factor gtp-binding subunit (erf2) (translation release factor 3) (erf3) (erf-3)
AAEL000848-RA	1470.65	1849.17	1779.4	1381.88	473.597	337.687	711.612	991.558	819.799	1253.04	poly(a) polymerase
AAEL000852-RA	4020.47	5379.85	7729.73	8050.7	2376.13	1640.26	2493.92	3597.95	2642.68	4260.2	peptidyl-prolyl cis/trans isomerase, putative
AAEL000854-RA	5703.61	6492.96	9082.96	14367.7	10228.4	8134.16	5919.43	6682.18	7922.06	6071.8	fumarylacetoacetate hydrolase
AAEL000864-RA	71.7605	97.9624	104.131	346.048	98.9935	184.95	121.691	77.3111	73.1901	64.8775	sex-determining region y protein, sry
AAEL000901-RA	64.7354	110.114	220.883	439.482	262.742	109.573	86.1005	65.4043	63.136	55.4099	conserved hypothetical protein
AAEL000941-RA	14654.1	22419.8	20266	17672.8	7696.31	5840.05	5873.73	10226.4	10091.4	10897	mitochondrial inner membrane protein translocase, 8kD-subunit, putative
AAEL000943-RA	307.003	837.122	488.458	396.035	295.692	314.449	230.609	256.205	255.504	258.882	conserved hypothetical protein
AAEL000944-RA	2278.14	7143.19	14108.5	14230.6	10926.8	5661.08	2692.22	2855.52	2020.85	1707.81	conserved hypothetical protein
AAEL000947-RA	9239.97	22788.2	44544.8	50088.7	25268.4	11686.2	5173.59	6478.4	5229.43	5370.37	microsomal signal peptidase 23 kd subunit (spc22/23)
AAEL000958-RA	771.422	1288.93	1288.58	1922.59	1755.34	1324.41	825.351	416.267	633.753	508.672	conserved hypothetical protein
AAEL000988-RA	2197.91	5142.76	3320.91	1203.29	438.505	421.604	834.852	1342.35	1529.53	865.92	conserved hypothetical protein
AAEL000996-RA	1111.89	1817.41	1363.17	793.609	273.956	209.114	478.646	696.751	674.52	644.229	conserved hypothetical protein
AAEL001000-RA	265.532	307.279	287.421	299.245	100.285	101.687	56.6472	266.168	174.511	255.817	1-acyl-sn-glycerol-3-phosphate acyltransferase
AAEL001005-RA	9913.61	42435	55829.5	40115.2	10299.8	4675.74	5521.77	16242.1	7695.71	6263.44	calreticulin
AAEL001011-RA	438.783	797.803	1079.16	924.011	713.542	178.367	338.801	422.293	339.999	633.549	conserved hypothetical protein
AAEL001019-RA	1062.74	2062.23	1515.73	799.431	199.087	133.488	330.863	600.744	524.151	544.368	translation elongation factor
AAEL001036-RA	1018.39	1597.37	1068.97	675.982	438.459	409.641	567.966	681.181	601.925	636.362	ikappab kinase complex-associated protein
AAEL001038-RA	750.928	1136.72	1203.68	729.331	351.509	282.084	575.477	598.215	434.427	695.233	cak1
AAEL001044-RA	16579.1	24952.4	28227.4	16941	13478.4	10219.6	6854.6	7028.19	9801.95	6504.8	tyrosyl-tRNA synthetase
AAEL001046-RA	58.7679	288.366	315.996	485.999	371.139	277.227	96.5867	98.4421	100.647	55.489	phosphatase fragment
AAEL001065-RA	409.374	927.714	2217.37	4389.89	3462	2485.65	1719.82	457.139	583.014	346.413	conserved hypothetical protein
AAEL001089-RA	600.165	1666.99	1115.84	430.397	205.225	139.669	367.286	410.957	269.432	376.662	conserved hypothetical protein
AAEL001095-RA	177.419	181.195	207.644	253.551	75.5051	143.465	77.757	145.138	181.704	145.299	hypothetical protein
AAEL001099-RA	284.949	342.368	303.312	305.101	122.094	115.077	93.5585	304.698	247.866	314.023	dead box polypeptide
AAEL001101-RA	7693.2	13713	11148.7	5850.1	2802.31	2178.65	2128.55	4393.56	5372.92	4283.64	atp-dependent transporter
AAEL001102-RA	5572.75	7821.53	7729.38	5116.66	3737.95	2393.91	6163.47	5460.06	5830.33	3257.51	adenosine kinase
AAEL001103-RA	2713.82	3381.83	3484.25	2109.16	1168.23	1364.77	1527.45	1439.94	1411.48	1832.77	prefoldin, subunit, putative
AAEL001109-RA	667.538	1059.47	1359.75	1483.93	423.057	322.887	882.361	539.555	779.052	498.142	glutaredoxin
AAEL001114-RA	144.511	597.46	1101.99	959.835	415.123	103.498	200.863	136.566	130.376	91.5476	AA_transpt_E1-2
AAEL001134-RA	33544.4	100227	116486	78255.6	13382.7	7573.55	5391.03	20613.3	29283.5	19636.5	methylmalonate-semialdehyde dehydrogenase
AAEL001158-RA	25981.4	55121.1	86583.8	56444.8	19251.4	9999.67	3478.37	56798.8	48405.2	46706.9	fructose-1,6-bisphosphatase	AAEL001158-RB fructose-1,6-bisphosphatase
AAEL001163-RA	378.791	1245.41	1779.28	3062.36	1977.46	993.125	793.818	431.763	374.703	181.051	macroglobulin/complement
AAEL001169-RA	63.6078	129.708	73.7703	51.2881	40.3391	36.2464	37.4271	56.5606	49.7965	47.8515	ribosome biogenesis protein bop1_E1
AAEL001176-RA	737.989	1956.47	1605.17	2067.22	1722.65	1194.7	240.286	418.766	432.033	314.086	s-adenosylmethionine decarboxylase
AAEL001177-RA	853.14	3046.1	4550.17	2998.55	1191.4	505.859	561.555	568.373	513.454	604.915	signal recognition particle, 14kD, putative
AAEL001180-RA	197.361	387.885	500.723	769.605	232.923	282.871	323.107	207.25	275.778	370.388	hypothetical protein
AAEL001202-RA	330.881	423.065	536.701	690.071	270.486	221.633	366.843	211.878	203.478	236.415	conserved hypothetical protein
AAEL001218-RA	3720.39	5386.96	5503.71	8486.44	5694.61	3062.18	1111.37	1890.83	4074.66	1407.16	alanyl-tRNA synthetase
AAEL001250-RA	1614.77	2978.02	4731.73	4033.8	1724.33	963.988	1339.5	1528.31	1074.89	980.553	conserved hypothetical protein
AAEL001251-RA	2148.3	3282.16	4121.74	3838.33	2845.27	2764.59	2982.44	2158.68	1555.64	1654.99	nsfl1 cofactor P47	AAEL001251-RB nsfl1 cofactor P47
AAEL001273-RA	1928.62	5201.33	4829.69	4613.99	3475.89	2698.93	2160.91	1881.57	2444.38	2087.1	Sec24B protein, putative
AAEL001275-RA	510.294	1585.9	2361.07	4407.32	3415.62	1555.02	757.148	712.829	901.211	297.503	ef-hand protein nucb1
AAEL001276-RA	55.6289	50.7672	48.4091	188.298	38.7999	48.8509	40.6187	45.5487	47.0603	47.4341	conserved hypothetical protein
AAEL001277-RA	143.867	344.957	414.541	262.711	105.386	63.6161	64.2647	133.796	102.539	124.588	arf gtpase-activating protein
AAEL001280-RA	110.755	236.77	218.962	177.11	46.3415	120.072	81.4453	97.1925	100.934	78.5556	28S ribosomal protein S15, mitochondrial precursor_E1
AAEL001331-RA	2561.14	18087.4	65094.5	43504.8	19406.2	5393.82	2657.52	3033.27	2838.16	1251.9	mannose-1-phosphate guanyltransferase	AAEL001331-RB mannose-1-phosphate guanyltransferase
AAEL001339-RA	552.93	926.423	984.881	869.506	401.673	218.322	486.934	449.138	659.217	477.508	conserved hypothetical protein
AAEL001375-RA	3363.16	4900.62	3825.94	3132.04	1555.89	904.858	617.553	1504.57	2580.34	1168.02	Y-box binding protein
AAEL001400-RA	636.474	2451.47	1243.54	578.497	145.657	85.8485	176.596	356.712	260.638	363.404	DNA-directed RNA polymerases III 12.5 kDa polypeptide, putative
AAEL001405-RA	910.736	1214.01	1894.64	2268.42	1527.46	1155.76	1234.5	866.884	719.044	724.691	clathrin coat assembly protein
AAEL001412-RA	5745.39	13262.7	5636.14	2265.92	1069.09	804.853	980.47	2804.17	1876.3	3052.98	conserved hypothetical protein
AAEL001421-RA	1553.28	6384.88	10252.7	9107.95	5082.59	1750.06	637.253	1053.79	1744.13	565.008	high density lipoprotien binding protein / vigilin
AAEL001427-RA	6696.68	3924.45	4447.85	6832.96	5637.48	5273.87	4849.47	2240.56	7261.26	5671.9	short-chain dehydrogenase
AAEL001428-RA	49.0839	65.1476	72.1439	104.285	62.2936	69.6329	81.3086	48.8591	49.1034	46.6148	transcription factor Hairy, putative
AAEL001431-RA	514.214	1546.05	1151.78	973.354	667.777	675.337	426.586	668.496	513.236	491.518	hypothetical protein
AAEL001432-RA	3749.22	13693.6	24136.6	30026.4	20175.1	7058.56	1400.52	3416.25	2267.73	1850.43	protein disulfide isomerase
AAEL001439-RA	2633.59	3573.29	4158.46	3023.65	1468.82	1297.99	1641.21	2212.26	1527.59	1354.17	Mitochondrial ribosomal protein, L22, putative_E1
AAEL001485-RA	72.8753	123.615	124.633	304.809	109.192	74.5106	183.73	89.8555	94.497	62.9352	conserved hypothetical protein
AAEL001516-RA	499.605	2384.62	3388.3	3676.77	1604.11	596.771	479.205	466.208	565.227	460.591	vesicle associated protein, putative	AAEL001516-RB vesicle associated protein, putative
AAEL001541-RA	1036.49	1844.41	3286.45	4080.79	2078.19	1205.65	1146.32	931.746	1064.57	807.715	component of oligomeric golgi complex
AAEL001565-RA	457.464	1594.84	2753.27	4351.55	2532.68	1502.6	1548.06	381.944	953.396	291.159	peptidyl-glycine alpha-amidating monooxygenase
AAEL001573-RA	1036.63	1642.37	1923.82	1988.87	1142.48	669.645	860.044	773.256	1106.38	849.318	conserved hypothetical protein
AAEL001580-RA	631.046	1073.72	1324.64	705.102	304.693	158.844	267.749	514.42	489.188	613.812	otefin, putative
AAEL001596-RA	2119.05	3436.49	7334.59	11930.3	6516.88	3280.37	2348.79	1976.59	1847.02	1713.97	conserved hypothetical protein
AAEL001616-RA	201.117	452.365	584.982	405.151	258.415	174.784	239.239	327.809	302.917	299.026	vesicular-fusion protein nsf
AAEL001627-RA	617.928	1446.74	4218.44	5286.75	3018.64	1228.97	256.25	791.514	593.73	876.681	udp-n-acteylglucosamine pyrophosphorylase
AAEL001649-RA	5025.12	7892.42	9730.52	9828.64	3868.46	3302.4	3649.33	3914.15	3047.74	2798.48	leucine aminopeptidase
AAEL001670-RA	683.247	1423.75	2847.06	2851.88	1397.16	762.658	737.321	620.526	492.435	553.372	conserved hypothetical protein
AAEL001671-RA	65.8137	166.859	191.363	125.415	80.087	68.2924	175.863	83.7341	66.7101	54.3791	hypothetical protein
AAEL001682-RA	296.712	776.568	616.809	456.539	107.435	120.255	323.25	233.661	236.569	240.205	nuclear movement protein nudc_E2
AAEL001705-RA	14499.7	24280.5	60367	46696.5	21228.8	12326.8	11291.5	11163.7	10212.3	12438.5	odorant response protein ODR-4, putative
AAEL001709-RA	293.878	362.488	446.641	407.506	259.879	128.656	145.422	294.07	288.772	226.183	adaptin, alpha/gamma/epsilon
AAEL001719-RA	377.765	557.639	364.176	318.532	211.441	221.123	362.838	333.208	322.84	306.764	atp-dependent rna helicase
AAEL001725-RA	1588.05	1616.79	2147.28	1786.12	1081.54	803.45	959.386	1447.12	1420.99	1371.62	conserved hypothetical protein
AAEL001752-RA	115.102	206.137	366.732	497.737	268.608	107.99	111.612	125.442	112.378	109.776	chloride channel protein 3
AAEL001752-RB	387.81	708.61	1133.12	1644.47	1132.96	782.742	455.803	459.798	500.178	595.757	chloride channel protein 3
AAEL001767-RB	315.922	2290.83	8356.57	11450.1	7146.58	1805.05	189.513	466.939	211.406	201.865	conserved hypothetical protein
AAEL001767-RC	666.743	3201.21	7079.11	8786.46	4926.93	1623.64	746.497	654.158	571.927	7211.26	conserved hypothetical protein	AAEL001767-RA conserved hypothetical protein
AAEL001768-RA	1590.18	3847.53	10456.5	10718.9	6136.68	3436.55	2972.02	1573.4	1613.16	1153.49	short-chain dehydrogenase
AAEL001776-RA	47.108	77.2408	59.1259	153.248	54.5844	58.632	50.3209	47.7025	51.6303	44.89	hypothetical protein
AAEL001779-RA	4693.47	6932.57	12758.1	10680.9	9525.01	7191.05	6269.63	5592.73	6785.44	7583.83	bax inhibitor
AAEL001787-RA	367.129	599.474	352.28	299.974	341.687	337.386	360.472	211.811	260.643	199.874	dna photolyase
AAEL001793-RA	301.955	4109.3	6379.91	13350.5	7940.31	3982.4	590.201	244.548	279.929	132.553	conserved hypothetical protein
AAEL001795-RA	34528.9	38107.6	23915.1	14073.8	5468.07	5108.59	2811.11	5486.5	8762.87	9640.29	orfY, putative
AAEL001800-RB	514.595	1013.8	366.563	187.249	121.71	321.414	403.157	285.283	313.218	281.323	hsp70 binding protein
AAEL001806-RA	2206.62	27280	39460.1	57270.2	33922.2	19359.6	3505.54	1998.01	1714.16	1138.99	conserved hypothetical protein	AAEL010280-RA conserved hypothetical protein
AAEL001825-RA	51.1668	137.908	207.725	124.591	93.0056	60.1976	108.098	64.4791	63.1671	60.6984	hypothetical protein
AAEL001827-RA	651.644	969.997	807.239	591.161	502.336	254.797	666.712	610.17	453.037	592.999	ubiquitin specific protease 39 and snrnp assembly factor
AAEL001833-RA	995.628	1692.28	2475.37	4434.28	2384.77	1555.01	391.563	586.984	537.289	613.033	Juvenile hormone-inducible protein, putative
AAEL001859-RA	1873.71	6384.1	13223.4	6681.64	3142.17	1853.06	1665.97	1674.36	1540.93	1915.78	vesicle protein sorting-associated
AAEL001865-RB	2504.05	3071.22	3870.67	5845.29	3691	2183.77	2142.97	2014.4	2773.31	1962	NADH dehydrogenase, putative	AAEL001865-RA NADH dehydrogenase, putative
AAEL001866-RA	32675.2	48307.6	24097.3	8173.14	8163.56	10079.5	25030.5	11307.1	10608.5	12268.9	hypothetical protein
AAEL001869-RA	1011	4288.77	2128.18	869.647	799.318	751.327	1049.65	948.888	844.761	682.988	gmp synthase
AAEL001872-RA	28168.7	43100.4	54902.5	56123.4	21985.2	11695.7	10024.6	24201.2	15456.4	28284	voltage-dependent anion-selective channel
AAEL001887-RA	116.966	931.674	895.247	765.357	500.368	523.849	204.661	110.919	162.574	125.136	glutamine synthetase 1, 2_E1
AAEL001887-RB	3388.37	29045.5	22147.3	17873.2	12201.5	9119.1	2896.18	3390.41	4047.41	2174.47	glutamine synthetase 1, 2 (glutamate-amonia ligase) (gs)	AAEL001887-RA glutamine synthetase 1, 2 (glutamate-amonia ligase) (gs)
AAEL001912-RA	45.5884	52.674	57.5057	328.131	54.4249	52.5346	66.8557	54.2853	54.3846	44.8614	AaegFOXG_E1
AAEL001916-RA	9296.57	8735.99	11291.3	7500.44	4491.72	3045.75	2348.99	7357.64	5416.95	7612.05	EUKARYOTIC_TRANSLATIONAL_INITIATION_FACTOR_4E_ORF
AAEL001926-RA	236.359	522.203	558.135	293.461	81.0868	76.0198	264.804	187.534	188.161	154.938	Mitochondrial ribosomal protein, S34, putative_E1
AAEL001930-RB	2611.53	7631.26	21916	21951.8	10226.2	5105.33	4628.52	4106.39	3778.98	2251.95	pra1 protein	AAEL001930-RA pra1 protein
AAEL001931-RA	581.41	1007.8	1158.02	1149.78	752.369	721.874	949.604	553.645	548.829	437.107	o-sialoglycoprotein endopeptidase
AAEL001944-RA	735.338	1744.55	3410.14	4704.32	2620.05	1266.2	926.764	518.584	695.371	563.527	conserved hypothetical protein	AAEL011938-RA conserved hypothetical protein
AAEL001955-RA	3733.24	4277.33	6237.95	4935.25	2899.86	2258.69	2717.68	2604.88	2036.73	2872.39	conserved hypothetical protein
AAEL001968-RA	1229.14	2702.85	7857.12	10167.8	3985.43	1308.98	894.749	1481.05	912.663	1349.95	Zinc_transpt_E1
AAEL001968-RB	5170.44	7697.18	23306.3	29126.3	9995.3	3595.41	2521.29	5953.54	3343.34	6978.61	zinc transporter	AAEL001968-RA zinc transporter
AAEL002002-RA	339.53	796.34	737.879	457.656	115.393	82.017	223.136	239.89	176.274	133.943	Mitochondrial ribosomal protein, S18B, putative_E1
AAEL002010-RA	2592.22	7790.04	4759.47	4924.7	3542.53	2727.35	1651.35	2082	2815.93	1865.24	conserved hypothetical protein
AAEL002014-RA	5685.28	8202.28	8029.31	3759.15	2109.19	1667.91	3103.05	4301.99	3351.96	2563.45	conserved hypothetical protein
AAEL002019-RA	1079.48	1620.82	2057.57	1499.49	914.728	703.266	990.37	1200.83	1096.1	1170.17	conserved hypothetical protein
AAEL002020-RA	3602.14	3566.36	6268.14	6972.66	3125.68	2348.16	1835.23	3079.69	2240.56	3689.76	hypothetical protein
AAEL002023-RA	40750	48884.7	46321.6	78203.1	66824.9	28073.2	10825.8	35216	46372.2	38044.7	imaginal disc growth factor
AAEL002025-RA	1895.03	1952.49	3532.83	4198.83	1840.5	1325.34	1052.68	1672.22	1232.01	1747.9	conserved hypothetical protein
AAEL002061-RA	446.378	1441.03	2385.5	1955.2	614.758	418.096	384.748	500.26	405.269	297.813	cation-transporting atpase 13a1 (g-box binding protein)
AAEL002063-RA	134.132	774.513	537.353	314.267	82.6496	180.555	66.2527	106	87.3754	86.5188	AA_transpt_E3	IH|0845|VB|AAEL008406|AA_transpt|E2; IH|0193|VB|AAEL002063|AA_transpt|E3; IH|0845|VB|AAEL008406|AA_transpt|E2
AAEL002086-RA	2595.71	2269.59	5338.19	7224.73	3221.52	1349.79	717.537	2044.93	1241.67	2607.7	er lumen protein retaining receptor
AAEL002097-RB	641.089	1225.42	2160.8	2500.37	1698.73	1251.84	978.516	637.159	667.455	631.113	conserved hypothetical protein	AAEL002097-RA conserved hypothetical protein
AAEL002102-RA	645.348	2239.25	3286.76	2993.81	1795.32	790.418	578.288	645.824	649.567	491.187	conserved hypothetical protein
AAEL002174-RA	8065.56	32180	59816.1	80647.7	38715.9	9663.85	3437.87	6650.85	6313.76	5141.03	dolichyl-diphosphooligosaccharide protein glycosyltransferase
AAEL002183-RA	6370.45	17500	37326.7	57917.8	26376.7	11687.8	5121.6	4405.59	6127.3	5283.37	oligosaccharyl transferase, subunit, putative
AAEL002186-RA	1217.27	1761.1	1127.29	753.584	491.809	637.116	530.546	596.829	698.663	557.388	conserved hypothetical protein
AAEL002198-RA	2538.87	4223.84	10339.4	12918.1	6821.54	3149.53	2558.27	2092	1809.98	2135.87	conserved hypothetical protein
AAEL002255-RA	110.89	372.188	394.505	493.895	440.428	416.966	324.771	82.3943	95.0273	83.3512	conserved hypothetical protein
AAEL002269-RA	4738.35	58947.3	38359	26305.3	25961.7	16100.9	10566.5	9351.08	22765.4	17858.3	purine nucleoside phosphorylase
AAEL002301-RA	2197.36	3182.54	3037.43	5579.25	5690.98	3781.57	3267.97	2082.95	2976.84	1461.66	serine protease
AAEL002341-RA	394.39	486.817	701.866	475.723	423.08	126.747	496.153	262.831	272.087	392.365	conserved hypothetical protein
AAEL002349-RA	621.672	2751	4303.46	4026.56	2411.39	1085.72	645.861	562.851	616.228	461.892	conserved hypothetical protein
AAEL002374-RA	230.365	353.074	266.964	189.703	83.2894	74.5793	158.915	170.997	155.494	149.627	taxilin
AAEL002377-RA	1155.2	1817.43	1550.39	859.527	414.933	344.916	420.611	652.326	873.021	1045.25	small nuclear ribonucleoprotein-associated protein
AAEL002386-RA	3540.98	3824.63	4376.98	6194.83	5530.66	4342.5	3987.97	3072.76	3460.67	2766.51	conserved hypothetical protein
AAEL002387-RA	2185.65	5799.02	12333.1	9120.83	5677.58	4260.21	3053.71	2200.43	2062.17	1754.25	conserved hypothetical protein
AAEL002401-RA	12395.4	9965.52	13891.2	19912.7	11075	9980.95	8295.78	7668.11	5836.38	8704.99	proteasome subunit beta type
AAEL002433-RA	513.074	673.979	864.026	778.001	306.569	154.866	488.943	432.08	553.326	579.183	conserved hypothetical protein
AAEL002469-RB	206.242	281.726	286.77	309.493	129.848	83.3634	62.7593	216.441	152.791	192.202	endophilin a,	AAEL002469-RA endophilin a,
AAEL002483-RA	2206.45	6091.7	11648.3	10212	3313.31	1375.97	835.793	1706.31	1533.19	1678.15	conserved hypothetical protein
AAEL002488-RA	2021.05	3098.56	4740.87	4254.73	2166.66	1462.35	2217.97	1911.92	1870.09	1478.7	dead box atp-dependent rna helicase
AAEL002489-RA	833.648	1263.31	958.804	667.764	346.995	365.099	440.732	379.876	332.791	570.816	conserved hypothetical protein
AAEL002504-RA	2254.63	4135.11	4363.05	6894.23	3699.28	1695.49	1626.74	1507.6	3015.15	1670.39	atp synthase delta chain, mitochondrial
AAEL002526-RA	3253.03	4870.67	6222.87	10093.3	5852.45	3190.85	3644.38	2949.09	4396.18	2805.89	conserved hypothetical protein
AAEL002529-RA	1848.61	2181.86	1986.85	1318.96	769.799	953.212	1544.83	1553.17	1123.96	1427.39	conserved hypothetical protein
AAEL002542-RA	17804.6	11523.6	26720.2	44806.7	40269.5	25488.6	19528	42304.9	20806	32535.9	triosephosphate isomerase
AAEL002592-RA	564.964	888.469	1021.89	1580.31	435.215	418.899	221.421	179.993	149.433	242.811	hypothetical protein
AAEL002691-RA	337.815	1121.47	1300.66	2146.57	1501.66	1100.34	732.962	339.118	421.484	195.641	conserved hypothetical protein
AAEL002691-RB	252.343	805.718	961.201	1211.45	701.656	326.446	185.672	237.875	223.217	160.239	conserved hypothetical protein
AAEL002701-RA	1675.16	8004.17	15734.6	11877.8	4898.72	2865.96	2486.56	2235.99	1104.18	1291.39	mannosyltransferase
AAEL002709-RA	1762.63	4473.5	1994.88	1607.34	539.396	190.712	278.478	1346.88	1407.55	614.189	spliceosomal protein sap
AAEL002731-RA	1653.63	10254.2	6566.34	1918.33	503.353	1065.83	5153.79	2143.34	2381.72	1316.24	serine protease inhibitor, serpin
AAEL002736-RA	843.11	1073.54	1528.5	1344.51	946.566	880.421	502.977	171.908	160.415	130.218	conserved hypothetical protein
AAEL002740-RA	174.256	55.6921	96.7837	327.708	129.025	87.0446	48.5471	141.521	116.905	166.508	HOMEOBOX_PROTEIN_OTX_ORF
AAEL002741-RA	49.8017	133.641	222.274	221.587	85.4698	46.6158	43.5912	50.8938	43.6223	46.75	neither inactivation nor afterpotential D, putative
AAEL002748-RA	3069.15	7618.54	13235.6	7997.66	2867.72	1044.85	1009.73	2306.77	2020	1491.84	aspartyl-tRNA synthetase
AAEL002757-RA	100.017	589.688	452.193	144.024	135.096	84.2222	548.351	126.929	241.901	99.4247	hypothetical protein
AAEL002758-RA	2398.45	2668.47	2841.39	4146.5	2534.75	1445.49	1200.58	1122.97	2524.31	1684.12	conserved hypothetical protein
AAEL002760-RA	926.401	1553.13	1144.97	729.267	528.352	462.806	655.67	620.734	685.745	647.102	conserved hypothetical protein
AAEL002764-RA	2202.56	3955.2	6691.58	5503.38	3258.86	3008.83	3269.88	1831.15	2764.96	1641.52	Dihydrolipoamide succinyltransferase component of 2-oxoglutarate dehydrogenase_ORF	DS|2087|VB|AAEL002764-b|Dihydrolipoamide succinyltransferase component of 2-oxoglutarate dehydrogenase|ORF;;
AAEL002764-RB	4258.92	7045.62	10876.8	10524.5	5405.04	3654.06	4792.14	6074.58	6405.05	4763.72	dihydrolipoamide succinyltransferase component of 2-oxoglutarate dehydrogenase	AAEL002764-RA dihydrolipoamide succinyltransferase component of 2-oxoglutarate dehydrogenase
AAEL002766-RA	590.538	1128.15	1393.52	836.4	396.863	450.909	632.722	568.443	459.862	658.138	glutamyl-tRNA(Gln) amidotransferase subunit A
AAEL002772-RA	292.432	410.727	448.858	590.081	244.347	196.345	366.652	211.645	219.261	211.602	chromo domain protein
AAEL002774-RB	396.691	384.458	722.946	820.571	469.72	314.59	536.493	290.993	287.618	255.306	slender lobes, putative
AAEL002783-RA	851.443	1255.93	1272.62	912.601	393.093	366.023	621.912	605.346	536.794	364.438	Mitochondrial ribosomal protein, L37, putative_E2
AAEL002804-RA	819.385	2728.19	5604.37	10123.1	4896.38	1682.87	405.731	567.161	699.921	353.591	oligosaccharyl transferase
AAEL002805-RA	1643.26	3004.46	6339.97	6647.3	4420.28	3672.64	2316.97	1412.05	1013.61	1096.46	conserved hypothetical protein
AAEL002808-RA	2712.15	3934.44	3813.45	1739.16	1210.71	2075.59	2302.42	2013.72	1831.86	1376.34	diphthine synthase
AAEL002836-RA	4253.93	6052.46	7660.41	7253.3	7480.67	5320.46	3693.09	4329.8	4349.91	3150.66	carbon catabolite repressor protein
AAEL002838-RA	268.255	330.538	346.1	391.278	133.854	60.5921	106.166	195.219	152.54	270.313	conserved hypothetical protein
AAEL002861-RB	6665.63	13177.8	17590.4	12371.5	4543.81	3255.25	6673.62	10463.7	9225.58	8324.35	conserved hypothetical protein	AAEL002861-RA conserved hypothetical protein
AAEL002867-RA	18342.6	27607	35033.2	30720.8	13156	7177.21	4126.37	6684	7514.79	5760	phenylalanyl-tRNA synthetase alpha chain
AAEL002870-RB	6366.44	4752.77	8823	9866.08	4171.8	3535.4	4483.69	3686.62	3699.21	5442.01	dipeptidyl peptidase iii	AAEL002870-RA dipeptidyl peptidase iii
AAEL002873-RA	57.0894	83.826	72.3227	369.344	253.981	98.7165	81.744	57.9093	68.197	50.0305	conserved hypothetical protein
AAEL002876-RA	91.0666	182.327	158.94	421.764	310.665	359.645	225.499	74.3274	80.745	86.2354	conserved hypothetical protein
AAEL002898-RA	7387.46	22022.7	40119	57185	24659.6	7544.77	5868.1	9670.23	8404.19	13632.1	conserved hypothetical protein
AAEL002913-RA	3478.94	5872.76	6643.46	7558.56	5593.69	5111.35	4588.83	4661.94	4082.33	2424.86	peroxisomal membrane protein 70 abcd3
AAEL002988-RA	3246.59	13765	8807.62	6991.57	6480.41	7629.66	3719.35	5493.37	3106.3	5970.9	conserved hypothetical protein
AAEL002993-RA	984.655	2391.16	2323.61	1772.22	762.199	477.578	1063.33	1435.62	892.294	997.883	39S ribosomal protein L43
AAEL002996-RA	95.3459	463.601	1920.84	4925.01	1887.23	204.073	69.0977	127.506	108.779	91.6841	dolichyl glycosyltransferase
AAEL003005-RA	707.169	656.412	607.492	813.129	554.93	502.511	257.756	654.245	471.871	420.214	hypothetical protein
AAEL003016-RA	276.726	849.435	465.765	411.409	524.059	174.728	557.928	202.913	230.357	187.2	hypothetical protein
AAEL003034-RA	1685.7	2251.11	2446.19	1613.46	909.3	834.483	1066.49	1206.11	1043.87	1540.12	conserved hypothetical protein
AAEL003125-RA	5452.57	31189.7	37252.3	26594.4	9063.04	4107.49	2041.85	4587.53	6283.19	3415.84	acyl-coa dehydrogenase
AAEL003193-RA	13871.9	16106	17948.8	12841.5	6349.25	4149.73	6580.16	13121	10756.9	10284	inorganic pyrophosphatase	AAEL003193-RB inorganic pyrophosphatase
AAEL003210-RE	14327.1	8835.71	14989.7	24260.5	12454.7	10250.4	8018.83	9028.38	9504.69	12912.1	tetraspanin 29fa	AAEL003210-RC tetraspanin 29fa; AAEL003210-RD tetraspanin 29fa; AAEL003210-RA tetraspanin 29fa; AAEL003210-RB tetraspanin 29fa
AAEL003230-RA	1149.77	1313.21	2119.02	2359.98	1028.23	703.542	1232	895.589	972.916	1087.23	conserved hypothetical protein
AAEL003255-RA	593.791	5165.04	3646.26	2313.47	1504.02	1244.25	1124.12	294.648	263.179	178.622	hypothetical protein
AAEL003264-RA	970.088	887.497	1137.87	1424.28	898.641	637.581	863.194	539.909	700.569	892.453	conserved hypothetical protein
AAEL003271-RA	411.771	274.29	434.706	396.075	150.653	70.9474	170.957	193.675	151.174	221.644	conserved hypothetical protein
AAEL003273-RA	450.96	765.159	915.901	712.58	337.649	302.464	526.074	350.965	335.751	311.856	cell division cycle
AAEL003277-RA	143.222	234.92	235.876	369.864	352.46	232.278	166.189	114.65	115.166	103.091	hypothetical protein
AAEL003285-RA	3819.62	14001.1	31164.3	32254.2	25548.1	13186.4	2142.95	1779.42	2699.59	1165.51	translocation associated membrane protein
AAEL003287-RB	683.011	1129.9	847.76	626.633	291.258	206.724	228.363	640.595	606.287	619.195	arsenite-resistance protein
AAEL003302-RA	594.339	939.136	1147.33	1359.96	734.421	575.021	711.988	404.516	318.966	440.232	conserved hypothetical protein
AAEL003331-RA	103.831	302.588	262.562	372.849	167.13	137.967	125.061	81.668	92.2837	52.5631	leucine-rich transmembrane protein
AAEL003365-RA	45.5594	84.2166	82.6115	167.751	73.1816	46.1437	37.2464	46.8644	51.9933	41.1303	fumarylacetoacetate hydrolase
AAEL003365-RB	1599.64	3292.52	5224.82	10732.4	8261.28	3508.49	1179.74	1298.16	1882.15	876.838	fumarylacetoacetate hydrolase
AAEL003377-RA	2133.66	7941.34	11402.3	9451.91	4113.43	2083.3	1220.34	1612.79	1564.32	1247.43	signal recognition particle
AAEL003393-RA	49687.7	62200.6	59508.4	56001.7	18991.7	9730.71	14426.2	31923.8	38766.5	23366.2	atp synthase beta subunit
AAEL003397-RA	581.473	799.946	752.3	305.469	128.756	160.872	439.301	393.974	465.751	397.714	mitochondrial ribosomal protein L17	DS|1039|AAEL003397|Mitochondrial ribosomal protein L17|E1; DS|1039|AAEL003397|Mitochondrial ribosomal protein L17|E1;;
AAEL003408-RA	44.4567	133.775	241.253	150.684	58.7818	51.2336	78.7719	45.3678	41.0808	38.7712	leucine-rich transmembrane protein
AAEL003418-RA	17611.1	38002.8	82935.5	117730	61892.8	23758.9	10116.5	16862.4	11603.9	13904	microsomal signal peptidase 25 kda subunit
AAEL003443-RA	3039.24	5986.5	4414.1	1609.68	1065.28	707.541	255.557	183.959	255.89	393.578	threonine dehydrogenase
AAEL003455-RA	101.496	337.145	261.943	137.161	59.9143	67.1917	60.8616	231.637	121.646	159.862	conserved hypothetical protein
AAEL003468-RA	402.332	1548.43	1602.19	1254.62	1462.35	614.474	147.433	341.567	416.466	264.564	dolichyl-diphosphooligosaccharide protein glycosyltransferase
AAEL003477-RA	1041.23	1245.85	950.758	891.754	443.351	308.804	492.754	680.171	842.106	814.222	peptidyl-prolyl cis-trans isomerase h, ppih
AAEL003489-RA	519.167	1108.27	1216.34	768.399	500.862	251.724	423.637	475.078	437.19	352.095	conserved hypothetical protein
AAEL003536-RA	1569.73	4298.24	9968.3	9863.31	4774.89	1821.67	920.16	1377.83	1074.1	1256.88	conserved hypothetical protein
AAEL003547-RA	103.581	272.788	101.019	49.3094	45.3077	36.7783	51.2538	58.7144	45.0304	45.5134	hypothetical protein
AAEL003571-RA	2605.93	5182.73	5132.86	5109.83	3083.32	2149.39	1147.81	2009.68	1619.32	1901.84	factor for adipocyte differentiation
AAEL003581-RA	27865.3	75260.6	61796.5	33912.5	22012.6	23773.3	3779.8	11305.7	23975.4	20405.7	amidophosphoribosyltransferase	AAEL003581-RB amidophosphoribosyltransferase
AAEL003606-RA	22910.1	133062	156331	112863	52923.5	28625.4	10267.7	36234.5	71944.9	47069.9	purine biosynthesis protein 6, pur6
AAEL003619-RB	39.6116	45.6536	40.3423	76.822	41.445	50.2206	34.1231	40.2897	43.2564	48.951	sodium/shloride dependent amino acid transporter
AAEL003634-RA	5899.93	7961.65	9195.83	5651.16	2947.5	2618.6	3267.37	3697.3	3668.66	2831.67	Hsp70-interacting protein, putative
AAEL003646-RA	1364.4	4921.18	2814.02	2760.01	1224.78	835.479	666.245	1063.95	1287.28	1261.44	conserved hypothetical protein
AAEL003652-RA	286.199	441.579	561.763	978.094	594.776	455.626	429.038	177.107	349.81	174.002	proprotein_convertase_subtilisin/kexin_type_4,furin1_ORF	SGR|0070|VB|AAEL003652|VITELLOGENIN_CONVERTASE|ORF; SGR|0048|VB|AAEL003652|proprotein_convertase_subtilisin/kexin_type_4,furin1|ORF; SGR|0070|VB|AAEL003652|VITELLOGENIN_CONVERTASE|ORF; SGR|0048|VB|AAEL003652|proprotein_convertase_subtilisin/kexin_type_4,furin1|ORF; SGR|0070|VB|AAEL003652|VITELLOGENIN_CONVERTASE|ORF; SGR|0048|VB|AAEL003652|proprotein_convertase_subtilisin/kexin_type_4,furin1|ORF; …
AAEL003662-RA	240.663	306.099	157.816	103.97	88.3192	91.0054	213.46	150.438	181.232	176.444	puckered protein, putative
AAEL003670-RA	2280.74	2945.99	3669.77	2556.84	1474.41	1254.44	1154.51	2474.12	2233.45	1990.15	myelinprotein expression factor
AAEL003703-RA	68.112	113.5	205.135	216.662	105.896	53.7908	58.2144	58.9196	77.7153	51.0841	scarlet protein
AAEL003704-RA	791.613	1574.02	1733.42	1017.05	315.002	223.118	724.349	603.089	609.992	629.214	39S ribosomal protein L13, mitochondrial_E2
AAEL003718-RA	178.872	171.846	190.173	363.603	281.661	133.028	93.0612	125.289	110.836	106.042	sugar_transporter_E1-5
AAEL003744-RA	127.326	154.969	145.253	116.153	52.0472	42.3926	66.4881	105.316	83.8273	79.8858	conserved hypothetical protein
AAEL003749-RA	1372.58	1423.02	1853.41	2426.9	1526.05	1003.44	984.94	1197.55	1054.39	1813.17	conserved hypothetical protein
AAEL003755-RA	379.725	608.596	703.281	1133.45	591.601	397.253	551.568	253.364	246.557	303.136	BolA protein, putative
AAEL003762-RA	655.909	727.724	1100.87	1097.65	423.822	347.157	609.431	642.416	457.961	622.973	Protoporphyrinogen IX oxidase, putative
AAEL003785-RA	2878.23	4316.81	4786.9	5627.18	3367.44	2647.16	1849.34	2247.02	2019.76	1638.02	conserved hypothetical protein
AAEL003791-RA	1441.25	4233.51	12933.5	13552	5632.25	2417.41	1783.96	1267.91	892.014	906.523	conserved hypothetical protein
AAEL003801-RA	4016.41	6946.74	6772.02	2950.51	1350.13	942.494	1946.68	3314.18	2288.03	2350.33	28S ribosomal protein S5	DS|0910|AAEL003801|28S ribosomal protein S5|E2; DS|0910|AAEL003801|28S ribosomal protein S5|E2;;
AAEL003822-RB	422.966	715.368	490.652	302.564	126.739	156.781	363.605	432.811	263.482	332.518	conserved hypothetical protein
AAEL003834-RA	62.0005	80.0854	92.0029	118.354	105.456	57.3341	65.1159	55.0393	59.5664	49.9082	METALLOPROTEINASE_ORF
AAEL003858-RA	515.08	686.159	692.488	593.443	316.565	257.349	299.836	345.687	338.158	443.038	conserved hypothetical protein
AAEL003859-RA	81.4595	175.174	417.814	427	203.396	172.353	131.314	75.4539	74.5563	64.2867	leucine-rich transmembrane protein
AAEL003870-RA	645.274	942.421	691.242	580.632	469.566	265.854	454.056	434.141	390.367	558.076	conserved hypothetical protein
AAEL003871-RA	7492.67	5514.22	6856.68	8977.05	4484.12	4053.7	4315.31	4519.31	3070.62	4373.87	proteasome subunit alpha type
AAEL003874-RA	622.922	618.308	1589.66	1674.6	676.921	267.718	294.272	674.126	375.052	793.497	conserved hypothetical protein
AAEL003879-RA	2113.51	3998.44	2595.17	1115.23	699.599	733.588	1761.02	1255.5	1539.32	1386.8	conserved hypothetical protein
AAEL003911-RA	2093.9	2923.08	3351.94	3870.77	2685.29	2112.75	1223.73	1906.71	1711.93	1934.85	conserved hypothetical protein
AAEL003913-RA	275.987	641.96	483.654	390.895	141.208	190.062	306.435	205.822	259.679	253.108	methionine-tRNA synthetase
AAEL003922-RA	2044.55	2574.74	2190.1	1375.03	562.551	576.181	892.755	934.939	1458.98	1292.94	conserved hypothetical protein
AAEL003926-RA	1586.4	2141.73	2009.49	1427.56	496.061	407.341	1102.14	889.29	817.18	1091.54	gtp-binding protein lepa
AAEL003939-RA	1038.49	1772.82	2959.22	3445.16	2196.28	1438.49	1100.61	995.102	982.287	611.148	eukaryotic translation initiation factor 2-alpha kinase 3 (pancreatic eif2-alpha kinase)
AAEL003946-RA	657.492	1267.65	1236.65	887.354	298.594	264.417	725.225	527.825	553.431	558.242	Mitochondrial ribosomal protein S33, putative_E1
AAEL003980-RA	1166.83	1843.35	3055.88	3627.69	1943.83	1190.19	1251.61	979.237	1026.16	839.646	component of oligomeric golgi complex
AAEL003993-RA	8648.36	19781.9	26133.7	33551.2	15610.8	4498.72	6267.04	9965.86	11714.7	9010.13	cyclohex-1-ene-1-carboxyl-CoA hydratase, putative
AAEL004008-RA	58.4416	142.38	125.918	248.356	85.7468	61.7494	49.1172	58.2225	54.5559	58.6444	acetylcholine receptor protein alpha 1, 2, 3, 4 invertebrate
AAEL004019-RA	97.2291	354.058	358.413	611.413	424.358	195.509	166.948	86.5124	101.72	87.1173	hypothetical protein
AAEL004023-RA	198.755	1794.91	6891.66	8229.4	4275.54	1905.15	516.685	532.586	513.541	354.031	Juvenile hormone-inducible protein, putative
AAEL004034-RA	84.2513	149.339	121.373	65.2115	41.3738	45.5415	54.3894	63.4376	89.2342	58.7588	Mitochondrial ribosomal protein, S6, putative_E1
AAEL004042-RB	2058.03	2764.22	6023.89	7493.79	3586.06	1512.25	2921.55	1627.51	1386.83	1329.83	conserved hypothetical protein	AAEL004042-RC conserved hypothetical protein; AAEL004042-RA conserved hypothetical protein;;
AAEL004050-RA	436.58	1278.28	2616.45	3162.69	1538.23	398.129	373.385	236.674	274.425	277.095	diphosphomevalonate decarboxylase
AAEL004069-RA	162.815	319.033	391.836	456.721	86.1194	62.6528	239.783	143.674	168.787	109.896	Mitochondrial 28S ribosomal protein S14 (s14mt)_E1
AAEL004076-RA	1520.05	4685.34	11287.9	10289.2	4334.5	1495.73	1083.74	1068.44	866.976	892.403	ubiquitin-activating enzyme E1
AAEL004087-RA	180.24	376.725	580.854	839.644	682.741	422.228	341.333	171.898	205.848	116.074	conserved hypothetical protein
AAEL004116-RA	290.83	886.432	820.535	876.29	232.48	93.1889	578.795	292.734	298.947	387.187	hypothetical protein
AAEL004127-RA	873.735	1762.24	2432.13	4637.28	2097.53	1210.31	966.853	809.925	1420.2	552.823	acyl-coa dehydrogenase
AAEL004135-RA	283.278	343.795	433.498	785.571	449.685	285.448	415.314	276.587	357.614	193.444	sterol desaturase
AAEL004183-RA	1074.34	2140.23	1890.57	1000.75	854.047	676.986	721.693	742.669	682.017	685.003	conserved hypothetical protein
AAEL004228-RA	2099.1	3828.35	8445.03	12178.2	6203.99	1874.33	739.508	1820.62	1670.45	1831.7	oligosaccharyl transferase
AAEL004247-RA	1259.76	2471.64	5713.86	3767.72	2866.95	3276.29	1559.9	1511.71	2186.54	2070.9	sodium_channel_E5-6
AAEL004275-RA	38.4663	40.7491	42.4339	84.55	40.7604	45.4618	37.6095	46.9172	42.104	38.4048	Osiris, putative
AAEL004291-RA	1846.6	1702.13	2131.77	2577.03	2033.72	1299.77	893.305	1115.33	863.001	1266.68	translin	AAEL008508-RA translin
AAEL004300-RA	229.909	435.203	895.867	970.575	572.942	319.79	405.473	306.893	257.665	192.492	conserved hypothetical protein
AAEL004304-RA	119.003	289.234	352.744	294.489	223.738	197.041	232.002	127.281	91.4861	94.6959	hypothetical protein
AAEL004313-RA	7970.88	9363.56	15704.5	26341.4	22022.5	8546.93	475.855	587.188	486.093	654.48	fk506-binding protein
AAEL004327-RA	4418.72	8698.65	12680.2	9248.61	4520.38	2038.64	1066.74	2372.15	3270.81	1836.14	valyl-trna synthetase
AAEL004333-RA	395.929	735.453	504.571	396.309	176.485	243.191	255.78	322.107	291.122	301.648	pax neighbour protein
AAEL004343-RA	44.5766	155.16	586.242	1537.68	270.654	157.943	45.0122	47.424	49.3714	40.7031	conserved hypothetical protein
AAEL004345-RA	6431.07	11559.3	18121.8	8440.7	3723.72	2453.13	2368.2	4378.77	4857.23	4893.17	cysteinyl-tRNA synthetase
AAEL004347-RA	4338.12	5607.5	5515.72	5193.29	3482.56	2781.79	1809.76	2139.07	3941.59	2400.55	dendritic cell protein
AAEL004350-RA	7442.19	6173	6854.84	8119.13	3706.59	2765.63	3300.8	3360.83	3054.74	4759.29	janus A, putative
AAEL004355-RA	534.122	668.022	597.101	425.027	174.37	158.449	456.141	441.051	338.378	404.834	conserved hypothetical protein
AAEL004376-RA	943.1	1715.2	1163.3	777.656	471.344	462.681	596.206	573.764	633.552	673.944	conserved hypothetical protein
AAEL004384-RA	302.515	575.009	1144.41	1999.49	1581.47	939.495	401.712	206.504	297.59	307.069	hypothetical protein
AAEL004423-RA	46805	47047.8	44251	51413.8	32287.7	17635.7	17640.4	31899.9	37740.2	33228.6	mitochondrial F0 ATP synthase D chain, putative	AAEL004423-RB mitochondrial F0 ATP synthase D chain, putative
AAEL004425-RA	3668.55	6711.98	12554	12574.7	7052.3	3536.5	3514.39	4186.04	2293.76	2831.28	ctg4a
AAEL004426-RA	1622.92	2815.91	6577.64	6903.93	4308.92	2992.46	3297.84	1847.49	2651.39	1690.27	Syntaxin 18, putative
AAEL004429-RA	434.419	615.471	597.647	570.317	215.201	229.863	491.024	351.474	283.915	451.862	conserved hypothetical protein
AAEL004430-RA	1353.44	2680.92	3442.41	2100.84	1157.45	1094.66	2078.73	1430.9	1525.06	1286.75	Mitochondrial ribosomal protein, L30, putative_E3
AAEL004433-RA	1394.35	2555.68	2588.28	1624.89	590.536	615.619	1183.94	902.481	1024.12	995.327	Mitochondrial ribosomal protein, L14, putative_E2
AAEL004448-RA	2440.9	2846.82	4133.84	7648.23	4653.01	2509.38	2782.83	2445.47	2125.01	2569.58	torsin a
AAEL004449-RA	1065.86	2217.9	3778.12	4141.97	2002.62	1201.39	1271.73	1142.07	1039.82	1230.41	conserved hypothetical protein
AAEL004452-RA	96.2097	575.016	738.212	651.997	196.477	69.0835	94.7463	131.828	96.0537	107.678	fast myosin heavy chain HCIII, putative
AAEL004454-RA	4344.86	4817.51	4432.17	6100.7	4301.51	3805.45	2530.92	1596.39	2959.02	2603.02	hypothetical protein
AAEL004456-RA	718.606	896.426	683.25	419.167	342.066	390.507	594.268	523.921	681.797	493.182	dead box atp-dependent rna helicase
AAEL004457-RA	7794.02	11791.8	13408.8	6104.86	2855.13	2681.3	3263.33	6198.51	4955.81	5649.95	cytochrome c	AAEL004457-RB cytochrome c; AAEL004457-RC cytochrome c;;
AAEL004461-RA	96.2953	468.762	462.873	490.06	141.956	113.002	122.792	129.278	112.113	96.2738	lamin, putative
AAEL004490-RA	4134.87	6365.34	9658.77	6977.2	2513.4	1603.35	1891.03	3215.06	1989.63	3660.49	conserved hypothetical protein
AAEL004497-RA	680.845	1284.76	2247.85	3557.06	2527.69	1490.7	1180.66	763.601	755.235	633.053	conserved hypothetical protein
AAEL004511-RA	1215.72	2176.75	1785.86	904.279	385.813	337.468	749.214	818.655	717.061	846.124	conserved hypothetical protein
AAEL004514-RA	254.993	613.531	1308.51	2038.68	1245.31	902.331	786.386	262.84	301.226	159.887	conserved hypothetical protein
AAEL004523-RA	15130.3	73775	111619	90082.7	40170.6	12575.4	2578.87	9084.69	6779.36	5243.47	preprotein translocase secy subunit (sec61)
AAEL004527-RA	6521.19	6604.73	9005.44	5280.12	1958.05	2120.53	4719.37	4786.66	3103.35	5224.12	Mitochondrial ribosomal protein S7_E2
AAEL004531-RA	97.0575	251.686	313.06	515.923	288.956	151.183	285.294	82.4813	100.198	93.2088	hypothetical protein
AAEL004538-RA	369.788	688.455	1115.7	1186.99	693.446	361.09	358.311	366.368	321.426	313.125	n-acetylgalactosaminyltransferase
AAEL004546-RA	1463.7	3836.27	7207.02	6557.11	3229.99	1427.16	1047.56	1244.54	1537.31	905.626	coatomer beta subunit
AAEL004565-RA	10662.9	11370.1	22385.6	25877.2	19371.8	13249.2	9223.9	9505.7	6296.16	7766.69	adp-ribosylation factor, arf
AAEL004566-RA	895.048	1020.7	1632.92	2052.69	1113.95	675.7	833.693	694.66	802.661	769.986	myo inositol monophosphatase
AAEL004594-RA	8328.49	9977.85	18344.7	11855	7447.67	5928.89	5593.57	4681.23	5075.97	6303.51	galactose_transpt_E3
AAEL004603-RA	2595.88	9998.09	23731.5	41658.2	20790.6	6560.91	1800.93	2498.61	2370.92	1994.13	signal peptidase 12kDa subunit, putative
AAEL004613-RA	15678.7	16860.6	18087.6	22680.9	11148	4761.97	2264.75	5877.99	10272.2	5640.58	phenylalanyl-tRNA synthetase beta chain
AAEL004628-RA	253.683	141.365	178.367	410.381	279.92	233.89	177.392	289.421	199.565	313.258	hypothetical protein
AAEL004643-RA	956.856	1319.49	1386.29	663.903	435.576	462.919	904.886	683.425	544.966	405.228	Mitochondrial ribosomal protein L1_E1
AAEL004685-RA	789.994	1525.26	1771.98	1551.93	728.019	620.265	1124.81	695.219	745.065	541.082	succinate semialdehyde dehydrogenase
AAEL004695-RA	618.52	1499.11	2029.51	2754.29	3472.8	1032.89	389.412	292.481	425.742	250.543	hypothetical protein
AAEL004697-RA	809.43	1780.95	3158.87	3595.5	2971.82	1717.17	830.492	1107.19	909.449	936.403	synoviolin
AAEL004706-RA	104.589	327.642	220.1	82.4218	42.8779	44.4281	48.974	81.6573	68.7217	82.5911	conserved hypothetical protein
AAEL004708-RA	1399	3111.8	2604.42	1455.33	811.069	699.115	909.625	1144.89	997.671	1208.92	2-phosphodiesterase
AAEL004726-RA	2072.13	2685.7	2347.28	1596.67	916.616	1023.06	1621.81	1384.14	1718.53	1423.84	conserved hypothetical protein
AAEL004733-RA	3725.67	5070.14	6895.1	7388.18	4622.2	4388.82	4102.27	3182.72	2849.39	3729.43	jun activation domain binding protein
AAEL004740-RA	482.69	866.38	797.901	359.885	86.0706	92.8391	263.732	279.532	224.155	326.379	35 kDa GTP-binding protein, putative
AAEL004743-RB	178.463	190.806	183.034	226.087	83.5459	62.5985	117.942	189.398	154.586	157.804	multidrug resistance protein 2 (atp-binding cassette protein c)
AAEL004749-RA	103.204	172.092	185.342	453.65	264.194	181.557	106.203	68.6673	83.9914	66.9293	pupal cuticle protein, putative
AAEL004756-RA	422.776	2717.11	2458.57	2915.35	1529.65	907.415	595.023	389.822	501.793	396.557	vesicle docking protein P115
AAEL004779-RA	770.926	1009.5	987.809	791.257	458.069	405.044	614.277	457.666	458.413	616.097	cyclophilin-10
AAEL004855-RA	188115	232349	214527	215110	164103	124419	102481	160892	207827	186089	adp,atp carrier protein
AAEL004877-RA	425.258	674.324	543.641	426.441	86.0559	56.9691	133.229	244.224	211.555	235.769	conserved hypothetical protein
AAEL004879-RA	3406.82	8241.26	26371.3	27588.5	11322	5409.53	2953.21	3725.07	4015.56	4345.37	conserved hypothetical protein
AAEL004896-RA	5186.03	6977.4	4202.2	2337.44	1418.65	1380.41	2314.19	2245.52	2241.98	2192.94	conserved hypothetical protein
AAEL004900-RA	661.682	887.407	1519.95	1784.63	1337.31	896.292	935.805	761.759	839.579	635.902	geranylgeranyl pyrophosphate synthase
AAEL004914-RA	5639.06	11147.1	23848.6	23254.9	11758	5568.39	3374.01	5455.56	4545.57	5130.81	conserved hypothetical protein
AAEL004931-RB	7685.33	11139.8	8157.04	8641.65	5244.59	3687.13	2927.45	2997.44	7718.37	2348.06	beta-hexosaminidase b	AAEL004931-RA beta-hexosaminidase b
AAEL004938-RA	248.447	600.735	851.448	1288.05	974.542	637.334	404.127	274.71	503.005	240.677	hypothetical protein
AAEL004941-RB	1020.86	1234.49	1712.06	3635.9	2706.13	1543.6	454.417	705.759	848.452	467.536	cytochrome P450	AAEL004941-RA cytochrome P450
AAEL004942-RB	92.2455	293.063	180.761	161.686	55.3226	72.7061	153.83	107.034	78.7445	84.1907	helicase
AAEL004969-RA	8084.59	29017.4	30393.2	33896.6	24613.9	15388.6	5254.88	8189.2	13583	5839.63	conserved hypothetical protein
AAEL004971-RA	922.405	1072.52	1581.52	2418.5	2028.6	1603.85	1263.2	973.504	992.428	832.37	membralin
AAEL004973-RA	2200.08	3180.99	6778.79	5659.36	4315.88	2800.6	2165.47	2562.87	2017.27	2578.36	golgi phosphoprotein 3 (coat-protein GPP34)
AAEL004977-RA	1068.74	4607.52	5911.11	5393.06	3654.11	1923.43	1076.95	1608.39	1483.13	871.344	Sec24B protein, putative
AAEL004984-RA	2533.6	2772.63	3612.49	3062.54	1775.7	1111.6	1230.72	1847.58	1309.99	1294.08	cullin-associated NEDD8-dissociated protein 1
AAEL004993-RA	513.041	2351.88	2861.38	3131.2	2165.64	1178.58	585.485	648.918	643.793	429.57	hypothetical protein
AAEL005015-RA	97.8493	280.333	308.415	746.149	416.076	265.081	103.251	85.4944	153.001	103.28	hypothetical protein
AAEL005037-RA	7133.81	14720.8	19509.4	16610	8508.77	3170.74	1823.37	4586.36	5510.13	2195.71	seryl-tRNA synthetase
AAEL005041-RA	296.091	548.599	465.915	148.496	102.935	51.8274	236.77	180.452	140.688	155.443	wd-repeat protein_E1
AAEL005050-RA	680.48	837.141	768.946	514.512	267.056	373.287	489.442	430.725	316.481	513.689	conserved hypothetical protein
AAEL005059-RA	959.019	1354.38	2194.3	4886.21	2795.81	1902.3	2309.7	1083.63	1299.15	1054.35	ptpla domain protein	AAEL005229-RA ptpla domain protein
AAEL005065-RA	612.319	2121.41	4313.07	6786.14	3497.98	1225.98	1052.22	645.058	870.211	470.047	ptpla domain protein
AAEL005075-RA	969.637	1867.14	1752.23	1601.14	970.43	810.729	1170.92	778.135	1448.53	655.356	ecsit (evolutionarily conserved signaling intermediate in toll pathways)
AAEL005078-RA	274.408	369.856	375.593	352.802	134.712	139.98	291.648	187.039	168.583	188.158	zinc finger protein
AAEL005092-RA	1263.67	2617.23	2502.56	1706.44	691.324	626.796	980.45	1135.65	1062.11	1074.75	n-myristoyl transferase
AAEL005119-RA	47.2825	66.7396	149.858	270.049	258.238	227.233	57.2828	57.3644	68.2243	50.7237	conserved hypothetical protein
AAEL005127-RA	464.837	795.818	936.241	1904.43	1003.93	551.105	846.32	623.949	1081.76	596.098	ribonuclease UK114, putative
AAEL005141-RA	2888.73	4427.51	5741.15	7733.65	4490.07	3358.98	2492.1	2087.05	2045.82	2548.29	conserved hypothetical protein
AAEL005142-RA	792.69	680.553	859.656	2015.62	1397.46	1250.88	1003.97	663.301	731.95	462.581	platelet endothelial tetraspan antigen 3 (cd151 antigen)
AAEL005143-RA	2479.93	4383.95	4797.93	7631.3	6494.27	2993.59	2248.01	2146.77	3320.78	2158.5	ubiquinone binding protein, putative
AAEL005143-RB	3423.6	5919.88	6305.97	10153.9	8018.7	3609.79	2803.78	2806.3	4392.38	2954.68	ubiquinone binding protein, putative
AAEL005146-RA	1243.46	1759.88	2309.76	1421.3	701.712	800.147	1257.55	1008.7	660.205	815.714	conserved hypothetical protein
AAEL005150-RA	4793.93	6199.89	6926.09	4525.9	2827.94	2307.97	3715.79	3838.52	3804.95	4354.76	Mitochondrial ribosomal protein, L23, putative_E2
AAEL005171-RA	537.01	980.516	1106.23	755.072	363.089	164.2	590.79	326.477	399.451	359.209	conserved hypothetical protein
AAEL005180-RA	411.589	1085.76	1621.36	1496.76	726.958	337.246	271.136	499.551	510.692	730.662	conserved hypothetical protein
AAEL005185-RA	278.625	1076.03	1661.3	668.872	77.8217	75.518	136.996	254.738	285.386	377.33	conserved hypothetical protein
AAEL005190-RA	6408.91	13754.8	10276.5	8984.07	4073.5	5131.46	3306.03	4448.68	4865.17	4111.77	mitochondrial ribosomal protein, L42, putative	DS|1016|AAEL005190|Mitochondrial ribosomal protein, L42, putative|E1; DS|1016|AAEL005190|Mitochondrial ribosomal protein, L42, putative|E1;;
AAEL005200-RA	364.195	3401.37	6905.62	9552.94	8206.19	5242.44	340.997	227.238	111.478	91.0166	juvenile hormone esterase
AAEL005201-RA	151.517	861.288	953.931	604.671	223.221	95.391	104.741	117.623	101.23	67.0461	hydroxymethylglutaryl-coa synthase
AAEL005210-RA	40.0569	85.0124	117.68	134.127	73.7288	76.563	40.623	37.5897	37.2514	38.2064	juvenile hormone esterase
AAEL005217-RA	1103.64	4172.76	10300.9	7350.86	2924.79	1404.29	1350.09	1075.55	1130.36	1158.62	membrin
AAEL005220-RA	118.754	290.26	221.998	323.482	60.8403	49.5655	41.1761	65.1087	74.6478	60.446	60S ribosomal protein L30_E1
AAEL005223-RA	731.224	2256.92	5091.98	7651.05	4206.93	1481.61	1263.15	768.422	954.362	561.356	ptpla domain protein
AAEL005263-RA	2562.21	3325.93	2537.89	1574.84	996.23	984.877	1240.66	1457.13	1464.66	1955.23	U3 small nucleolar ribonucleoprotein protein IMP3 (U3 snoRNP protein IMP3), putative
AAEL005269-RC	42126.5	43212.5	46140.4	44063.4	23173.1	16100.5	18241.4	33982.4	43339.8	29744.5	ubiquinol-cytochrome c reductase complex core protein	AAEL005269-RA ubiquinol-cytochrome c reductase complex core protein; AAEL005269-RB ubiquinol-cytochrome c reductase complex core protein;;
AAEL005273-RA	933.378	2042.69	1522.05	849.236	328.5	366.828	598.711	540.993	432.836	812.383	conserved hypothetical protein
AAEL005279-RA	375.344	553.054	832.45	660.517	556	134.977	488.488	227.477	199.381	227.436	methionyl-tRNA formyltransferase
AAEL005292-RA	15034.1	19260.5	19423.6	20304.6	11041.4	5760.77	5987.9	10360.9	11235.9	12774	stretch regulated skeletal muscle protein, putative	AAEL013913-RA stretch regulated skeletal muscle protein, putative
AAEL005307-RA	32938.9	31359.8	31950.4	21873.4	8852.39	5071.05	4779.86	15410.4	19043.6	16054	aminoacyl-tRNA synthetase auxiliary protein, 43kD, putative
AAEL005308-RA	24520.2	17680.7	28825	17812.3	8960.15	7738.65	15027.9	16895.4	17728.2	15705.9	Pyruvate dehydrogenase F_ORF	DS|2099|VB|AAEL005308-b|Pyruvate dehydrogenase F|ORF; DS|2098|VB|AAEL005308-a|Pyruvate dehydrogenase F|ORF; DS|2099|VB|AAEL005308-b|Pyruvate dehydrogenase F|ORF
AAEL005308-RB	1679.63	2383.15	3477.86	3262.16	1647.46	1385.1	2171.44	1695.19	2386.61	828.353	pyruvate dehydrogenase	AAEL005308-RA pyruvate dehydrogenase
AAEL005336-RA	296.364	2099.95	3168.56	7166.98	3911.41	1869.12	399.5	266.438	738.413	384.198	d-3-phosphoglycerate dehydrogenase_E1
AAEL005341-RA	842.488	1453.5	2424.75	2510.16	1828.89	1483.14	1189.21	1201.39	1190.91	1176.15	hook protein
AAEL005349-RA	2728.54	3434.6	2138.95	1036.68	106.45	67.9901	305.403	484.653	298.494	394.195	conserved hypothetical protein
AAEL005384-RA	16279.6	127503	132426	78108	22409.4	11238.9	3926.16	17726.5	32532.6	25975	phosphoribosylformylglycinamidine synthase, putative
AAEL005408-RA	587.931	697.19	1147.38	1345.99	687.272	566.396	751.25	590.544	795.279	462.439	annexin x
AAEL005413-RA	256.952	323.461	224.011	311.801	127.606	60.3409	116.362	205.04	176.081	207.002	Mitochondrial ribosomal protein, S11, putative_E2
AAEL005413-RB	1019.98	1658.1	1911.09	1484.63	597.178	591.7	1442.65	1102.55	932.539	1036.14	mitochondrial ribosomal protein, S11, putative
AAEL005414-RA	4491.02	6101.13	7374.43	8811.44	5588.8	4467.53	4146.95	3004.66	3637	2639.46	conserved hypothetical protein
AAEL005417-RA	618.949	1265.43	2428.81	2935.6	1651.75	1004.57	1515.29	951.613	1376.99	697.195	annexin x
AAEL005421-RA	70.719	172.464	82.6902	61.8155	45.0253	48.512	73.8396	64.637	73.0653	61.8094	hypothetical protein
AAEL005429-RA	523.705	3110.69	8800.9	9834.98	4213.75	1743.5	584.959	829.606	1813.24	803.417	2-oxoglutarate dehydrogenase	DS|2088|VB|AAEL005429|2-oxoglutarate dehydrogenase A|ORF
AAEL005455-RA	2651.74	2924.93	1413.94	454.058	364.08	496.846	771.691	1504.03	2207.31	1128.84	ctp synthase
AAEL005457-RA	4776.95	14586.5	31110.3	43877.4	30755.4	10082.9	3253.87	3575.82	3890.68	3259.38	conserved hypothetical protein
AAEL005466-RA	958.931	1103.77	1270.97	2088.19	1245.42	883.405	846.298	531.491	679.912	856.526	conserved hypothetical protein
AAEL005468-RA	812.014	1839.28	1943.1	1964.74	1059.97	747.266	1132.09	1004.43	818.508	909.618	glycosyltransferase
AAEL005471-RA	11258.7	54233.3	102345	78970.6	31654.8	10940.8	3144.26	6404.57	5756.57	6588.04	Sec61 protein complex gamma subunit, putative
AAEL005500-RA	1171.6	1930.87	4196.32	4953.21	4284.54	2646.89	1530.28	898.663	993.683	945.526	conserved hypothetical protein
AAEL005515-RB	280.7	535.075	218.284	91.565	60.8781	115.123	169.315	125.096	167.772	112.931	heterogeneous nuclear ribonucleoprotein
AAEL005518-RA	1038.55	1389.96	439.311	271.904	171.334	327.178	694.218	833.401	861.099	345.272	hypothetical protein
AAEL005523-RA	4876.12	7881.21	15086.7	14929.6	12282.7	11069.4	8031.19	6527.64	6636.65	6681.21	Selenoprotein G, putative
AAEL005526-RA	33.9234	37.3149	39.1591	125.735	50.5836	58.6421	43.9283	36.7297	33.742	35.3485	conserved hypothetical protein
AAEL005541-RA	1805.98	2124.15	1605.31	1256.28	753.134	818.942	1233.21	904.443	858.39	943.192	peptidyl-prolyl cis-trans isomerase (cyclophilin)
AAEL005549-RA	244.824	277.181	289.834	351.981	55.6068	67.3862	111.933	176.819	152.532	173.554	hypothetical protein	AAEL003124-RA hypothetical protein
AAEL005558-RA	990.07	2053.66	2290.54	4167.15	3232.34	2907.81	1823.74	1041.97	1855.2	673.087	conserved hypothetical protein
AAEL005574-RA	218.866	368.406	533.243	659.735	131.144	80.9926	110.601	188.008	120.96	166.978	hypothetical protein
AAEL005579-RA	10079.5	10676.8	11328.8	5135.1	1886.83	1455.59	1867.19	4610.31	4425.54	4058.91	developmentally regulated gtp-binding protein 1 (drg 1)
AAEL005598-RA	247.052	449.152	457.463	352.606	83.6453	70.917	265.042	136.153	194.892	130.667	conserved hypothetical protein
AAEL005610-RA	55023.6	50121.7	50355.6	49702	34475	20497.9	22587.9	40240	46169.9	43392.5	mitochondrial atp synthase b chain
AAEL005636-RA	2212.61	3372.62	4151.18	3693.34	2169.52	1302.28	1595.45	1519.17	1628.75	828.187	eukariotic translation initiation factor 2b, epsilon subunit
AAEL005678-RA	81.7888	120.735	143.838	119.406	57.8981	59.1102	84.6101	74.0977	68.2092	68.8857	galactose_transpt_E2
AAEL005684-RA	901.31	2044.42	3782.51	4471.02	2387.31	1305.18	1350.74	882.29	1017.63	1251.82	chitinase
AAEL005690-RA	1551.21	1806.09	1216.53	941.373	679.254	750.31	1170.27	820.924	740.527	967.335	cyclophilin-6
AAEL005705-RA	1007.82	3268.66	9722.22	18225	12508.5	4741.97	1374.55	1327.69	1343.18	786.761	glucosaminephosphotransferase
AAEL005728-RA	9589.03	11742.5	10741	7758.12	4276.24	2798.83	4146.67	6025.48	6260.54	6085.46	glycyl-tRNA synthetase
AAEL005730-RA	1353.68	2280.12	3083.23	2590.57	1560.16	1097.21	1510.86	1253.01	1046.28	967.017	cop9 signalosome complex subunit
AAEL005766-RA	7450.05	14605.1	19815.3	21384.5	15243.5	9361.01	9221.59	18120.8	19636.1	12307.3	fructose-bisphosphate aldolase
AAEL005766-RB	70403.6	143335	172800	159585	103107	39748	38919.8	123583	131917	150262	fructose-bisphosphate aldolase
AAEL005794-RA	292.673	988.092	1183.38	1138.64	437.796	190.565	361.791	293.249	271.653	291.38	conserved hypothetical protein
AAEL005801-RA	12741	17355.7	18332.7	13737.2	5616.72	2700.38	2157.27	6849.62	5719.27	4799.09	bifunctional aminoacyl-tRNA synthetase
AAEL005822-RA	648.825	2493.2	711.518	506.609	336.333	300.261	179.705	421.887	367.688	258.431	conserved hypothetical protein
AAEL005825-RA	1053.03	1361.91	2267.06	2999.83	2354.45	1895.11	803.452	939.124	1016.39	897.691	translation initiation factor eif-2b beta subunit
AAEL005829-RA	55.9581	111.015	113.291	207.758	183.855	67.6471	72.6006	70.3562	108.529	66.0228	conserved hypothetical protein
AAEL005831-RA	386.202	638.546	759.68	421.805	204.501	201.818	522.463	355.908	272.665	302.689	hypothetical protein
AAEL005833-RA	1549.01	13604.2	19175.7	15661.5	11178.2	11493.7	8541.62	2323.06	4825.05	2001.11	cytosolic purine 5-nucleotidase
AAEL005856-RA	2965.81	17333.7	30361.1	19764.4	10143.3	4951.4	2296.32	2821.35	3195.75	2148.22	signal recognition particle receptor alpha subunit (sr-alpha)
AAEL005900-RA	6078.27	20744.9	52829.3	41061.2	17932.3	6175.75	1732.82	4745.19	3324.77	6978.02	conserved hypothetical protein
AAEL005944-RA	134.215	387.608	368.92	346.183	125.796	64.5523	218.743	130.754	92.0881	90.7048	Mitochondrial ribosomal protein, S23, putative_E1
AAEL005946-RA	4604.21	7025.85	7866.71	9863.4	7638.9	4665.89	4048.15	4371.69	4926.68	3864.68	nadh-ubiquinone oxidoreductase subunit B14.5b
AAEL005968-RA	1895.64	4006.84	6721.2	7895.49	5599.33	3225.29	1332.08	1388.26	1826.52	1714.23	conserved hypothetical protein
AAEL005990-RA	223.968	452.923	546.767	666.335	459.57	285.267	442.845	199.66	152.688	150.157	AaegAR_E1
AAEL006010-RA	1166.83	1672.98	3003.02	3860.3	2742.53	1713.87	1282.52	1008.12	898.207	1074.27	conserved hypothetical protein
AAEL006012-RA	1015.11	2151.88	2166.17	2120.05	1012.88	637.316	424.136	807.919	613.779	557.887	factor for adipocyte differentiation
AAEL006029-RA	1213.04	1998.6	2909.46	2920.73	2188.43	1702.34	1703.8	1003.31	1057.57	856.218	dynactin subunit	AAEL011590-RA dynactin subunit
AAEL006039-RA	3071.63	6414.48	8571.51	4032.25	2191.57	2046.34	2169.14	2157.64	2450.25	2249.61	dehydrodolichyl diphosphate synthase (dedol-pp synthase)
AAEL006040-RA	2598.73	5393.73	11047.2	10887	7116.12	4057.99	2395.35	2519.54	3141.64	3004.25	coatomer
AAEL006043-RA	186.999	426.754	252.093	204.095	129.854	110.751	209.22	199.846	270.408	181.065	gc-rich sequence dna-binding factor
AAEL006048-RA	2098.47	2735.11	3446.23	3091.53	1504.42	1070.34	1080.4	1758.97	1538.23	1858.23	interleukin enhancer binding factor	AAEL006048-RB interleukin enhancer binding factor
AAEL006049-RA	164.596	381.819	366.051	261.963	104.319	219.096	116.136	119.683	129.282	159.94	Mitochondrial ribosomal protein, S10, putative_E1
AAEL006059-RA	1262.15	1300.35	1601.21	1263.99	495	510.377	1378.42	903.936	612.776	827.204	conserved hypothetical protein
AAEL006065-RA	1864.74	3804.98	3362.94	1219.55	614.421	632.144	1857.22	1618.89	1806.49	1057.4	s-adenosyl-methyltransferase mraw
AAEL006066-RA	1722.1	2621.24	2922.21	2805.32	1223.59	695.012	604.899	1104.92	1223.33	1589.37	peptidyl-trna hydrolase
AAEL006079-RA	619.426	1604.04	1482.65	657.853	217.884	301.181	691.63	480.076	538.965	351.054	conserved hypothetical protein
AAEL006085-RA	3089.84	33725	35571.3	25353.7	16837	11104.6	3922.91	3645.09	6446.34	2546.21	methylenetetrahydrofolate dehydrogenase
AAEL006091-RB	746.855	1082.03	2095.94	2221.15	1289.21	829.576	499.711	638.488	655.774	541.82	rab6	AAEL006091-RC rab6; AAEL006091-RA rab6;;
AAEL006118-RA	3690.86	3331.59	4244.17	3484.45	1498.68	1379.77	2329.47	2571.63	2539.39	2611.04	Mitochondrial ribosomal protein, L55, putative_E2
AAEL006124-RA	4108.41	5078.62	4813.15	2737.24	1485.65	1076.48	1704.84	3582.59	2666.95	2703.43	conserved hypothetical protein
AAEL006133-RA	472.726	872.127	657.208	373.402	219.531	186.045	591.904	315.677	245.088	271.639	cofactor A, putative
AAEL006134-RA	639.538	1182.4	1439.25	2143.83	969.256	427.206	529.194	342.076	256.166	312.681	conserved hypothetical protein
AAEL006145-RA	215.857	630.333	771.462	842.708	452.909	512.004	519.436	239.141	272.39	168.991	dynactin
AAEL006147-RA	670.499	1357.55	1675	2009.95	957.966	659.123	1158.32	524.896	691.213	567.97	brain chitinase and chia
AAEL006155-RA	1239.87	2123.37	2291.19	2251.7	1079.79	294.087	635.525	1068.34	750.785	1162.67	conserved hypothetical protein
AAEL006174-RA	2082.8	2307.71	3096.21	4735.77	2317.33	2293.19	1878.72	1285.9	1365.98	1489.44	proteasome subunit beta type
AAEL006187-RA	2196.2	4487.51	4407.15	3414.92	1629.83	901.613	863.205	1005.54	1265.88	791.051	translational activator gcn1
AAEL006196-RA	421.569	1429.95	2456.96	4747.35	2870.59	1333.8	770.288	321.09	331.925	136.237	hemomucin
AAEL006207-RA	301.684	1475.31	491.295	184.91	395.705	215.944	313.433	193.414	270.728	394.171	conserved hypothetical protein
AAEL006231-RA	346.55	555.447	605.033	820.509	460.302	464.564	540.596	325.601	379.18	280.136	paraflagellar rod protein, putative
AAEL006251-RA	528.25	1283.53	2309.54	4238.92	2435.56	981.723	385.085	218.292	266.725	276.996	Ubiquitin-fold modifier 1 precursor, putative
AAEL006258-RA	68.5746	80.0035	154.454	323.533	202.835	118.855	261.424	56.4077	57.9189	48.3584	pickpocket
AAEL006263-RA	284.789	190.399	523.627	648.482	258.658	105.169	86.521	327.557	223.273	421.041	conserved hypothetical protein
AAEL006284-RA	325.373	715.916	836.035	904.734	623.242	359.45	391.578	243.791	347.381	294.364	hypothetical protein
AAEL006303-RA	3947.35	9263.13	21147.2	13778.2	7509.53	4043.7	2787.58	3389.15	2867.45	3107.28	integral membrane protein, Tmp21-I (p23), putative
AAEL006304-RA	1071.36	3405.24	7043.34	4211.15	2280.34	895.347	780.523	591.933	817.857	753.865	hypothetical protein
AAEL006309-RB	498.19	1065.28	1346.05	1386.76	1111.67	926.798	614.516	537.737	443.591	480.697	conserved hypothetical protein	AAEL006309-RA conserved hypothetical protein
AAEL006315-RA	6141.11	7570.41	11206.3	11618.9	7182.9	6829.08	6261.76	4346.32	3968.36	4000.23	26S proteasome regulatory subunit rpn1
AAEL006337-RA	9394.56	20376.9	38798.5	28943.1	11964.1	6236.15	7269.69	6605.92	6108.15	9658.78	conserved hypothetical protein
AAEL006341-RA	52.3759	95.1512	94.356	391.849	85.5629	53.8767	53.3727	64.4861	50.8885	57.5175	conserved hypothetical protein
AAEL006344-RA	214.397	606.125	1271.48	2916.35	2839.18	1826.25	1984.82	503.135	543.563	359.505	sulfotransferase (sult)
AAEL006356-RA	530.692	736.214	493.045	393.71	195.102	163.88	345.159	337.33	358.952	365.719	TFIIH basal transcription factor complex p52 subunit
AAEL006367-RA	781.805	1874.44	3993.25	3266.94	1628.28	798.941	746.737	691.171	692.684	887.139	conserved hypothetical protein
AAEL006373-RB	710.73	970.376	1181.44	2109.74	1437.93	906.322	890.899	704.901	1061.66	665.879	serine protease htra2	AAEL006373-RA serine protease htra2
AAEL006409-RA	1988.42	3152.99	6720.7	9397.86	4995.9	2674.36	2130.7	2381.81	1591.54	2175.91	sodium_channel_E3-4
AAEL006415-RA	8527.79	19414.8	22659.3	12722.2	5739.15	3484.34	2462.07	4734.07	5632.71	4435.41	leucyl-tRNA synthetase
AAEL006428-RA	1558.92	1928.68	1870.32	1408.34	1015.4	874.524	1334.07	1156.87	884.937	1205.78	ferredoxin, putative
AAEL006435-RA	2652.56	2281.19	3161.81	3060.72	1780.1	1191.83	987.372	1879.22	1619.71	2280.84	mevalonate kinase
AAEL006438-RA	193.894	653.716	1718.94	4413.68	2805.18	1021.21	601.296	176.903	255.737	139.757	dolichyl glycosyltransferase
AAEL006450-RA	1827.14	2248.67	6673.94	6985.42	4291.62	2485.24	1923.12	1482.7	1218.47	1559.08	integral membrane protein, putative
AAEL006457-RA	411.689	539.698	483.078	406.687	179.81	192.366	395.486	282.776	351.99	339.743	asparagine synthetase
AAEL006466-RA	558.375	4954.16	3239.16	2391.06	475.522	333.425	89.3134	126.091	173.205	108.256	chondroitin synthase
AAEL006474-RA	2816.33	7163.9	3613.6	2115.84	1169.57	1321.64	1879.65	2645.47	2003.89	2031.14	ATP-dependent Lon protease, putative
AAEL006489-RA	99.4819	229.5	139.494	184.037	71.3656	52.5956	96.3875	143.481	127.002	130.609	conserved hypothetical protein
AAEL006512-RA	383.355	823.958	1242.06	1451.94	1180.14	910.75	663.638	458.569	490.826	414.164	conserved hypothetical protein
AAEL006519-RA	1744.45	4962.87	5820.95	3990.39	2417.06	1516.8	986.312	1110.9	1514.42	1035.46	conserved hypothetical protein
AAEL006520-RA	497.058	1357.47	1524.93	1073.46	631.288	532.082	1124.82	505.705	891.629	368.651	hypothetical protein
AAEL006521-RA	1178.83	2690.49	2339.03	1670.83	752.211	582.882	1354.48	1094.5	1064.41	996.523	conserved hypothetical protein
AAEL006529-RA	567.463	916.515	1592.49	1872.2	1202.66	606.072	447.995	465.206	593.982	513.291	conserved hypothetical protein
AAEL006532-RA	518.427	631.822	495.399	480.467	205.584	209.828	407.951	412.186	418.273	370.396	histone transcription regulator
AAEL006545-RA	151.886	267.261	343.792	325.992	141.663	98.9519	166.59	113.274	140.462	139.038	hypothetical protein
AAEL006546-RA	183.19	363.144	476.787	513.749	176.741	118.295	234.2	136.838	172.608	164.17	hypothetical protein
AAEL006560-RA	1867.26	4544.55	12725.8	12056.1	5441.77	1862.62	1013.45	1517.94	1061.28	1221.43	cop-coated vesicle membrane protein P24
AAEL006562-RA	588.882	2229.66	671.657	68.9823	336.205	79.6257	214.887	111.891	71.8247	183.472	acid phosphatase
AAEL006569-RA	1174.4	1301.42	2006.16	3085.18	2788.2	1985.53	1173.23	1216.04	1376.58	996.94	hypothetical protein
AAEL006574-RA	209.393	975.803	611.988	372.273	190.786	116.475	185.222	210.662	185.43	263.607	nuclear transcription factor, x-box binding 1 (nfx1)
AAEL006577-RA	33080.4	42892.6	51421.3	53030.7	23729.8	8508.43	5092.14	18192.7	23621.3	19526.3	aspartyl-tRNA synthetase
AAEL006580-RA	240.934	3060.62	4027.1	4387.01	752.028	687.444	414.384	168.742	222.076	180.97	conserved hypothetical protein	AAEL011217-RA conserved hypothetical protein
AAEL006617-RA	9252.48	21095.3	22063.7	14901.9	4698.15	2145.97	1189.72	4353.07	7974.77	5233.5	conserved hypothetical protein
AAEL006621-RA	1837.56	3851.5	9396.44	13600.6	6593.63	2519.5	2516.37	2188.62	2132.74	1866.79	conserved hypothetical protein
AAEL006627-RA	42.6886	60.2919	72.123	109.751	61.8841	47.7856	68.265	70.4267	69.913	39.682	serine-type enodpeptidase,
AAEL006634-RA	5207.72	15964.5	16011.1	17628	8902.38	3805.85	1354.56	3567.49	3679.35	2733.08	acetyl-coa acetyltransferase, mitochondrial (acetoacetyl-coa thiolase)
AAEL006641-RA	4309.67	8424.45	6816.92	3572.97	2628.01	2894.48	4456.4	3228.37	2392.59	2939.69	conserved hypothetical protein
AAEL006643-RA	386.235	625.865	567.98	492.311	255.401	193.342	432.312	294.09	263.386	324.358	conserved hypothetical protein
AAEL006645-RA	7481.64	17493.1	13616.2	6710.47	4375.9	4513.2	7076.65	6075.01	4462.64	5908.09	conserved hypothetical protein
AAEL006688-RA	733.089	1146.65	1393.14	2325.19	1043.46	734.544	978.93	627.595	1007.29	768.062	conserved hypothetical protein
AAEL006727-RB	3633.8	6866.29	6293.24	5835.79	2474.59	1322.1	1009.73	2166.7	2699.12	1705.56	multisynthetase complex, auxiliary protein, p38, putative	AAEL006727-RA multisynthetase complex, auxiliary protein, p38, putative
AAEL006733-RA	508.068	795.061	1147.87	1286.16	882.858	670.769	685.294	465.996	407.03	439.877	fad nadph dehydrogenase
AAEL006757-RA	167.74	338.995	486.952	792.457	641.671	618.5	472.518	141.725	149.334	110.392	hypothetical protein
AAEL006762-RA	215.004	275.411	293.166	750.862	338.046	321.522	281.99	115.99	206.916	133.618	conserved hypothetical protein
AAEL006771-RA	4774.32	4757.65	6469.95	9481.26	5530.08	4332.72	4484.2	4307.29	3516.43	5051.62	conserved hypothetical protein
AAEL006779-RA	2951.31	3575.52	4356.4	3089.85	1667.2	1414.37	2442.45	2112.99	2047.67	2232.26	cytochrome c oxidase assembly protein cox11
AAEL006781-RA	270.127	513.411	322.234	352.602	219.786	156.708	248.593	151.646	254.55	208.301	hypothetical protein
AAEL006799-RA	452.039	827.2	817.29	499.388	211.534	270.932	318.6	401.542	284.63	370.027	conserved hypothetical protein
AAEL006808-RA	2317.53	5788.64	9214.79	3508.04	2283.98	1724.96	2002.77	1907.51	2609.62	1630.78	conserved hypothetical protein
AAEL006819-RA	310.924	471.256	326.184	202.077	130.211	129.038	123.72	176.737	141.762	221.766	conserved hypothetical protein_E1
AAEL006836-RA	41893	59699.9	62540.5	47593.1	37753.5	25866.6	16261.4	28888.9	27770	53863.6	dihydropteridine reductase
AAEL006836-RB	32924.7	62346	64820.9	59418.1	39348.2	22203.1	16034.5	32398.6	24985.2	43247.4	dihydropteridine reductase
AAEL006880-RC	961.337	1279.08	1934.52	1995.01	1076.17	462.767	384.122	1151.59	1104.5	1103.68	rab32	AAEL006880-RB rab32; AAEL006880-RA rab32;;
AAEL006894-RA	57.6984	113.511	75.8909	57.8903	45.8878	46.6655	70.6672	61.1118	62.6411	49.4921	hypothetical protein
AAEL006908-RA	1419.42	1358.04	2020.37	2731.18	1951.16	1725.23	1385.33	1170.84	1142.18	1271.87	conserved hypothetical protein
AAEL006912-RB	453.186	1229.18	1174.06	682.294	645.08	388.995	527.113	403.094	385.157	349.315	acetyl-coa acetyltransferase 2,	AAEL006912-RA acetyl-coa acetyltransferase 2,
AAEL006917-RA	739.147	866.093	1112.77	1737.7	1573.75	1297.15	771.831	705.009	753.884	405.017	MG-160, putative
AAEL006919-RA	53.5167	79.3642	115.425	226.57	151.027	123.672	113.499	50.1789	48.8341	57.9901	serine-type enodpeptidase,
AAEL006928-RA	6290.72	8173.39	10589.6	13124.3	8891.34	6619.63	7028.57	7961.72	8871.65	4040.28	dihydrolipoamide dehydrogenase
AAEL006934-RA	151.708	278.372	191.153	269.235	154.828	111.402	140.617	155.56	147.475	143.169	mediator complex, subunit, putative_E2
AAEL006938-RA	494.7	698.377	639.638	506.92	253.929	117.57	398.847	321.235	233.621	355.724	conserved hypothetical protein
AAEL006991-RA	174.016	186.58	173.533	208.31	52.6237	45.1168	97.5577	119.119	107.335	163.636	conserved hypothetical protein
AAEL007036-RA	39.1219	39.5593	39.9089	154.437	37.7062	37.3622	37.2995	34.2711	36.7738	35.5253	runx1 (aml1)
AAEL007049-RA	1645.16	2676.58	3433.88	6363.85	3848.29	2648.24	1974.33	1349.55	1176.93	1361.23	proteasome subunit beta type
AAEL007052-RA	40.4268	44.9453	62.658	255.262	46.0711	45.1837	40.5919	45.7247	41.1461	41.9639	lipase
AAEL007102-RA	37.3312	43.0586	43.4022	80.1542	44.0616	38.2881	45.5578	42.9358	41.868	37.0791	Trypsin, putative
AAEL007105-RA	155.401	219.654	524.505	780.869	437.827	529.551	432.3	143.082	205.428	108.451	conserved hypothetical protein
AAEL007113-RA	4198.96	9826.19	11924.1	14583.7	12439.3	8323.86	5332.3	2473.67	2957.59	2344.08	selenophosphate synthase	AAEL007113-RB selenophosphate synthase
AAEL007130-RA	1034.86	1665.58	1412.87	957.357	555.994	498.912	1026.28	640.488	829.844	653.585	leucyl-tRNA synthetase
AAEL007132-RA	2859.49	5042.54	5648.58	5401.07	3947.56	3370.14	3388.26	2186.88	2218.55	1469.25	dynein heavy chain
AAEL007166-RA	130.432	238.134	138.152	290.79	59.924	80.489	73.1807	79.3455	86.682	79.2701	hypothetical protein
AAEL007182-RA	533.563	880.627	1085.8	1166.56	739.49	619.691	655.202	507.177	699.83	427.164	hypothetical protein	AAEL010192-RA tripeptidyl peptidase ii
AAEL007226-RA	4147.17	8116.57	22771.9	38928.5	36561	31147.6	6757.79	1607.97	1636.34	1667.1	nidogen
AAEL007229-RA	730.097	2693.33	4320.84	5507.29	3679.12	1813.04	1165.32	947.527	669.822	715.546	conserved hypothetical protein
AAEL007254-RA	729.939	2231.4	2269.75	1530.19	932.672	716.785	957.995	715.2	656.105	464.183	metalloprotease
AAEL007261-RA	969.82	2888.16	5499.49	5263.95	2848.42	1886.74	1440.12	777.239	1023.25	1464.75	conserved hypothetical protein	AAEL007261-RB conserved hypothetical protein
AAEL007286-RA	2047.15	11141.1	25669.2	27087.6	10644.4	3363.79	2058.62	2472.35	1931.9	1820.8	arginine-rich protein, putative
AAEL007307-RA	1112.3	1664.67	2251.21	2358.19	1774.14	1477.71	1194.34	804.991	959.081	1009.32	conserved hypothetical protein
AAEL007308-RA	977.488	2562.18	11692.7	13965.5	6169.93	2002.58	977.729	1226.55	953.224	1332.66	glycosyltransferase
AAEL007309-RA	1254.56	1931.43	4824.47	4582.34	1615.59	719.292	865.456	795.384	536.488	1303.1	conserved hypothetical protein
AAEL007332-RA	822.65	1234.1	1611.92	1867.58	1228.34	1145.29	1050.24	610.005	625.529	838.605	cornichon protein, putative
AAEL007346-RA	185.101	312.899	227.229	214.619	82.433	103.017	127.93	264.102	173.203	213.08	hypothetical protein
AAEL007355-RA	4365.59	7091.19	8295.29	5871.95	2802.66	2534.88	3147.12	3692.07	2678.63	3124.23	Mitochondrial ribosomal protein, S18A, putative_E2
AAEL007356-RA	1734.73	3703.15	4377.83	2034.64	557.645	435.289	517.414	967.771	914.867	861.775	conserved hypothetical protein	AAEL007356-RB conserved hypothetical protein
AAEL007366-RA	778.776	1681.86	2148.73	1482.78	593.746	540.09	497.472	430.545	502.224	587.928	conserved hypothetical protein
AAEL007395-RA	2250.07	9169.04	10137.4	4900.73	2026.9	1550.56	1936.05	1747.05	1436.52	1638.67	conserved hypothetical protein
AAEL007400-RA	2901.27	7399.33	15303.9	11928.9	6594.62	3414.97	2322.54	1473.59	1770.29	903.57	signal recognition particle 54 kda protein
AAEL007423-RA	1109.58	2330.97	2699.5	2442.86	1202.74	1048.31	1482.95	999.49	1141.24	792.474	conserved hypothetical protein
AAEL007431-RA	11445.9	14694.9	10807.3	4370.95	1315.17	1138.13	1483.74	4293.22	4113.25	6567.35	conserved hypothetical protein
AAEL007441-RB	6807.59	37571.7	86330.7	83846.6	42546	17495	3362.73	4205.41	4095.06	3732.95	translocon-associated protein, gamma subunit	AAEL007441-RA translocon-associated protein, gamma subunit
AAEL007462-RA	1543.6	2190.1	3999.17	5629.96	3565.37	2705.3	2151.6	1230.8	1234.9	1333.7	conserved hypothetical protein
AAEL007472-RA	1151.81	3117.03	5551.46	6476.58	2739.08	1052.72	899.514	880.187	900.064	776.201	conserved hypothetical protein
AAEL007481-RA	53.6801	66.8591	130.928	196.939	82.5456	42.754	55.0486	63.3151	49.3501	45.0352	fucose_transporter_E1
AAEL007483-RA	78.3483	108.479	95.4377	203.706	100.747	123.647	129.878	68.5866	80.5245	57.4185	conserved hypothetical protein
AAEL007484-RA	1171.24	6647.8	7891.18	7704.37	3947.18	2682.05	1509.35	965.279	1508.24	960.395	protein transport protein sec23	AAEL007484-RB protein transport protein sec23
AAEL007485-RA	311.172	826.234	620.785	502.464	307.64	305.179	287.315	255.191	676.775	285.264	sodium-dependent phosphate transporter
AAEL007490-RA	22538.6	22638.5	25004.6	21517	14487	9450.75	9067.39	18765.9	19144.4	18507	conserved hypothetical protein	AAEL007490-RB conserved hypothetical protein
AAEL007506-RA	1045.82	2615.42	3826.87	4523.68	3585.01	2096.15	994.505	1026.95	1473.34	756.02	lava lamp protein
AAEL007512-RA	670.371	1489.69	988.838	518.548	329.725	232.628	427.651	551.436	441.884	477.567	atp-dependent rna and dna helicase
AAEL007532-RA	505.085	858.282	1337.19	1118.6	593.62	465.038	411.675	420.55	316.379	458.795	conserved hypothetical protein
AAEL007541-RA	825.437	1572.96	1478.06	1110.99	1004.68	929.588	819.462	718.001	1114.51	794.445	dna polymerase delta small subunit	AAEL007541-RB dna polymerase delta small subunit
AAEL007549-RA	564.007	786.226	803.274	1436.34	1324.33	739.485	546.841	296.263	617.783	311.258	phosphatidylethanolamine-binding protein
AAEL007555-RA	2493.37	52204.5	57255.5	24366.4	6908.16	3157.01	517.843	4936.53	7052.1	3458.46	acyl-coa dehydrogenase
AAEL007565-RA	4277.81	7167.87	3228.65	1280.25	918.624	921.717	2771.91	3604.09	4266.96	2244.06	leucine rich protein, putative
AAEL007566-RA	1063.69	1462.69	2273.67	2757.14	1744.93	1656.79	1526.42	1010.03	961.001	1132.65	dynactin subunit P25
AAEL007587-RA	67.4569	142.663	232.7	267.132	424.827	102.721	207.716	69.9956	93.1839	82.0413	conserved hypothetical protein
AAEL007634-RA	1101.9	2068.73	5850.2	10979.2	4386.37	1490.92	952.576	937.267	932.024	1188.05	conserved hypothetical protein
AAEL007639-RA	9044.57	7920.12	9443.5	6101.49	3898.17	3680.75	4211.62	4082.75	5004.24	5082.71	conserved hypothetical protein
AAEL007647-RA	4111.32	3855.94	4146.54	3073.95	1549.32	1548.82	2046.23	2353.75	2443.93	2561.28	conserved hypothetical protein
AAEL007660-RA	2875.39	3316.76	5498.38	4676.27	4125.48	3638.83	2902.86	2450.55	3898.96	2211.64	suppressor of actin (sac)
AAEL007664-RA	108.669	121.488	119.934	253.397	84.4921	150.132	116.691	86.7526	92.3758	76.6942	nicotinic acetylcholine receptor subunit
AAEL007665-RA	45.1887	53.3385	51.8604	92.7042	58.4644	62.4852	59.6985	48.5162	57.1913	44.6347	hypothetical protein
AAEL007685-RA	184.625	303.759	322.362	196.497	117.179	117.701	66.0346	168.722	123.713	184.129	conserved hypothetical protein
AAEL007687-RA	1188.85	1701.23	3038.89	5049.67	4269.78	2908.65	1438.02	1059.62	1248.25	716.537	transmembrane 9 superfamily protein member 4
AAEL007693-RA	55.1832	74.0148	68.7188	179.727	100.098	67.7679	85.3994	68.1267	107.607	66.3984	Organic_transpt_E1
AAEL007713-RA	3219.3	6324.97	7231.92	3901.8	2942.34	2598.33	2605.49	2628.93	2037.41	2735.67	viral IAP-associated factor, putative
AAEL007725-RA	2814.72	5391.68	8431.31	7037.75	5889.64	4132.96	3268.94	2099.13	1993.16	1662.59	reticulocalbin
AAEL007752-RA	7761.47	13884.5	12035.5	15412.6	12359.8	6507.79	4603.68	8738.87	13479.8	8287.28	cytochrome c oxidase, subunit VIIA, putative
AAEL007760-RA	4406.18	5312.64	7981.92	8435.52	4713.08	3951.71	3703.65	4409.96	2710.4	3930.12	mct-1 protein
AAEL007802-RA	459.782	3073.42	1719.07	1197.08	1113.52	1177.44	554.956	190.094	325.435	260.334	multicopper oxidase
AAEL007809-RA	88.1857	115.304	448.882	1004.08	453.562	97.7305	86.0045	70.8173	78.0959	58.3457	potassium_transpt_E1
AAEL007811-RA	1535.56	3229.45	8317.67	8626.64	4972.97	2920.37	2590.89	1424.58	1701.34	1128.81	short-chain dehydrogenase
AAEL007822-RA	963.723	1573.18	2265.53	2725.85	1948.2	1449.23	1724.59	724.379	1157.17	793.307	ubiquitin-conjugating enzyme E2 g	AAEL007822-RB ubiquitin-conjugating enzyme E2 g
AAEL007847-RA	1224.57	1334.16	2358.12	4726.63	1826.41	1614.35	890.198	910.92	682.528	948.175	conserved hypothetical protein
AAEL007854-RA	196.429	702.186	959.57	1293.32	948.724	416.126	387.721	221.892	243.627	175.952	pelota
AAEL007864-RA	461.182	601.239	419.754	407.977	333.228	235.505	449.314	397.082	368.485	418.74	zinc finger protein
AAEL007868-RA	26806	23581.8	25505.4	24061.7	15820.9	10660	10927.2	18831.1	18871.9	19668	ubiquinol-cytochrome c reductase complex 14 kd protein
AAEL007891-RA	1487.07	3001.57	6942.5	9797.81	6367.91	2828.99	1392.89	1512.68	1211.5	900.052	xtp3-transactivated protein b	AAEL007891-RB xtp3-transactivated protein b
AAEL007893-RA	2099.76	2726.41	5283.56	4113.95	2745.63	2084.51	2124.79	1425.6	1293.43	1665.8	short chain type dehydrogenase
AAEL007899-RA	351.519	708.489	396.942	297.048	218.249	66.9193	223.115	207.615	182.216	279.954	spermatogenesis associated factor
AAEL007903-RA	107.262	336.657	364.765	351.729	146.62	118.851	112.795	75.4907	79.242	85.1625	hypothetical protein
AAEL007907-RA	325.98	532	538.903	876.186	522.082	469.829	568.097	242.908	228.965	490.955	serine/threonine protein kinase
AAEL007936-RA	2735.56	5180.94	11221.8	8097.9	4520.68	2996.82	2585.14	2908.24	2626.89	2431.71	conserved hypothetical protein
AAEL007944-RA	3474.51	3592.13	4312.07	6572.09	5022.73	4247.55	3323.04	2356.79	2616.06	2530.97	conserved hypothetical protein
AAEL007948-RA	361.965	2409.13	9304.01	12484.6	8308.7	6349.9	2400.72	1661.75	1416.51	1165.31	glutathione-s-transferase theta, gst
AAEL007950-RA	70.3881	179.759	122.321	89.2188	48.1532	56.4364	53.7241	70.5357	85.5342	65.4654	eps-15
AAEL007959-RA	735.088	1448.21	2688.54	3482.82	1850.71	1025.06	453.406	427.316	400.66	358.732	conserved hypothetical protein
AAEL007987-RA	1421.88	2073.74	3451.57	3229.69	1638.94	692.702	382.06	1589.97	1353.89	1884.49	SEC63 protein, putative
AAEL007988-RA	1283.28	1881.03	2822.61	3652.19	2244.66	1849.89	2245.76	1199.73	1388.98	1467.39	conserved hypothetical protein
AAEL007999-RA	56.7516	172.204	181.767	288.889	94.4664	157.537	75.9817	52.2735	95.4416	60.5236	conserved hypothetical protein
AAEL008000-RA	166.182	992.326	1464.11	1824.01	950.485	726.188	368.323	187.625	190.248	116.907	golgi reassembly stacking protein 2 (grasp2)
AAEL008044-RA	619.648	1604.55	1778.01	1286.49	606.569	344.319	917.454	659.718	751.113	553.297	conserved hypothetical protein
AAEL008064-RA	909.777	1702.22	3781.49	6002.69	2696.62	1319.52	944.983	677.421	1126.96	1001.13	conserved hypothetical protein
AAEL008072-RA	7491.56	8546.91	14284.9	19342.6	12445.6	8472.27	7142.93	8292.81	7017.91	7305.16	nadh-plastoquinone oxidoreductase
AAEL008073-RA	14302.2	15134.7	7004.94	1725.15	1894.21	2372.97	8362.24	9729.9	6113.26	6116.68	conserved hypothetical protein
AAEL008128-RA	13110.4	17600.3	17452.8	12099.1	4359.83	3813.79	3550.77	9333.46	8581.54	8608.77	mitochondrial inner membrane protein translocase, 13kD-subunit, putative
AAEL008133-RA	9026.82	8856.18	10860.9	6620.48	4246.18	3984.57	6282.38	7184.04	5975.58	7801.2	gtp-binding protein hflx
AAEL008135-RA	1475.46	1845.94	3015.12	2927.08	1650.29	1218.05	1553.54	1175.94	1503.1	1369.66	conserved hypothetical protein
AAEL008145-RA	2145.65	3356.77	3419.71	1994.45	927.279	1050.77	2056.09	1560.95	1448.65	1936.41	conserved hypothetical protein
AAEL008149-RA	130.657	288.935	285.554	186.386	83.6819	63.4018	145.147	103.048	115.037	120.264	conserved hypothetical protein
AAEL008166-RA	12369.1	20891.3	23237.3	26034.3	13772	6073.04	8534.26	16314	18106.6	12498.7	malate dehydrogenase
AAEL008167-RA	17367	45442.5	54560.3	34063.4	22656.5	16364.5	12349.3	12431.8	10554	12939.9	aspartate ammonia lyase_ORF	DS|2121|VB|AAEL008167-b|aspartate ammonia lyase|ORF; DS|2120|VB|AAEL008167-a|aspartate ammonia lyase|ORF; DS|2121|VB|AAEL008167-b|aspartate ammonia lyase|ORF
AAEL008169-RA	2963.86	3304.24	3526.71	4421.11	2551.73	1685.1	1567.79	1670.49	2111.61	1817.92	30S ribosomal protein S12	DS|0678|AAEL008169|30S ribosomal protein S12|E1; DS|0678|AAEL008169|30S ribosomal protein S12|E1;;
AAEL008170-RA	440.759	651.716	1195.99	1431.92	943.388	738.367	898.499	386.312	543.14	522.874	conserved hypothetical protein
AAEL008185-RA	580.477	976.58	1199.19	747.277	410.187	345.405	474.16	684.248	572.397	658.154	conserved hypothetical protein
AAEL008211-RA	270.12	376.598	670.775	1030.7	510.626	418.366	344.232	186.841	298.544	199.826	mitochondrial carrier protein
AAEL008222-RA	374.471	2206.75	1439.44	499.499	211.32	112.867	913.081	254.994	665.593	91.9625	lipase
AAEL008223-RA	165.478	234.639	326.504	608.489	310.818	288.294	332.851	146.465	133.85	155.602	conserved hypothetical protein	AAEL011237-RA conserved hypothetical protein
AAEL008248-RA	10339.2	10973.6	7784.1	6440.64	5933.56	4314.11	3098.01	4808.71	8933.54	4259.63	conserved hypothetical protein
AAEL008255-RA	307.271	672.953	866.156	1345.94	594.857	406.356	781.934	381.299	376.959	371.561	mbp-1 interacting protein-2a
AAEL008257-RA	2116.28	3391.38	4007.54	3560.44	1716.6	778.406	571.914	1703.59	1389.4	1456.4	heterogeneous nuclear ribonucleoprotein 27c
AAEL008291-RA	5985.33	7002.23	9240.53	10741	6749.33	6848.74	6316.38	4150.75	5141.76	3774.23	conserved hypothetical protein
AAEL008317-RA	2185.57	3038.1	2852.52	1607.4	673.95	424.089	791.281	1127.03	1361.44	744.266	conserved hypothetical protein
AAEL008319-RA	1508.27	2414.62	4136.49	4259.32	2215.06	867.73	730.204	1341.34	1067.75	1097.16	protein disulfide isomerase
AAEL008321-RA	44.2368	55.9504	52.7417	129.808	68.6535	76.0686	49.8039	40.9922	45.9732	43.9677	conserved hypothetical protein
AAEL008328-RA	1792.33	2770.56	3552.12	3886.47	3247.74	3187.33	2621.17	1714.46	2000.64	1832.64	conserved hypothetical protein
AAEL008330-RA	8152.42	11328.6	13098.9	15073.3	10992.8	5451.12	3031.3	6283.45	7633.97	5017.36	hexaprenyldihydroxybenzoate methyltransferase
AAEL008342-RA	469.819	1194.35	1188.17	965.189	374.056	392.561	302.66	172.61	490.368	245.902	AA_transpt_
AAEL008366-RA	4802.84	10251.9	17387.6	14739	5340.07	3256.62	3133.58	5969.29	9702.93	7064.97	pyruvate dehydrogenase
AAEL008367-RA	11326.5	19073.3	36910.8	50673.5	32732.6	15671.6	4970.48	6007.76	5076.63	5020.58	fk506-binding protein
AAEL008391-RA	1394.92	1448.88	1927.56	2368.56	962.61	698.177	1086.57	1094.28	968.11	1358.61	ptx1 protein
AAEL008394-RA	5582.44	8209.28	10283.2	9631.75	4834.81	3655.43	5675.27	7882.91	7665.67	6509.98	conserved hypothetical protein
AAEL008406-RA	2280.81	10663.7	7861.51	3666.2	2232.56	1980.53	1670.92	1260.52	1254.89	1863.69	AA_transpt_E4
AAEL008425-RA	1156.3	2292.9	3986.79	5133.21	3220.85	2212.59	1952.02	1215.66	951.9	1003.51	conserved hypothetical protein
AAEL008434-RA	2538.51	2368.44	5104.47	7223.85	3321.45	1481.94	791.7	2144.28	1463.6	2909.8	er lumen protein retaining receptor
AAEL008445-RA	187.707	382.337	256.903	235.772	146.833	93.1191	194.695	187.018	159.733	144.61	tuftelin interacting protein
AAEL008458-RA	850.922	1494.47	1800.7	2113.69	1420.54	1119.87	1197.08	679.601	723.203	811.953	conserved hypothetical protein
AAEL008459-RA	403.974	772.128	991.984	1921.91	1431.64	1056.01	724.138	315.629	382.543	256.193	conserved hypothetical protein
AAEL008461-RA	1892.53	4087.38	9171.52	10373.9	6573.74	4351.22	2325.17	1797.54	1945.94	1027.45	surfeit locus protein
AAEL008462-RA	382.204	1016.85	1178.92	1129.41	621.56	471.156	400.995	321.32	331.424	308.889	apl5 protein (spac144.06 protein)
AAEL008464-RA	40.804	78.8192	51.7872	56.7558	35.3653	38.4576	37.2799	61.6453	41.1672	36.3129	hypothetical protein
AAEL008474-RA	263.06	1029.13	667.848	271.191	101.46	100.221	672.158	193.32	250.322	228.589	glycerol kinase
AAEL008481-RA	357.428	693.173	711.559	1090.8	403.127	343.81	155.976	144.384	191.352	181.436	60S ribosomal protein L18_E1
AAEL008482-RA	362.584	570.621	621.177	405.626	192.19	235.209	275.187	262.522	262.175	299.421	hypothetical protein
AAEL008492-RA	170.083	416.768	447.337	558.756	229.422	138.125	132.712	122.082	105.879	130.45	conserved hypothetical protein
AAEL008509-RA	559.865	1323.26	1275.39	950.116	249.9	141.531	563.029	573.247	444.202	612.565	alanyl-tRNA synthetase
AAEL008517-RA	5442.23	7607.55	6325.21	2067.94	794.288	757.675	2420.17	3752.64	2419.49	2199.99	elongation factor tu (ef-tu)
AAEL008521-RA	1170.66	2432.93	5299.4	8311.49	5420.48	3406.5	2561.86	1451.94	1514.09	787.318	conserved hypothetical protein
AAEL008553-RA	569.831	1342.36	1246.08	1076.46	447.319	330.911	561.015	357.774	726.679	424.2	conserved hypothetical protein
AAEL008582-RA	1753.88	2307.96	2245.05	1174.93	844.901	538.652	1028	1141.03	1149.7	1246.65	30S ribosomal protein S2 (prokaryotic and organellar)	DS|0933|AAEL008582|30S ribosomal protein S2 (prokaryotic and organellar)|E3; DS|0933|AAEL008582|30S ribosomal protein S2 (prokaryotic and organellar)|E3;;
AAEL008594-RA	5037.38	9696.91	25526.5	35362.5	17227.4	7859.23	2735.85	2855.84	2994.17	3253.62	conserved hypothetical protein
AAEL008605-RA	2043.92	2063.29	2097.59	2915.45	1388.54	841.685	773.864	744.247	1175.46	977.57	inosine triphosphate pyrophosphatase (itpase) (inosine triphosphatase)
AAEL008613-RA	2042.93	3682.21	6056.92	6055.5	5064.46	3159.73	2214.91	2480.17	1834.79	1878.95	TraB, putative	AAEL008613-RB TraB, putative
AAEL008656-RA	124.717	735.537	1525.97	2452.71	1160.95	264.064	112.293	126.981	127.729	91.961	galactose_transpt_E1
AAEL008685-RA	35.6976	39.7685	41.408	82.5866	36.3373	42.8586	34.8671	35.8515	34.9561	37.9228	lim homeobox protein
AAEL008691-RA	214.823	297.344	206.287	139.591	75.4473	93.6141	95.7789	104.85	118.812	117.874	conserved hypothetical protein
AAEL008692-RA	5343.59	5867.14	10116.9	6372.46	4067.83	2848.19	2613.32	4912.24	3254.62	6073.33	barrier-to-autointegration factor, putative
AAEL008707-RA	85.0713	116.946	87.5701	174.768	58.0706	64.4751	66.3819	81.1592	90.6418	66.8999	hypothetical protein
AAEL008725-RA	649.267	1420.01	2541.25	2287.93	1102.43	774.233	801.696	570.668	560.763	688.869	conserved hypothetical protein
AAEL008740-RA	1438.4	2949.51	4617.24	6098.17	3547.75	1894.45	1412.56	1523.68	2218.34	1123.92	synaptic glycoprotein sc2
AAEL008741-RA	811.9	1390.59	886.298	744.346	384.786	394.767	814.559	579.295	487.365	650.165	importin (ran-binding protein)
AAEL008768-RA	165.109	643.628	454.162	223.629	99.3781	180.167	136.415	130.438	173.226	121.874	AaMBF1-A_EA3.2
AAEL008768-RB	6155.5	5672.83	6857.47	5928	2958.28	2963.21	3141.12	4505.74	3547.13	5518.43	multiprotein bridging factor, putative
AAEL008773-RA	540.61	1642.86	696.31	526.71	692.733	611.93	548.066	251.756	197.971	154.104	laminin A chain, putative
AAEL008786-RA	3951.28	4963.04	5215.1	7154.55	5177.78	2796	1653.72	2162.07	2453.68	1669.84	caax prenyl protease ste24
AAEL008800-RA	2442.71	3379.08	3944.77	2768.91	1620.08	1358.96	1959.64	2458.38	2109.73	2319.9	Mitochondrial ribosomal protein, S26, putative_E1
AAEL008811-RA	1231.75	2979.19	5337.87	3732.16	1240.35	875.552	1224.03	920.161	920.307	1196.54	conserved hypothetical protein
AAEL008828-RA	98.1395	319.914	370.187	363.43	114.378	90.5294	47.3513	99.2238	168.51	128.184	carbonic anhydrase
AAEL008834-RC	1221.07	2850.08	1387.28	1123.07	993.491	945.068	1246.99	1061.78	1102.75	872.423	conserved hypothetical protein	AAEL008834-RA conserved hypothetical protein
AAEL008864-RA	1196.09	2022.66	1563.24	1025.21	424.531	378.012	598.205	1000.5	805.333	1129.69	conserved hypothetical protein
AAEL008874-RA	1613.24	1779.83	2600.66	2823.34	1380.17	1221.57	2031.93	1144.04	711.045	1122.03	hypothetical protein
AAEL008875-RA	1694.56	1840.96	2629.72	2001.42	1169.15	1027.37	1921.37	1004.41	1106.97	951.729	conserved hypothetical protein
AAEL008878-RD	604.337	1154.12	4383.61	8826.54	5481.05	4382.34	656.174	504.356	554.237	561.112	diacylglycerol o-acyltransferase	AAEL008878-RB diacylglycerol o-acyltransferase; AAEL008878-RC diacylglycerol o-acyltransferase;;
AAEL008889-RA	567.323	1850.53	6710.23	13450.9	10867.4	10133.7	4462.23	858.421	944.828	452.601	cytochrome P450
AAEL008941-RB	1625.56	2280.36	1802.77	1055.4	921.156	560.689	883.622	1142.81	958.337	1562.23	conserved hypothetical protein	AAEL008941-RA conserved hypothetical protein
AAEL008943-RA	45.3715	47.6992	43.5192	132.921	44.627	50.9403	38.5693	40.5453	43.4629	37.4377	chromatin assembly factor 1, p180-subunit, putative
AAEL008945-RA	1386.79	1676.96	1940.23	1156.7	397.894	398.789	852.514	817.958	668.465	1062.76	conserved hypothetical protein
AAEL008984-RA	37.2591	43.3951	44.573	200.266	41.4732	59.8839	42.1625	50.0183	39.9287	43.0382	conserved hypothetical protein
AAEL009016-RA	364.384	789.32	423.759	339.856	425.109	273	459.844	202.26	326.292	270.547	glutathione-s-transferase theta, gst
AAEL009027-RA	591.036	1077.45	1222.64	1178.95	712.202	694.355	693.084	669.791	657.763	745.113	mediator complex, 100kD-subunit, putative
AAEL009039-RA	702.587	1254.06	1573.47	1299.07	745.963	504.394	698.89	458.731	528.892	637.968	conserved hypothetical protein
AAEL009066-RA	8461.16	10548.8	12295.5	15596.4	10448	6723.29	7090.24	8979.35	7958.92	5880.19	symbol, putative
AAEL009070-RA	94.6391	237.004	152.751	103.942	71.3919	55.6944	113.212	85.9619	99.2881	88.2333	hypothetical protein
AAEL009090-RA	676.262	1065.83	773.572	696.158	400.676	373.314	732.002	552.483	644.541	692.742	conserved hypothetical protein
AAEL009156-RA	889.308	1813.87	1282.54	644.947	227.88	130.545	251.908	493.783	497.944	612.862	trna (guanine-n(7)-)-methyltransferase
AAEL009174-RA	460.153	391.916	710.947	631.845	441.713	73.48	146.779	390.557	314.021	541.797	beta-1,3-glucuronyltransferase
AAEL009179-RA	1002.73	1267.19	1521.59	1128.14	554.508	370.978	1326.16	1052.68	790.714	826.593	molybdopterin biosynthesis protein
AAEL009217-RA	77.5065	147.272	112.316	85.5434	38.1132	42.3003	47.7345	62.2606	73.2148	60.9155	Mitochondrial ribosomal protein, S35, putative_E1
AAEL009224-RA	1205.13	1728.08	2352.25	1667.35	909.867	1018.09	856.398	1251.27	1362.7	1251.05	conserved hypothetical protein
AAEL009224-RB	916.047	1376.88	1910.71	1313.31	612.84	883.47	747.802	1016.98	1124.15	1008.64	conserved hypothetical protein
AAEL009225-RA	1522.75	2031.34	2517.65	2270.98	1371.63	849.566	1287.47	1273.66	1301.02	1005.46	mitochondrial ribosome recycling factor
AAEL009230-RA	37.2477	43.8334	47.5035	142.483	43.9716	46.2608	40.3172	43.3844	44.9223	41.5337	conserved hypothetical protein
AAEL009241-RA	340.368	884.233	797.998	686.397	622.916	279.506	393.1	243.748	309.92	186.86	translation initiation factor if-2
AAEL009271-RA	101.888	214.253	156.104	274.124	87.0886	75.1587	138.573	87.8076	141.181	97.0064	testin
AAEL009278-RA	1767.57	2110.07	2668.7	3960.56	2870.43	1808.74	2449.69	1274.17	1768.76	1229.58	conserved hypothetical protein
AAEL009281-RA	68.2262	188.502	68.9744	102.854	50.1202	52.2191	80.3877	66.5832	64.0748	50.9384	protein arginine n-methyltransferase
AAEL009287-RA	720.662	2188.45	1601.77	749.252	274.263	461.191	259.327	718.588	664.647	623.464	ran
AAEL009288-RA	64.3103	98.3134	108.427	129.254	60.1354	48.8994	54.7006	59.428	54.2655	47.0633	Mitochondrial ribosomal protein, L48, putative_E1
AAEL009289-RA	177.481	283.587	213.597	183.97	90.4099	114.707	152.441	177.858	194.925	151.897	eg:34f3.4 protein
AAEL009311-RA	221.076	406.001	656.138	448.284	339.342	295.058	140.526	290.138	205.898	187.371	3-hydroxy-3-methylglutaryl-coenzyme A reductase
AAEL009313-RA	99305.8	125817	98336.4	70616.7	50823.9	41263.7	23352.1	50640.6	59769.4	68954.3	elongation factor -1 beta,delta
AAEL009324-RB	1747.66	2744.77	3138.01	4277.24	2930.61	1927.7	1338.75	1762.72	2017.57	904.09	hydroxyacyl dehydrogenase	AAEL009324-RA hydroxyacyl dehydrogenase
AAEL009328-RA	90.7458	248.268	688.453	757.195	242.198	200.11	314.092	227.95	129.935	109.825	hydroxyacyl dehydrogenase
AAEL009340-RA	1827.81	2713.5	3504.1	3251.7	1901.57	1079.53	813.823	1259.13	1273.29	1249.63	biotin protein ligase
AAEL009345-RA	5269.01	10223	10786.2	3605.19	2349.1	1978.95	3645.2	4463.52	3501.15	3215.55	prohibitin
AAEL009350-RA	6577.23	10251	8044.07	2002.74	771.232	839.851	4254.96	6102.37	3433.89	3415.45	conserved hypothetical protein
AAEL009369-RA	564.314	1196.82	1121.82	1011.86	576.396	364.811	339.106	408.215	529.205	305.687	hypothetical protein
AAEL009373-RA	4656.18	5397.92	5559.66	5102.55	2081.07	1380.57	1833.19	2583.28	2658.06	3850.82	n-acetyltransferase
AAEL009379-RA	235.412	211.968	347.425	271.728	88.9127	52.4341	130.571	141.926	160.428	158.304	Mitochondrial ribosomal protein, L33, putative_E3
AAEL009396-RA	857.063	1632.15	1667.1	2048.56	1130.18	619.623	922.668	683.601	896.757	734.585	amine oxidase
AAEL009410-RA	490.637	1025.49	1198.53	883.913	258.686	164.469	278.569	442.796	528.952	544.632	amine oxidase
AAEL009412-RA	3665.91	4214.31	4085.76	3089.76	2582.19	2408.17	2530.71	1737.9	2786.62	1890.25	ligatin
AAEL009413-RA	1734.02	2575.27	2585.57	1764.16	694.631	499.941	1086.93	1354.52	1108.22	905.821	conserved hypothetical protein
AAEL009414-RA	6997.44	7002.73	9292.08	10646.2	9558.16	6143.82	5875.21	5468.37	6117.02	4001.23	nadh-ubiquinone oxidoreductase 39 kda subunit
AAEL009425-RA	885.924	1549.97	1103.87	1009.85	1101.02	838.096	647.822	369.979	618.299	359.016	hypothetical protein
AAEL009431-RA	1400.02	1905.7	1819.94	1187.52	773.529	912.797	1001.47	949.128	1081.2	1003.78	mitochondrial ribosomal protein, L10, putative	DS|0958|AAEL009431|Mitochondrial ribosomal protein, L10, putative|E2; DS|0958|AAEL009431|Mitochondrial ribosomal protein, L10, putative|E2;;
AAEL009497-RA	1127.15	7013.9	22234.8	14270.3	3732.49	1411.06	935.902	1365.85	1075.68	1280.16	phosphomannomutase
AAEL009501-RA	6132.76	6359.41	10895.4	10960	4760.77	2782.99	5394.9	6011.65	6193.04	5414.04	methylglutaconyl-CoA hydratase, putative
AAEL009505-RA	71.8973	166.509	123.254	213.185	123.702	119.686	93.7377	58.002	72.2759	68.0069	conserved hypothetical protein
AAEL009510-RA	1004.63	6660.78	7661.45	7478.98	3801.27	1740.66	692.657	1436.12	1292.81	356.649	glucosamine-fructose-6-phosphate aminotransferase
AAEL009512-RA	1332.37	2065.11	2599.14	3567.89	2658.38	1803.45	1961.66	1429.03	2013.07	1104.52	glycosylphosphatidylinositol anchor attachment protein, putative
AAEL009526-RA	1113.98	2003.38	2000.69	937.254	464.175	443.783	993.951	872.244	526.76	528.139	conserved hypothetical protein
AAEL009534-RA	6138.48	10220.1	9946.65	4151.99	2247.9	1824.71	3623.59	5570.14	3058.16	3074.71	dimethyladenosine transferase
AAEL009560-RA	421.974	616.939	1528.81	3232.32	2522.75	1800.53	615.824	477.181	449.171	445.158	apolipoprotein D, putative
AAEL009570-RA	820.449	970.99	2338.74	5412.69	3915.95	2716.26	1248.19	921.749	874.04	821.62	hypothetical protein
AAEL009589-RA	1269.72	2262.41	2023.99	1154.23	838.16	878.266	1465.25	532.193	426.728	529.418	conserved hypothetical protein	AAEL002064-RA conserved hypothetical protein
AAEL009590-RA	18560.7	20063.4	21059.9	16463	8955.42	7894.23	9067.41	11310	13049.7	13247.4	outer mitochondrial translocase subunit, putative	AAEL002076-RA outer mitochondrial translocase subunit, putative
AAEL009603-RA	2839.53	2906.97	2494.97	1933.34	460.945	336.596	619.555	1576.21	1049	1849.06	conserved hypothetical protein
AAEL009604-RB	1785.23	1670.14	2448.25	3287.62	2605.21	1723.03	1541.54	1582.4	1493.56	1757.37	conserved hypothetical protein	AAEL009604-RE conserved hypothetical protein; AAEL009604-RA conserved hypothetical protein; AAEL009604-RC conserved hypothetical protein; AAEL009604-RD conserved hypothetical protein
AAEL009608-RA	3374.07	4108.26	4253.72	2587.46	1503.28	1484.87	2247.27	2524.29	1681.06	2611.94	28S ribosomal protein S16, mitochondrial_E3
AAEL009634-RE	175.275	288.975	344.432	712.771	341.292	276.74	201.399	91.2212	121.075	107.963	steroid dehydrogenase	AAEL009634-RA steroid dehydrogenase; AAEL009634-RB steroid dehydrogenase; AAEL009634-RF steroid dehydrogenase;
AAEL009634-RG	5545.24	9390.84	10098.1	7947.87	4998.35	4595.44	2830.34	2724.74	2315.56	2353.57	steroid dehydrogenase	AAEL009634-RC steroid dehydrogenase; AAEL009634-RD steroid dehydrogenase;;
AAEL009647-RA	18345.4	22084.7	24529	12948.8	7896.4	5084.12	13779.1	11912.7	7528.28	7112.59	conserved hypothetical protein
AAEL009669-RA	13981.8	34008.8	40423.1	45687.4	19191.7	10399.6	4829.44	5377.79	5632.27	5384.83	conserved hypothetical protein
AAEL009671-RA	1207.98	1452.64	1445.99	2063.73	579.162	266.937	730.318	760.43	892.822	1309.08	snrnp sm protein
AAEL009678-RA	194.367	354.783	554.925	569.053	274.544	82.8675	164.392	270.579	195.141	238.984	golgi-specific brefeldin a-resistance factor
AAEL009708-RB	353.54	625.768	1141.39	1643.89	887.67	655.137	881.058	344.921	464.802	352.029	thioredoxin M, putative	AAEL009708-RA thioredoxin M, putative
AAEL009731-RA	1090.42	2460.3	2775.51	2200.04	1524.97	1703.43	1442.14	1507.5	1265.05	930.02	epsilon-trimethyllysine 2-oxoglutarate dioxygenase
AAEL009748-RA	433.547	1217.04	1817.85	2074.57	1177.31	953.294	1080.95	623.857	704.329	393.425	2-hydroxyphytanoyl-coa lyase
AAEL009761-RA	43.7854	47.1844	47.7911	390.386	39.7109	43.1225	38.9908	40.0018	43.4107	38.4642	conserved hypothetical protein
AAEL009764-RA	1145.8	1907.82	2675.64	2872.87	1640.73	1596.26	1804.94	872.965	1035.33	731.429	xaa-pro aminopeptidase	AAEL009764-RB xaa-pro aminopeptidase
AAEL009766-RA	4363.48	29574.5	25333.3	15587.5	5702.13	2547.83	427.593	3129.89	5561.43	3599.36	lipoamide acyltransferase component of branched-chain alpha-keto acid dehydrogenase
AAEL009772-RB	1059.55	1702.41	1741.03	2251.31	1607.34	1276.06	1155.04	1001.05	1159	900.021	conserved hypothetical protein	AAEL009772-RA conserved hypothetical protein; AAEL009772-RC conserved hypothetical protein;;
AAEL009829-RA	885.471	5214.92	6153.32	6395.62	2876.99	1558.38	747.712	614.791	633.726	658.76	ARL3, putative
AAEL009833-RA	135.923	239.427	189.287	96.0088	44.6017	44.5846	68.3305	104.164	95.2263	65.3083	Mitochondrial ribosomal protein, L46, putative_E1
AAEL009875-RB	17911.6	80275.7	71050.9	40480	29936.5	25799.5	2955.17	5410.5	7001.07	2278.92	alanine aminotransferase	AAEL009875-RA alanine aminotransferase
AAEL009902-RA	6306.22	10782.9	7100.11	5317.58	3435.11	2579.3	1878.21	3147.31	5548.07	2945.15	eukaryotic translation initiation factor 3 subunit	SGR|0087|VB|AAEL009902|EUKARYOTIC_TRANSLATION_INITIATION_FACTOR3SUBUNIT|ORF; SGR|0087|VB|AAEL009902|EUKARYOTIC_TRANSLATION_INITIATION_FACTOR3SUBUNIT|ORF; SGR|0087|VB|AAEL009902|EUKARYOTIC_TRANSLATION_INITIATION_FACTOR3SUBUNIT|ORF; SGR|0087|VB|AAEL009902|EUKARYOTIC_TRANSLATION_INITIATION_FACTOR3SUBUNIT|ORF; SGR|0087|VB|AAEL009902|EUKARYOTIC_TRANSLATION_INITIATION_FACTOR3SUBUNIT|ORF;;
AAEL009908-RA	1318.26	1598.63	1724.63	1250.11	552.109	612.699	1429.8	1359.9	1407.51	1014.59	glutamyl-tRNA(Gln) amidotransferase, subunit-B, putative
AAEL009915-RA	200.635	290.471	311.592	358.781	140.607	79.093	154.565	116.283	107.286	106.728	centrosomal protein
AAEL009917-RA	507.113	1156.85	966.572	622.737	350.506	481.525	700.115	506.353	421.691	438.782	isoleucyl tRNA synthetase
AAEL009944-RA	2294.6	2751.66	2095.53	1220.05	579.563	771.532	1167.31	1199.21	1138.95	1708.12	conserved hypothetical protein
AAEL009946-RA	9026.96	21110.1	32857.3	26346.8	10321.2	7381.28	5831.71	7289.62	6175.43	5470.77	DnaJ homolog subfamily B member 11 precursor	AAEL013020-RA DNA-J/hsp40
AAEL009964-RA	16381.2	15327.4	16986.6	16801.1	10231.4	5578.41	5919.88	11471.4	10712.9	12503.5	conserved hypothetical protein
AAEL009967-RA	362.884	1153.92	1793.83	1207.96	1124.97	870.969	710.198	324.834	329.607	202.647	conserved hypothetical protein
AAEL009981-RA	3517.6	4380.21	4591.72	3237	1885.41	1526.85	2316	2998.99	2974.29	2467.59	chaperone atp11p
AAEL009995-RA	2649.27	2710.05	5423.94	9386.18	6040.33	3725.92	2053.83	2330.63	2304.11	2984.19	transmembrane protein, putative
AAEL010008-RA	8115.07	16567.2	26298.9	16625.1	3458.1	2266.47	4397.68	6743.6	4767.77	4416.56	crotonobetainyl-CoA-hydratase, putative
AAEL010012-RA	5624.94	8415.36	13694.1	11720.1	9601.38	8232	8408.19	6616.8	8850.15	8132.92	gtp-binding protein sar1
AAEL010030-RA	739.867	2073.98	1431.59	635.033	509.814	629.117	424.883	411.126	352.263	490.132	conserved hypothetical protein
AAEL010032-RA	31423.6	100257	171517	178620	82207.8	31061	13232.3	13682.5	12912.4	13586.3	translocon-associated protein, beta subunit precursor (trap-beta) (signal sequence receptor beta subunit)
AAEL010042-RA	5587.3	6873.01	7212.37	3821.77	2172.8	1946.59	3638.48	4675.55	3282.33	3616.37	conserved hypothetical protein
AAEL010051-RA	1305.92	1630.28	1204.13	712.12	604.655	544.148	1169.48	1091.89	1492.09	1149.88	cell cycle progression
AAEL010056-RA	130.94	578.832	790.943	1163.77	702.217	312.19	303.872	143.414	132.893	79.4563	hypothetical protein
AAEL010059-RA	4738.93	5265.63	3628.58	3292.84	3695.44	3489.81	1694.21	1794.07	4094.19	1563.17	ABC_transporter_E1+E2+E3
AAEL010060-RA	978.414	3080.99	5718.58	4955.47	2601.32	1315.44	978.452	888.516	777.819	635.432	signal recognition particle 68 kda protein
AAEL010065-RA	10722.3	46226.7	94100.9	83724.8	27808.2	9316.33	9489.43	20853	9005.47	5552.82	protein disulfide-isomerase A6 precursor
AAEL010071-RA	8341.82	7527.13	10087.8	7969.66	2239.4	1084.64	3335.56	8366.29	4283.99	7316.53	spermidine synthase
AAEL010101-RA	583.726	836.971	796.584	595.726	346.139	292.678	494.481	437.499	342.107	402.984	conserved hypothetical protein
AAEL010119-RA	535.953	774.654	1047.41	1637.58	587.097	290.122	456.683	424.898	383.592	802.075	ER-derived vesicles protein ERV14, putative
AAEL010128-RA	3401.18	4534.96	6641.07	12381.9	10232.9	7504.78	3776.44	5178.49	7407.56	3573.35	conserved hypothetical protein
AAEL010135-RA	262.423	964.732	1145.16	1013.22	412.729	220.444	249.711	277.283	246.603	261.832	conserved hypothetical protein
AAEL010141-RA	2228.39	3423.9	3325.19	1410.39	651.078	720.11	965.353	1360.13	1576.01	1472.18	conserved hypothetical protein
AAEL010143-RA	600.668	1175.87	1001.25	604.747	619.623	644.974	1075.31	691.318	796.777	631.267	isocitrate dehydrogenase
AAEL010181-RA	1677.5	2929.36	3727.45	3558.45	1294.72	887.752	1611.63	1354.31	1475.16	1434.48	Mitochondrial ribosomal protein, L51, putative_E1
AAEL010209-RA	331.417	589.795	737.973	1153.75	477.713	389.271	695.379	369.034	408.409	489.217	conserved hypothetical protein
AAEL010227-RA	7749.9	17417.3	84272.9	117262	45663.3	12395.5	5036.28	9895.27	5996.87	9081.69	dolichol-phosphate mannosyltransferase
AAEL010243-RA	297.946	732.246	1027.58	1729.11	1172.19	439.698	497.661	272.567	308.002	271.094	Abnormal X segregation, putative
AAEL010254-RA	2053.2	2497.31	3594.49	2577.46	903.586	804.616	1214.79	2056.92	1639.75	1539.04	conserved hypothetical protein
AAEL010261-RA	557.305	694.396	550.072	462.297	174.856	220.649	395.694	367.115	346.72	508.798	hypothetical protein
AAEL010271-RA	568.605	753.46	894.927	848.774	505.289	355.45	468.625	409.865	292.479	350.106	hypothetical protein
AAEL010276-RA	15284.8	44461.4	53278.4	41436.7	20080.4	15658.9	6642.18	6562.99	6001.36	3191.86	aminomethyltransferase
AAEL010283-RA	119.806	174.461	162.87	375.969	175.232	107.484	140.456	97.4826	125.444	100.395	conserved hypothetical protein
AAEL010296-RA	24000.2	24851	33555.1	24902.4	6710.53	4914.28	7108.47	11163	15630.3	13603.9	Carboxylase:pyruvate/acetyl-coa/propionyl-coa A_ORF
AAEL010321-RA	2076.55	2398.94	2145.47	1304.5	977.197	517.727	1112.49	1218.8	1049.87	1597.37	porphobilinogen deaminase
AAEL010333-RA	1161.91	2156.08	1888.51	850.474	685.585	486.493	732.165	802.435	884.632	753.356	conserved hypothetical protein
AAEL010336-RA	2736.95	4588.28	3678.67	1895.28	967.525	376.202	782.448	1892.7	1385.22	2140.26	zinc phosphodiesterase
AAEL010340-RA	1716.52	3249.15	4237.76	2883.73	994.333	862.422	816.664	2304.13	1787.46	2939.82	serine/arginine rich splicing factor	AAEL010340-RB serine/arginine rich splicing factor
AAEL010361-RB	868.64	1789.95	2780.98	1954.24	1675.33	988.16	600.403	1008.45	882.894	763.588	rer1 protein	AAEL010361-RA rer1 protein
AAEL010377-RA	137.715	792.494	406.097	109.966	64.9619	50.3089	50.2564	72.2121	61.0388	64.4307	conserved hypothetical protein	AAEL010385-RA conserved hypothetical protein
AAEL010379-RA	305.344	1674.64	910.83	535.129	289.234	253.534	230.866	128.017	243.274	119.128	atp-binding cassette transporter
AAEL010384-RA	756.965	3048.35	7105.81	1515.11	406.312	397.906	491.171	800.305	2811.06	769.998	aldehyde oxidase
AAEL010398-RA	297.342	2304.37	5407.56	9428.41	5755.64	5645.66	3478.55	475.79	885.413	407.914	hypothetical protein
AAEL010456-RA	1097.26	1657.62	1590.5	1038.99	424.966	368.278	773.845	708.845	754.018	764.061	conserved hypothetical protein
AAEL010464-RC	6063.52	15824.8	19379	16168.2	13005.4	6579.71	2755.25	9471.69	12247.6	7903.99	glutamate dehydrogenase	AAEL010464-RB glutamate dehydrogenase; AAEL010464-RA glutamate dehydrogenase;;
AAEL010465-RA	2268.2	2932.02	3755.93	4727.19	2866.1	1942.69	1440.9	1947.08	1666.2	1801.03	gpi-anchor transamidase
AAEL010468-RB	277.472	628.021	366.083	302.275	108.012	69.6055	224.835	186.742	247.561	234.332	DNA-directed RNA polymerase I, 12kD-subunit, putative	AAEL010468-RA DNA-directed RNA polymerase I, 12kD-subunit, putative
AAEL010476-RA	6060.81	23057.2	37464	20692.2	5696.72	3466.28	6606.45	7049.34	6621.05	5963.3	sil1
AAEL010485-RA	389.182	430.034	126.113	89.6557	85.3045	65.0652	157.73	179.203	206.901	99.9357	sugar_transporter_E1-2
AAEL010496-RA	633.818	1343.87	1832.16	2524.28	1506.8	959.665	688.839	609.557	496.786	495.387	conserved hypothetical protein
AAEL010504-RA	541.563	1059.59	2258.45	2606.29	1236.43	941.904	762.137	741.466	659.586	817.741	conserved hypothetical protein
AAEL010514-RA	33002.9	29774.1	31663.2	22919.8	8918.27	4990.05	4614.49	14964.7	18441.3	15132.2	aminoacyl-tRNA synthetase auxiliary protein, 43kD, putative
AAEL010520-RA	3287.43	4710.11	5676.87	7428.78	3296.34	2243.43	1926.63	2190.54	2177.22	1816.72	conserved hypothetical protein
AAEL010521-RA	1458.5	6341.99	15037.3	24478.4	10008.6	1969.18	898.607	1065.65	1272.47	596.965	ribophorin ii	AAEL010521-RB ribophorin ii
AAEL010530-RA	1715.98	2422.31	3652.7	2962.58	1557.42	1294.31	1248.88	1289.52	1044.17	1331.34	dual-specificity protein phosphatase, putative
AAEL010535-RA	9842.3	12134.4	13203.2	6547.86	2581.34	1613.07	2693.08	4586.8	5447.95	4509.25	conserved hypothetical protein
AAEL010538-RA	689.328	1459.24	2292	2631.26	2344.66	1716.11	1131.21	868.447	1124.14	812.082	conserved hypothetical protein
AAEL010584-RA	482.342	1068.69	1497.94	1348.08	701.284	594.696	529.629	579.619	393.54	402.974	vesicular mannose-binding lectin
AAEL010585-RA	3702.4	4373.78	6720.23	9125.05	6336.46	5215.54	3448.04	4223.53	3410.94	3916.61	spermatogenesis associated factor
AAEL010595-RA	727.486	766.228	907.356	542.811	204.251	91.9081	273.924	531.125	490.079	578.521	meiotic recombination repair protein 11 (mre11)
AAEL010596-RA	3341.47	14135.2	6641.15	5344.87	2937.82	2152.02	642.277	986.961	2590.7	1539.57	n-acetylgalactosaminyltransferase
AAEL010599-RA	2183.16	4855.65	8825.05	14724.2	6942.61	3046.87	1826.93	2326.94	2193.6	1385.07	neutral alpha-glucosidase ab precursor (glucosidase ii alpha subunit) (alpha glucosidase 2)
AAEL010613-RA	1600.34	3280.94	1715.54	657.185	294.73	177.823	659.953	758.762	628.468	616.142	conserved hypothetical protein
AAEL010617-RA	1049.09	1808.1	1020.84	789.144	511.273	559.139	800.161	729.714	644.962	675.881	DNA-directed RNA polymerase II largest subunit
AAEL010640-RA	2008.14	28607.7	28521.7	14851.1	4952.83	2620.34	827.751	2298.06	6563.62	3603.64	phosphoribosylamine-glycine ligase
AAEL010653-RA	431.875	766.663	851.775	2248.24	2501.37	1823.43	1233.59	385.199	461.454	346.434	alpha-l-fucosidase
AAEL010663-RA	376.042	405.914	435.505	239.133	93.5248	128.039	199.843	270.76	227.475	298.651	cleavage and polyadenylation specificity factor
AAEL010689-RA	444.297	939.265	1498.72	1150.45	608.295	407.269	1063.93	493.704	436.863	362.992	conserved hypothetical protein
AAEL010716-RA	14940.1	75038.6	115916	79961.8	39362.5	12218.3	2512.03	9258.5	7227.54	5553.71	preprotein translocase secy subunit (sec61)
AAEL010727-RA	1372.12	1844.03	2624	3125.31	1921.48	1170.71	1412.95	1308.84	1562.49	1021.16	glutaminyl-peptide cyclotransferase
AAEL010788-RA	111.194	226.646	259.571	405.909	116.477	69.7373	247.191	77.068	81.3009	77.5858	metalloprotease
AAEL010794-RA	8992.83	10621.5	27311.8	29805.7	13485.8	8582.64	7894.65	7684.49	8239.29	9719.04	prenylated rab acceptor
AAEL010796-RA	1236.94	1448.71	2335.15	2306.08	1606.93	1412.7	1583.73	973.553	720.194	1149.73	transmembrane protein 1/tmem1b
AAEL010809-RA	812.561	1138.91	1313.96	997.851	486.042	163.824	577.024	777.757	486.577	701.148	set
AAEL010834-RA	2819.14	5589.17	6970.23	5361.38	6230.5	4666.65	2859.58	2500.54	4057.5	2695.91	arf gtpase-activating protein
AAEL010840-RA	2529.03	2978.07	4057.91	6692.25	5721.99	4476.13	3185.83	2013.27	2692.97	1672.92	hypothetical protein
AAEL010844-RA	605.393	1285.2	2150.25	1996.38	1342.18	968.821	1002.12	678.414	629.515	501.21	ubiquitin-conjugating enzyme E2 j2
AAEL010846-RA	59.637	123.861	85.9146	172.035	68.7166	58.961	108.912	77.6651	75.6475	53.8949	hypothetical protein
AAEL010847-RA	461.421	497.192	468.863	411.646	186.922	196.486	368.589	480.907	405.948	416.547	zinc finger protein
AAEL010878-RA	529.129	684.365	579.582	403.621	241.865	215.977	374.539	208.207	244.092	265.534	conserved hypothetical protein
AAEL010885-RA	584.143	1189.03	678.967	392.642	217.981	128.094	208.701	416.981	372.203	543.936	conserved hypothetical protein
AAEL010895-RA	1300.72	2799.27	6643.7	7380.71	5210.72	3652.88	3067.33	1253.9	1116.42	1195.28	conserved hypothetical protein	AAEL010895-RB conserved hypothetical protein
AAEL010901-RB	1728.66	4104.84	9642.64	11205.2	5123.04	1450.18	907.267	1542.89	1460.96	1047.34	mannose binding lectin, putative	AAEL010901-RA mannose binding lectin, putative
AAEL010906-RA	958.217	1814.86	2349.29	1528.78	269.213	177.586	370.288	679.13	445.205	632.471	conserved hypothetical protein
AAEL010938-RA	560.548	2192.59	6699.75	12314.7	9485.24	6045.37	357.843	454.031	434.829	641.367	l-asparaginase
AAEL010939-RA	217.912	524.4	867.324	960.15	854.15	266.68	268.925	227.489	169.123	220.159	group ii plp decarboxylase
AAEL010939-RB	411.514	918.061	1247.27	1466.54	714.685	455.983	247.1	457.672	365.543	501.223	group ii plp decarboxylase
AAEL010952-RA	72.9643	140.395	256.576	480.028	179.129	143.974	49.9083	83.3697	84.9473	72.8517	temporarily assignedprotein name protein
AAEL011006-RA	123.744	606.578	678.832	400.913	154.294	100.496	204.399	115.295	133.343	78.3239	guanylate kinase
AAEL011010-RA	10472.4	6678.83	7865.94	9293.58	8494.94	5717.47	3673.06	4176.93	8342.79	6565.72	conserved hypothetical protein
AAEL011045-RA	295.613	541.977	635.64	1743.53	1601.99	1020.44	178.369	76.9612	76.362	81.3365	pupal cuticle protein, putative
AAEL011052-RA	954.159	1768.71	1051.21	474.495	307.323	213.628	579.722	544.297	633.13	550.743	conserved hypothetical protein
AAEL011057-RA	754.357	874.863	616.572	461.997	345.992	379.458	444.257	409.649	442.103	597.635	DNA-repair protein complementing XP-A cells homolog
AAEL011084-RA	399.883	597.132	735.262	1034.67	831.182	803.854	554.816	368.551	438.054	375.512	conserved hypothetical protein
AAEL011091-RA	2079.14	3278.74	2174.96	1340.26	1171.89	1384.4	1927.29	1504.07	1377.63	1369.09	retinal degeneration b beta
AAEL011103-RA	1985.99	1964.32	3504.4	3029.84	2102.4	1561.73	1430.34	1399.28	1366.87	2021.76	centromere/kinetochore protein zw10
AAEL011117-RA	412.738	871.436	828.742	899.862	492.809	432.698	514.031	400.16	398.198	336.554	histone deacetylase
AAEL011136-RA	7985.43	9566.71	14494.2	11533.5	7303.83	5974.5	8520.79	7488.78	7797.78	6740.27	arsenical pump-driving atpase
AAEL011137-RA	15741	66079.9	69023.3	35683.9	10997.8	7363.53	3072.9	11792.4	18289.2	19168.9	Succinyl-coa:3-ketoacid-coenzyme a transferase_ORF
AAEL011155-RA	1978.13	4163.78	3591.27	2255.88	900.952	583.305	1382.9	1324.44	1561.77	1608.05	conserved hypothetical protein
AAEL011157-RA	1579.49	2040.77	2380.02	4112.52	2581.22	1683.23	2154.87	1209.73	2131.51	1332.55	NADH dehydrogenase, putative
AAEL011158-RB	1014.85	2183.35	1790.26	1499.76	1058.84	908.65	786.045	901.667	807.718	1077.31	disulfide oxidoreductase	AAEL011158-RA disulfide oxidoreductase
AAEL011169-RA	58.5639	156.148	451.147	753.368	680.258	296.347	91.3562	50.4168	51.0002	44.3478	hexamerin 2 beta
AAEL011198-RA	4086.65	5899.23	6448.23	4095.85	1648.64	1330.5	2453.3	3604.9	3051.38	2589.02	Mitochondrial ribosomal protein, L38, putative_E4
AAEL011201-RA	1589.19	2592.96	1532.55	670.601	201.351	234.056	247.801	540.462	841.751	568.301	hypothetical protein
AAEL011224-RA	118.998	277.672	190.801	95.0458	52.1206	48.9398	198.399	76.9565	90.7132	71.3335	hypothetical protein
AAEL011244-RA	2993.87	3436.53	5636.85	9408.88	4438.07	2794.96	3816.19	3757.69	3443.86	2664.48	surfeit locus protein
AAEL011255-RA	67.763	116.95	59.9902	51.3897	38.1481	41.1567	40.1804	42.0465	46.0998	45.6775	gtp-binding protein-invertebrate_E1
AAEL011289-RA	5696.68	14880.2	14602.8	7200.62	3662.91	3537.41	5716.13	8547.27	9718.57	4449.66	conserved hypothetical protein
AAEL011292-RA	270.083	464.117	839.015	1253.82	1027.8	653.687	1041.35	450.522	642.804	285.041	protease m1 zinc metalloprotease
AAEL011340-RB	410.807	793.331	700.14	274.526	111.629	289.039	227.057	308.519	324.309	257.317	U1 small nuclear ribonucleoprotein 70 kd
AAEL011353-RA	1087.89	1361.21	1759.67	2994.43	1431.17	1120.05	837.823	736.562	628.306	705.54	conserved hypothetical protein
AAEL011355-RA	6652.66	6541.14	14548	13564.7	7978.19	5819.35	10510	11108.5	6124.68	4889.62	carnitine o-acetyltransferase A_ORF
AAEL011360-RA	233.49	507.371	469.419	420.78	210.273	154.71	282.348	203.089	201.549	161.292	conserved hypothetical protein
AAEL011382-RA	1184.69	1882.39	1428.32	850.137	334.836	316.766	572.294	1010.11	748.806	827.381	116 kda U5 small nuclear ribonucleoprotein component
AAEL011390-RA	4746.55	5209.23	5261.82	2918.63	1757.1	1676.67	2873.68	2904.26	2506.86	3474.15	Mitochondrial ribosomal protein, L9, putative_E3
AAEL011391-RA	673.878	1081.06	1163.13	672.138	340.639	437.124	508.09	441.62	397.871	435.872	Mitochondrial ribosomal protein, S9, putative_E2
AAEL011391-RB	1807.86	2383.6	2859.59	1457.47	793.715	781.358	1283.37	1564.59	1256.7	1219.71	mitochondrial ribosomal protein, S9, putative	DS|0785|AAEL011391|Mitochondrial ribosomal protein, S9, putative|E5; DS|0785|AAEL011391|Mitochondrial ribosomal protein, S9, putative|E5; DS|0785|AAEL011391|Mitochondrial ribosomal protein, S9, putative|E5;
AAEL011395-RA	2967.31	6318.35	6718.51	6039.25	3867.04	2727.51	1792.32	1667.12	2278.51	1420.71	glutaminyl-trna synthetase
AAEL011429-RA	3033.79	3231.18	5593.63	6636.72	4664.91	3534.13	3116.57	2263.46	2518.95	2589.12	clathrin coat adaptor ap3 medium chain
AAEL011433-RA	1165.31	1638	1586.34	1321.75	604.195	394.466	582.058	739.535	750.555	1056.45	small nuclear ribonucleoprotein sm d3
AAEL011442-RA	2068.36	2609.17	4411.36	4235.62	2659.18	1730.52	2175.81	1916.34	1964.56	2488.17	translation initiation factor eif-2b gamma subunit
AAEL011468-RA	3277.95	4199.27	5235.55	8891.17	6360.57	3718.81	2591.3	1798.46	2481.99	2424.56	protein kinase C inhibitor, putative
AAEL011476-RA	7649.51	7374.18	8297.45	3221.01	1681.9	1507.49	1123.49	2484.42	4504	1763.39	conserved hypothetical protein
AAEL011496-RA	548.238	1327.75	2275.62	2467.92	1318.52	877.473	903.371	537.894	627.422	764.223	chitinase
AAEL011506-RA	81.7871	70.1064	77.1324	244.766	69.5254	51.0016	49.1297	84.3856	62.1786	54.8306	hypothetical protein
AAEL011518-RA	1206.43	3007.84	5393.06	3803.51	1086.62	386.393	470.237	874.909	698.967	431.603	aspartyl-tRNA synthetase
AAEL011519-RA	297.913	1280.54	1407.9	1826.63	1553.45	1415.46	928.387	274.499	630.98	231.78	sucrose transport protein
AAEL011527-RA	12409.8	23892.1	21639.7	14088.1	6775.8	4674.14	3847.61	8395.74	6261.78	7150.66	eukaryotic translation initiation factor
AAEL011531-RA	308.334	744.565	1125.95	1168.93	460.055	274.603	322.798	239.695	225.39	276.439	conserved hypothetical protein
AAEL011536-RA	751.874	1911.96	2493.9	1701.89	493.981	234.503	318.564	400.562	416.516	426.184	phosphoglucomutase
AAEL011580-RA	949.086	1735.12	2476.55	3620.24	2578.87	2054.07	1665.12	999.624	1683.56	1206.83	conserved hypothetical protein
AAEL011584-RA	3865.38	14095.2	12267.9	2377.93	537.106	419.009	1101.99	3413.33	1619.64	1145.2	chaperonin-60kD, ch60_E2
AAEL011650-RA	2172.66	3531.42	4652.87	4213.48	3296.01	3025.67	2407.36	2178.31	2003.53	1595.8	coatomer, gamma-subunit, putative
AAEL011655-RA	803.449	925.733	848.012	738.251	254.1	191.127	526.045	589.006	581.832	584.715	aspartyl-tRNA synthetase
AAEL011666-RA	603.628	1050	1448.43	1222.47	352.96	269.968	600.25	433.995	463.517	360.935	mitochondrial ribosomal protein, L41, putative
AAEL011684-RA	970.94	1280.36	1344.19	1165.87	859.628	387.5	674.214	754.282	779.473	643.513	conserved hypothetical protein
AAEL011693-RA	404.037	830.125	491.616	311.877	83.5326	74.7344	163.194	227.754	224.188	244.221	mitotic control protein dis3
AAEL011698-RA	804.04	1343.45	1537.41	1056.96	640.857	612.077	535.699	570.022	560.174	442.258	mrna (guanine-7-)methyltransferase
AAEL011704-RA	55.5464	226.123	65.2906	276.57	130.015	48.9293	51.9849	67.2152	54.1802	55.7906	heat shock protein_E1
AAEL011729-RA	385.823	3376.22	1670.78	978.446	466.306	425.869	419.179	234.389	553.768	174.678	conserved hypothetical protein
AAEL011754-RA	2305.46	5459.77	12393.1	8253.44	4253.6	2310.99	2162.44	2263.45	1920.44	2278.77	conserved hypothetical protein	AAEL011754-RB conserved hypothetical protein
AAEL011755-RA	13024.5	15842.8	35426	37232.8	16489.5	9076.17	7516.38	10417.7	6761.68	12311.6	integral membrane protein, Tmp21-I (p23), putative	AAEL011755-RB integral membrane protein, Tmp21-I (p23), putative
AAEL011756-RA	32119.1	117249	185886	182975	83744.4	55283.4	16808.3	23890.7	24763.2	21361.5	aldehyde dehydrogenase
AAEL011773-RA	6683.01	39579.7	82214.3	75746.4	21248.9	7225.56	5931.3	11229.8	5220.14	3403.56	calreticulin
AAEL011810-RA	808.66	3380.55	1512.66	969.365	1274.66	1003.92	589.893	215.203	396.699	190.097	conserved hypothetical protein
AAEL011813-RA	1258.19	3764.67	5262.95	2862	2096.86	1535.14	909.33	1002.66	788.291	836.799	conserved hypothetical protein
AAEL011814-RA	1349.75	2982.15	2630.83	1453.3	633.823	579.186	989.097	1348.58	1212.35	1025.35	Mitochondrial ribosomal protein, S30, putative_E2
AAEL011819-RA	735.309	1298.19	1398.14	1316.01	802.892	615.942	724.015	510.104	540.664	348.795	conserved hypothetical protein
AAEL011880-RA	1053.95	1039.72	1318.23	1842.56	924.9	952.914	975.633	834.817	671.215	936.111	hypothetical protein
AAEL011881-RA	2097.28	2982.97	3805.37	2735.91	1839.16	1452.47	1884.87	2053.03	1220.57	906.831	conserved hypothetical protein
AAEL011901-RA	101.142	285.202	149.42	165.828	93.7818	95.1498	165.801	101.955	85.9396	75.04	1-acyl-sn-glycerol-3-phosphate acyltransferase
AAEL011912-RA	1576.84	3982.59	15386.6	21553.3	11700.6	3551.58	2016.33	1323.75	1424.02	1198.11	mannose-1-phosphate guanyltransferase
AAEL011925-RA	81.0782	255.769	161.426	102.523	61.997	57.1119	132.668	73.7442	79.5092	77.2945	Mitochondrial ribosomal protein, S31, putative_E1
AAEL011928-RA	171.23	223.902	342.581	831.277	411.139	99.8131	224.14	184.831	165.999	141.32	conserved hypothetical protein
AAEL011958-RA	1084.03	2145.27	1248.72	551.303	177.667	185.531	522.743	550.29	513.17	445.435	conserved hypothetical protein_E2	DS|0620|VB|AAEL011958|conserved hypothetical protein|E2; DS|0480|VB|AAEL011958|conserved hypothetical protein|E2; DS|0620|VB|AAEL011958|conserved hypothetical protein|E2
AAEL011968-RA	1723.34	2138.86	2361.44	3042.48	1492.01	793.382	1005.23	1138.09	1502.57	1116.12	conserved hypothetical protein
AAEL011974-RA	4900.58	5371.26	5772.96	4570.83	2428.09	1973.92	3085.54	4419.99	3600.03	4374.58	conserved hypothetical protein
AAEL011982-RA	182.449	226.903	285.876	454.076	195.885	130.099	211.074	156.589	157.701	112.164	cortactin_E1
AAEL011989-RA	1713.51	7481.28	25490.7	24434.8	14045.9	5273.93	1220.01	1577.46	1808.46	1255.98	signal peptide peptidase	AAEL011989-RB signal peptide peptidase
AAEL011998-RA	100.089	114.276	186.399	444.181	164.56	167.39	62.0866	91.8534	230.9	164.923	hypothetical protein
AAEL012002-RA	180.951	149.678	185.505	219.939	111.112	61.2756	115.302	194.101	160.648	173.152	beta-1,4-galactosyltransferase
AAEL012016-RA	273.655	583.922	1101.33	1578.68	939.825	342.537	206.944	285.028	268.943	194.919	endomembrane protein emp70	AAEL012833-RA endomembrane protein emp70
AAEL012025-RA	211.182	614.801	598.677	418.168	124.254	86.5982	278.823	149.531	197.354	163.902	Mitochondrial ribosomal protein, L45, putative_E1
AAEL012034-RA	672.63	1941.55	4704.6	6028.88	4219.88	1528.88	829.295	593.351	610.937	511.728	alpha-1,3-mannosyltransferase
AAEL012038-RA	450.135	504.141	366.107	391.313	159.106	147.174	285.04	276.421	251.741	286.612	hypothetical protein
AAEL012054-RA	10865.4	20054.1	34121.8	64894.6	32945.2	8661.87	2313.28	7748.54	7420.06	4356.61	Quiescin-sulfhydryl oxidase4, putative
AAEL012055-RB	386.131	1042.91	3241.46	3199.59	1451.55	757.948	343.894	350	374.468	375.926	dfg10 protein	AAEL012055-RA dfg10 protein
AAEL012092-RA	323.648	1291.19	1333.81	1137.21	740.923	445.71	241.577	273.137	402.12	164.682	leucine-rich repeat
AAEL012104-RA	58.3704	125.272	52.7799	43.7701	42.4147	49.0624	83.3724	57.2357	67.7088	49.5309	conserved hypothetical protein
AAEL012105-RA	599.966	1768.96	2113.66	2480.58	1659.61	839.04	696.404	512.816	551.67	628.812	conserved hypothetical protein
AAEL012111-RA	161.642	376.085	265.709	308.875	93.5592	78.526	86.2909	239.706	173.139	201.222	conserved hypothetical protein	AAEL014071-RA conserved hypothetical protein
AAEL012116-RA	5070.38	7387.67	8610.2	12603.5	9199.44	6096.17	5682.62	5266.59	5927.09	5137.14	glutaredoxin, putative
AAEL012123-RA	4559.68	5415.89	10416.9	9446.96	3365.57	1497.12	1135.79	4239.47	2481.5	5542.53	conserved hypothetical protein	AAEL014068-RA conserved hypothetical protein
AAEL012138-RB	87.3088	146.204	258.841	713.397	370.142	288.493	71.1638	75.0867	82.5221	74.5374	24-dehydrocholesterol reductase	AAEL012138-RA 24-dehydrocholesterol reductase
AAEL012167-RA	3467.94	3427.91	3797	2202.69	1483.86	1516.79	3022.96	3024.15	2585.17	2674.22	elongation factor tu (ef-tu)
AAEL012219-RA	928.913	1203.24	2092.95	1967.21	1225.32	796.399	753.703	861.853	1033.72	805.581	ubiquitin specific protease
AAEL012238-RA	1335.25	2038.41	2985.21	5813.47	3595.53	1877.95	1433.57	1588.47	1813.23	2184.91	glutaredoxin, putative
AAEL012240-RA	5983.73	20694.5	46262.7	32503.5	11589.3	5717.55	4555.19	5624.71	4453.87	5316.03	protein transport protein sec13
AAEL012256-RA	492.035	1006.17	1354.14	1821.43	1646.8	1116.06	702.986	664.8	555.308	422.956	lung seven transmembrane receptor
AAEL012257-RA	161.297	427.9	564.898	664.52	522.095	265.082	217.973	205.505	144.121	133.812	conserved hypothetical protein
AAEL012274-RA	115.647	489.919	754.444	788.629	660.122	284.807	352.824	140.006	117.221	87.8263	AA_transpt_E2
AAEL012278-RA	2746.7	6309.59	6905.33	3757.77	2625.38	2267.6	3114	2813.69	2135.68	2155.52	metalloprotease
AAEL012282-RC	1520.51	3723.02	2910.66	1690.09	903.692	722.264	1520.39	1707.18	1375.61	1172.79	prohibitin
AAEL012286-RA	165.757	182.913	199.486	208.328	56.2179	107.626	120.356	159.134	132.522	137.319	apoptosisinhibitor_E1+E2+E3
AAEL012299-RA	944.594	2250.16	2103.53	2355.46	1597.01	1183.57	1229.82	661.063	1031.62	468.927	protein phosphatase 2c
AAEL012306-RA	1192.79	1231.49	1357.84	952.177	407.356	607.003	1146.56	1064.96	774.354	899.591	ubiquitin-activating enzyme E1c
AAEL012312-RA	3764.95	5920.54	7532.35	4965.09	3223.94	2160.72	1590.57	3543.7	2387.75	2181.59	proliferation-associated 2g4 (pa2g4/ebp1)
AAEL012316-RA	1818.86	2622.59	3816.03	3672.56	2410.68	1971.39	2697.49	1746.26	2101.26	1319.59	arsenical pump-driving atpase
AAEL012318-RA	1209.76	1868.58	3140.33	1979	1224.82	930.769	292.466	194.449	273.313	264.202	2-amino-3-ketobutyrate coenzyme a ligase
AAEL012320-RA	624.56	1369.31	1872.88	2754.74	1889.74	1432.94	1493.16	581.344	788.933	478.699	conserved hypothetical protein	AAEL013478-RA conserved hypothetical protein
AAEL012329-RA	468.369	890.37	769.934	584.05	230.627	164.792	455.888	281.546	240.132	286.73	cysteinyl-tRNA synthetase
AAEL012350-RA	64.8305	86.5377	95.8472	235.841	79.2916	63.5985	90.4388	59.3949	76.859	64.8392	lipase 1 precursor
AAEL012359-RA	89137.2	95352.9	86397.6	96364.6	37152.3	10961.1	5620.77	55447.9	34414.9	53800.7	nucleoside-diphosphate kinase NBR-A, putative
AAEL012394-RA	1369.99	2907.49	6542.55	11284	6431.93	2890.02	1287.96	1073.14	1228.33	627.806	glucosidase ii beta subunit
AAEL012395-RA	185.033	439.402	384.035	702.642	627.154	586.738	482.589	139.123	205.125	83.9397	atp-binding cassette transporter
AAEL012401-RA	84.0892	62.5644	156.347	371.384	151.892	90.1309	103.407	94.2273	93.2643	78.6392	short-chain dehydrogenase
AAEL012408-RA	1507.17	2306.71	2475.43	1529.9	618.98	630.539	1339.88	1097.88	918.492	1142.07	Mitochondrial ribosomal protein, L53, putative_E2
AAEL012413-RA	692.238	1110.44	903.101	667.118	417.707	361.032	441.96	482.704	329.504	400.682	n-acetyltransferase mak3
AAEL012426-RA	999.466	2022.82	1676.42	947.187	452.61	399.509	824.154	874.758	715.523	659.5	cytochrome c oxidase assembly protein cox15
AAEL012479-RA	558.996	839.984	1133.42	2090.93	1268.29	990.761	748.173	345.108	525.003	423.812	mannosyl-oligosaccharide glucosidase
AAEL012485-RA	1408.76	3392.86	5153.18	6424.04	1625.04	1042.26	1011.88	1097.08	1813.31	831.357	hypothetical protein
AAEL012511-RA	2266.46	10561.5	26966.3	41146.7	14213.9	5040.32	1998.06	2098.39	2218.5	1822.98	conserved hypothetical protein
AAEL012514-RA	1088.95	1606.69	2068.29	2366.06	1731.95	1487.09	1185.21	910.81	878.878	954.288	translation initiation factor 2b, delta subunit
AAEL012538-RA	175.604	850.051	1399.32	2737.52	1374.63	1021.44	615.247	155.986	236.56	110.047	conserved hypothetical protein
AAEL012552-RA	21495.4	19747.4	21744.4	24378.5	16993.7	13739.3	14801.4	15933.6	16285.4	11442	nadh-ubiquinone oxidoreductase
AAEL012570-RA	160.781	1070.18	1257.04	2207.24	934.129	545.18	282.61	170.474	531.042	200.794	hypothetical protein
AAEL012578-RA	24455.7	41884.2	47483	27936.1	26642.2	22003.3	12252.1	19925.4	41086.8	37455.4	phosphoserine aminotransferase_E2
AAEL012684-RA	6247.56	12961.5	29621.1	33429.2	23339.3	9534.84	2471.85	2958.39	4271.74	2543.53	conserved hypothetical protein
AAEL012690-RA	467.866	904.001	952.007	801.537	539.286	452.309	775.538	424.889	504.084	359.679	3-5 exonuclease
AAEL012721-RA	489.475	932.265	1255.98	990.635	162.427	72.9281	626.69	331.683	279.023	184.179	conserved hypothetical protein
AAEL012731-RA	9374.74	13634	16570.4	7955.84	2864.6	1570.15	1151.01	5633.25	5780.98	5384.07	adenylate kinase 1,
AAEL012733-RA	135101	152857	121523	124361	115901	96487.2	69341.6	99489.9	117783	108386	60S ribosomal protein L19
AAEL012762-RA	258.197	786.212	1294.66	362.032	269.891	208.631	138.784	124.939	150.281	150.379	cytochrome P450
AAEL012816-RA	797.439	1144.78	1410.8	1563.76	482.863	360.066	302.625	293.018	404.665	321.26	conserved hypothetical protein
AAEL012825-RA	42661.2	208158	260205	195100	69660	39157.7	14059	68249.4	100508	106963	bifunctional purine biosynthesis protein
AAEL012827-RA	9314.17	67596.6	76982.6	36769.9	9398.03	5984.97	10219.7	17620.1	10652.6	7023.28	endoplasmin
AAEL012841-RA	2502.43	8304.3	13977	8943.78	5834.52	3317.24	1796.96	2630.93	1945.18	2432.59	conserved hypothetical protein
AAEL012875-RA	918.665	2865.98	5437.21	4594.63	2682.53	1346.55	873.862	682.414	814.084	733.594	snare protein sec22
AAEL012880-RA	157.583	342.341	432.22	379.449	210.618	156.909	118.899	157.733	132.187	118.468	hypothetical protein
AAEL012885-RA	304.606	563.709	703.854	768.554	506.536	275.722	153.871	262.834	219.203	216.431	conserved hypothetical protein
AAEL012912-RA	634.25	1017.59	1577.94	1978.65	1226.85	838.572	841.006	735.866	493.444	988.481	conserved hypothetical protein
AAEL012918-RA	1425.82	2094.72	2505.8	1516.12	975.109	996.962	396.928	1141.79	663.911	990.186	puromycin-sensitive aminopeptidase
AAEL012924-RA	4269.58	6582.47	7305.36	3877.39	2237.82	1957.74	2178.21	3635.59	2613.59	3844.3	Mitochondrial ribosomal protein, S24, putative_E2
AAEL012933-RA	4188.72	11392.9	14650.6	12455.2	3031.57	1574.12	1847.35	3196.3	5487.22	2459.2	hypothetical protein
AAEL012974-RA	9824.71	21372.6	29358	22326.1	14816.8	12738.7	6075.76	3917.72	3966.81	3665.06	glycine cleavage system h protein
AAEL012984-RA	714.077	2634.56	4485.84	2946.2	1821.56	905.006	886.831	698.739	774.576	742.277	conserved hypothetical protein
AAEL013005-RA	3815.47	13329.8	25599.1	24660.1	8890.56	3679.01	5086.68	7628	4095.49	2874.89	conserved hypothetical protein
AAEL013017-RA	372.311	625.309	979.151	1055.63	646.442	439.018	528.456	407.441	437.555	300.838	mmr1/hsr1 gtp binding protein
AAEL013056-RA	119.128	179.609	255.758	492.2	323.975	95.4151	204.524	119.991	110.544	101.316	conserved hypothetical protein
AAEL013061-RA	3439	3764.32	4023.78	4075.76	1171.87	649.375	1380.7	1898.31	1683.35	3124.56	SM protein G, putative
AAEL013062-RA	417.234	1335.7	2300.47	3444.18	1340.81	507.358	349.834	283.972	252.906	173.65	hypothetical protein
AAEL013067-RA	680.417	1936.59	3034.43	2121	1218.98	682.403	606.64	541.623	590.115	435.316	conserved hypothetical protein
AAEL013071-RA	4874.9	16819.9	38902	57328.3	32065.6	9301.45	2853.93	4100.93	3600.33	2970.19	ribophorin
AAEL013076-RA	3768.11	9549.14	18087.6	12653.7	6603.91	3781.46	2867.35	2444.52	2154.56	1607.73	signal recognition particle 54 kda protein
AAEL013078-RA	5528.33	16788.7	55308.9	61003.5	26187.8	5886.29	3531.16	4517.35	3388.47	3198.01	glycosyltransferase
AAEL013109-RA	72.536	54.4999	79.9471	172.145	130.525	49.0621	52.3562	92.9177	115.042	196.994	glutamate_transporter_E2
AAEL013114-RA	1339.08	4461.86	7829.21	5925.7	2443.38	1408.5	1116.05	867.887	774.878	870.161	DNA-J, putative
AAEL013116-RA	199.348	377.016	325.915	170.096	59.228	68.0301	126.36	137.72	165.544	107.046	Mitochondrial 39S ribosomal protein L3_E2
AAEL013121-RB	3617.2	11359.9	22329.2	17215.6	7560.37	3982.57	2986.21	3666.76	3237.84	3394.89	zeta-coat protein	AAEL013121-RA zeta-coat protein
AAEL013121-RC	2956	9329.83	18769.8	15016.3	6679.16	3364.74	2487.93	2925.64	2590.89	2705.94	zeta-coat protein
AAEL013130-RA	7205.58	14185	19245	16288.6	4289.77	2226.56	2819.28	4501.95	7188.77	3198.65	hypothetical protein
AAEL013147-RA	268.067	732.546	1040.7	712.612	322.574	158.311	316.448	275.188	185.858	250.168	hypothetical protein
AAEL013166-RA	86.646	128.242	160.266	278.165	79.9805	61.0384	71.9371	91.1735	94.1385	74.1665	aminotransferase
AAEL013188-RA	3569.4	5016.91	7100.04	6041.47	2855.16	1917.35	3581.29	3346.66	3080.18	3061.1	cle7
AAEL013189-RA	1602.57	3151.11	3857.08	2729.82	2022.58	1624.61	1696.24	1743.5	2043.42	1882.05	conserved hypothetical protein
AAEL013199-RA	1181.29	1843.17	2728.94	2617.98	2379.8	1866.45	1368.55	956.36	1598.46	961.524	DNA-J, putative
AAEL013206-RA	1308.2	4439.98	8003.68	4810.93	2986.11	1561.91	1342.36	1309.08	1397.98	1405.11	fgf receptor activating protein
AAEL013226-RA	1181.21	2279.83	3710.82	4334.17	3815.4	2805.73	1806.42	1619.12	2009.79	1597.55	conserved hypothetical protein
AAEL013230-RA	1814.83	5691.93	11827.4	8615.52	4381.42	2324.94	1987.37	1808.43	1618.19	1197.6	coatomer delta subunit
AAEL013233-RA	3152.16	4856.85	5070.78	3999.24	3314.6	2869.74	2738.68	1723.68	1935.71	1123.16	PIWI
AAEL013236-RA	15660.5	11604	16188.3	19130.1	9955.38	9000.67	9110.46	11532.1	8526.18	13585.6	proteasome subunit beta type 5,8
AAEL013240-RA	930.13	2174.69	5037.14	3886.58	2111.82	1543.99	2291.33	1206.77	1027.45	1480	conserved hypothetical protein
AAEL013243-RA	924.884	1820.51	1792.41	1226.24	502.175	526.985	664.804	469.731	749.111	607.826	conserved hypothetical protein
AAEL013279-RA	32988.3	37450.6	80149.1	115322	85295.8	45832.5	24520.8	41962.6	25774.9	34648.6	peptidyl-prolyl cis-trans isomerase (cyclophilin)
AAEL013310-RA	364.399	474.543	599.497	570.559	375.827	103.398	351.856	339.83	268.687	456.85	conserved hypothetical protein
AAEL013314-RA	1163.96	2702.91	2427.55	1140.68	813.141	451.194	679.213	603.154	600.713	760.79	calicylin binding protein
AAEL013320-RA	8430.06	42936.4	83114.3	72342.5	34881.2	11400.2	1878.17	4408.83	3054.57	2487.68	translocon-associated protein, delta subunit
AAEL013352-RA	67.2044	233.034	147.82	137.191	83.3021	73.0652	53.3801	71.1417	61.0675	62.5223	lethal(2)essential for life protein, l2efl
AAEL013364-RA	53.2475	104.289	56.4898	49.3991	34.4485	38.0848	38.0048	42.9858	41.7383	38.5999	hypothetical protein
AAEL013389-RA	3913.34	4532.97	4422.43	4292.83	2696.76	2028.04	3177.85	3033.05	2986.96	3341.41	coproporphyrinogen iii oxidase
AAEL013393-RA	3276.72	2024.5	7408.72	7440.14	2324.49	2039.3	2117.19	2809.37	2323.66	3556.38	conserved hypothetical protein
AAEL013406-RA	52.5708	435.66	1355.24	2426.13	883.446	255.528	58.4232	69.9425	49.3593	66.6046	venom allergen
AAEL013413-RA	234.58	446.913	441.935	812.014	312.101	229.927	530.232	235.489	281.994	144.318	hypothetical protein
AAEL013436-RA	80.583	148.164	131.695	227.21	113.289	98.7463	101.908	70.5872	73.5978	65.0781	conserved hypothetical protein
AAEL013440-RA	778.9	936.089	1522.69	2039.77	1606.26	1246.7	1238.36	716.584	653.99	725.012	conserved hypothetical protein
AAEL013469-RA	466.636	765.125	631.574	596.895	210.677	195.587	513.392	309.404	281.897	299.745	valyl-tRNA synthetase
AAEL013472-RA	252.583	236.392	319.243	511.188	270.233	303.315	358.99	213.091	194.283	208.982	conserved hypothetical protein
AAEL013491-RA	1981.81	4335.47	2823.64	2365.12	2382.79	2639.36	2456.93	2259.72	1484.39	974.905	short-chain dehydrogenase
AAEL013494-RA	2777.61	5414.56	11649.5	17567.4	10365.4	4794.22	2212.44	2205.14	2589.26	2497.27	conserved hypothetical protein
AAEL013495-RA	363.808	720.154	1019.58	1626.17	370.951	231.592	341.132	286.055	277.33	396.79	conserved hypothetical protein
AAEL013521-RA	1626.12	3940.37	5075.11	3085.88	1304.49	705.191	515.022	1062.3	1073.81	1218.61	tryptophanyl-tRNA synthetase
AAEL013536-RA	278.04	679.14	826.957	1126.21	289.992	269.994	59.2662	138.123	122.309	153.89	Ubiquitin (ribosomal protein L40)_E1
AAEL013537-RB	2928.47	5172.51	4597.98	3845.54	2236.21	1735.56	2159.5	2447.9	3308.71	2442.54	hypothetical protein	AAEL013537-RA hypothetical protein
AAEL013541-RA	535.982	1308.97	1901.96	1852.63	1850.87	1341.86	795.318	490.665	470.719	389.786	syntaxin
AAEL013545-RA	513.698	990.501	547.031	524.51	335.419	348.168	306.57	171.996	532.865	337.608	hypothetical protein
AAEL013560-RA	2156.6	3985.63	3528.56	2389.2	902.241	798.585	1209.27	1471	1616.97	1691.36	Mitochondrial ribosomal protein, L50, putative_E2
AAEL013561-RA	236.611	376.262	385.983	522.511	457.862	340.183	206.699	199.953	206.192	180.458	conserved hypothetical protein
AAEL013577-RA	52.223	110.723	107.222	204.054	189.054	143.326	78.4082	48.4667	68.2955	51.7152	conserved hypothetical protein	AAEL013577-RC conserved hypothetical protein; AAEL013577-RB conserved hypothetical protein;;
AAEL013608-RA	516.161	600.637	933.52	1027.11	453.504	381.33	593.507	502.688	594.778	542.894	sugar_transporter_E2
AAEL013619-RA	69.0176	106.884	215.221	409.782	276.597	76.5086	69.6314	57.2902	59.4886	67.1964	dolichyl-diphosphooligosaccharide protein glycosyltransferase
AAEL013631-RA	398.399	642.392	1038.08	1116.9	802.967	553.756	561.481	427.396	475.256	354.394	mmr1/hsr1 gtp binding protein
AAEL013642-RA	2808.16	12498.4	17329.7	21138	15407.9	9953.98	2551.74	3867.03	5203.58	4450.03	acyl-coa dehydrogenase
AAEL013643-RA	799.421	1106.07	963.408	598.849	442.24	407.039	711.803	595.527	538.104	547.658	mitochondrial transcription factor A, putative
AAEL013644-RA	663.823	1540.24	843.853	417.827	82.7236	109.905	295.346	391.488	331.688	367.894	ubiquitously transcribed sex (x/y) chromosome tetratricopeptide repeat protein
AAEL013652-RA	1559.08	1997.64	2057.69	1555.46	604.647	551.426	1123	1168.92	1086.74	775.572	oxidoreductase
AAEL013676-RA	25065.7	26526.8	36266.3	22697.1	11900.3	12054.5	16468.3	18855.7	13717.2	19588.2	26S protease regulatory subunit
AAEL013679-RA	2299.97	3952.44	3257.24	1453.97	838.142	762.467	823.096	1426.94	1335.63	1291.36	coilin-interacting nulcear ATPase protein, putative
AAEL013688-RA	812.215	2243.52	1483.95	667.389	463.214	672.3	356.247	444.081	356.697	540.227	conserved hypothetical protein
AAEL013724-RA	182.177	439.968	668.721	711.452	302.448	127.331	135.528	142.99	152.48	131.596	conserved hypothetical protein
AAEL013726-RA	78.2774	78.9362	150.693	79.1403	65.1597	51.8679	65.3237	83.5728	65.4939	77.9948	epsin 4/enthoprotin
AAEL013731-RA	145.647	264.803	231.79	247.258	89.8189	89.7465	124.956	117.927	101.197	91.8449	hypothetical protein
AAEL013749-RA	1475.49	1988.6	2729.07	2356.24	1672.97	1606.78	1724.37	1569.61	1233.99	1298.26	conserved hypothetical protein
AAEL013757-RA	204.568	376.839	767.626	2628.03	2784.12	1775.98	473.584	124.928	185.149	122.433	hexamerin 2 beta
AAEL013759-RA	49.226	79.239	276.215	553.192	459.359	92.8558	72.1565	45.9477	43.8648	41.6374	hexamerin 2 beta
AAEL013815-RA	340.621	569.337	723.767	1150.54	477.981	366.634	724.435	388.589	417.71	461.808	conserved hypothetical protein
AAEL013818-RA	1125.53	1974.88	2294.86	1823.55	896.921	592.073	940.318	892.854	813.372	958.326	spliceosome associated protein
AAEL013828-RA	1697.09	2478.6	2392.93	1691.77	657.014	653.827	1472.77	1285.26	1027.26	1516.28	translation initiation factor eif-2b
AAEL013840-RA	392.239	1606.33	1409.53	989.866	756.145	1004.98	834.155	537.245	979.435	907.278	conserved hypothetical protein
AAEL013844-RA	1984.26	2243.76	2173.75	2326.5	970.932	885.968	843.64	1346.79	1362.85	1809.26	diazepam binding inhibitor, putative
AAEL013845-RA	945.471	1676.63	2499.15	1926.95	1761.2	1033.66	666.817	1005.14	710.992	820.681	endoplasmic reticulum resident protein (ERp44), putative
AAEL013857-RA	2735.33	14280.5	31161.8	64919.9	50911.2	44552.4	10027.9	1297.52	1936.66	873.136	conserved hypothetical protein	AAEL013857-RB conserved hypothetical protein
AAEL013864-RA	197.09	501.778	312.55	377.095	336.606	339.825	206.214	131.996	93.6577	209.97	conserved hypothetical protein
AAEL013904-RA	3376.84	21639.8	26233	21974.6	7375.92	3090.62	2216.09	6932.12	13179.5	7590.83	3-hydroxyisobutyrate dehydrogenase
AAEL013943-RA	172.845	381.888	409.933	403.42	185.034	116.514	168.084	168.041	174.348	156.457	mediator complex, 100kD-subunit, putative
AAEL013964-RA	2901.06	5598.26	7258.57	6768.5	2230.84	1432.69	2682.58	3033.81	2942.21	2820.91	Ribosomal protein L20, putative_E2
AAEL013967-RA	8366.41	22370.8	30413	23099.9	6347.87	2671.74	3035.27	7166.79	8419.57	4899.41	Methylmalonyl-CoA carboxyltransferase 12S subunit, putative
AAEL013973-RA	314.364	387.155	355.36	606.753	208.216	121.88	265.028	270.349	422.818	254.751	hypothetical protein
AAEL013979-RC	553.794	1004.66	1147.8	1112.75	682.917	600.833	908.419	491.873	614.808	579.717	conserved hypothetical protein	AAEL013979-RB conserved hypothetical protein; AAEL013979-RD conserved hypothetical protein;;
AAEL013989-RA	21340.7	91336.3	161344	140560	63981.4	17282.2	3317.4	10249.1	8077.44	10045.8	protein translocation complex beta subunit, putative
AAEL013992-RB	3052.01	5929.91	9416.71	10697.6	5326.21	2901.06	1973.83	1714.43	1870.18	2328.51	conserved hypothetical protein	AAEL013992-RA conserved hypothetical protein
AAEL013998-RA	468.714	801.751	1137.04	1121.19	251.833	170.032	433.243	264.836	308.766	371.633	conserved hypothetical protein
AAEL014024-RA	1294.73	1634.93	1708	2574.74	1458.18	803.424	875.209	914.519	981.858	1024.69	conserved hypothetical protein
AAEL014029-RA	706.749	963.164	1622.48	2674.19	2174.15	1161.11	897.471	635.838	645.171	754.691	t1/st2 receptor binding protein
AAEL014050-RA	1354.19	2043.46	3328.38	3208.84	1740.96	1415.53	2191.37	1404.83	942.234	1133.98	testosterone-regulated protein rp2
AAEL014052-RB	459.822	1295.61	1772.64	2530.3	572.248	268.539	462.176	287.855	364.218	370.307	endoplasmic reticulum protein erp29	AAEL014052-RA endoplasmic reticulum protein erp29; AAEL014052-RC endoplasmic reticulum protein erp29;;
AAEL014064-RA	1650.52	2476.46	2900.56	5058.06	3504.8	2167.09	2347.23	1447.35	2295.67	1668.16	glutaredoxin, putative
AAEL014080-RA	2573.28	3484.67	3540.82	5160.96	2857.35	1504.7	947.134	1529.31	1529.75	1296.49	aldehyde dehydrogenase
AAEL014094-RA	479.759	1472.37	2321.29	2367.95	1595.44	1056.79	695.821	547.191	481.607	383.567	solute carrier family 35 member C2, putative	AAEL013468-RA solute carrier family 35 member C2, putative
AAEL014099-RA	1072.07	1258.72	1139.72	832.305	515.581	723.541	1052.73	1121.15	588.404	1028.56	valyl-tRNA synthetase
AAEL014107-RA	3921.96	4581.27	2987.69	2479.01	1703.49	1742.06	3998.48	2207.09	3067.06	1849.97	conserved hypothetical protein
AAEL014110-RA	2066.85	2763.63	5160.46	7685.27	5123.98	2891.76	1183.71	2414.31	3224.84	3450.39	sulfite reductase	AAEL014252-RA sulfite reductase
AAEL014157-RA	163.987	387.92	379.246	232.221	75.9903	131.578	171.259	124.089	145.498	141.232	conserved hypothetical protein
AAEL014177-RA	1877.28	3992.28	9160.21	5774.63	3657.61	2538.17	1520.13	1640.41	1376.51	1639.96	adp-ribosylation factor, arf
AAEL014183-RB	586.253	913.201	1098.76	1490.28	848.016	588.69	616.572	693.396	682.555	614.774	conserved hypothetical protein	AAEL014183-RA conserved hypothetical protein
AAEL014186-RA	5404.55	26462.1	90543.3	67749	20870.1	5526.11	3676.66	7028.35	4015.48	5303.12	dolichyl-phosphate beta-D-mannosyltransferase, putative	AAEL003084-RA dolichyl-phosphate beta-D-mannosyltransferase, putative
AAEL014201-RA	1530.48	1611.89	2312	2127.68	1298.49	1148.59	1459.88	1187.04	1441.22	849.1	chaperone protein, putative
AAEL014220-RA	540.893	967.184	1029.24	789.501	411.962	373.778	214.895	582.576	513.523	592.7	conserved hypothetical protein
AAEL014253-RA	1175.69	1712.92	1184.88	971.938	676.167	566.034	1251.42	551.267	806.245	453.988	conserved hypothetical protein
AAEL014262-RA	807.12	1129.13	1423.22	1455.53	1085.8	912.789	1058.09	677.73	770.897	551.263	translation initiation factor eif-2b alpha subunit
AAEL014271-RA	2314.59	6252.7	14227	17355.2	9690.36	3810.09	1823.53	1815.62	1643.72	1410.74	conserved hypothetical protein
AAEL014279-RA	757.838	2935.26	8462.52	10867.9	4363.37	1385.88	709	608.444	543.822	446.459	glycosyltransferase
AAEL014281-RA	3019.49	4555.6	4280.96	3065.22	2513.97	1645.75	1942.76	2560.81	2485.81	2402.97	conserved hypothetical protein
AAEL014293-RA	55.1925	104.095	156.451	130.097	56.9701	44.5798	69.2708	54.1376	60.1517	51.0912	hypothetical protein
AAEL014304-RA	135.529	190.275	125.614	114.055	48.2834	44.308	59.3421	135.777	93.1117	93.1438	hypothetical protein
AAEL014331-RA	1012.99	2228.21	2059	2374.15	1590.03	1283.08	1287.06	683.771	1057.98	510.071	protein phosphatase 2c
AAEL014345-RA	2055.16	6091.27	9714.93	10473.8	5178.72	1975.19	1637.83	1918.56	1420.32	1225.6	conserved hypothetical protein
AAEL014365-RA	2816.16	6202.82	4191	5601.71	1547.71	1783.28	1189.21	4018.4	2014.37	4011.55	amine_transporter_E6
AAEL014365-RB	3525.92	7016.95	4687.31	6540.44	1981.9	2099.27	1431.57	4889.82	2509.28	5849.42	chromaffin granule amine transporter, putative
AAEL014379-RA	2160.45	3484.62	6126.02	8778.98	5616.93	2579.04	1997.51	1779.59	2544.69	2065.67	adrenodoxin
AAEL014381-RA	5398.04	30681	15151.9	6166.89	3885.38	3863.09	4158.59	2491.47	5798.87	2389.95	conserved hypothetical protein
AAEL014393-RA	3812.57	4630.62	9199	13367.5	9316.94	5117.69	3764.57	3716.81	2425.87	2367.67	lactoylglutathione lyase
AAEL014400-RA	568.276	1324.86	1093.21	695.668	220.746	209.434	288.937	417.7	302.408	501.384	zinc finger protein, putative
AAEL014401-RA	413.532	1333.94	1067.39	689.884	190.029	135.975	268.134	319.77	227.796	367.415	conserved hypothetical protein	AAEL008522-RA conserved hypothetical protein; AAEL008544-RA zinc finger protein, putative;;
AAEL014410-RA	486.928	843.822	949.915	1281.89	815.088	545.152	643.206	349.868	476.297	348.249	conserved hypothetical protein
AAEL014426-RA	9102.46	47989.9	63187.3	46337.6	21611.2	8962.73	4026.24	8132.1	11009.8	6594.89	glycine dehydrogenase	AAEL015628-RA glycine dehydrogenase
AAEL014444-RA	128.584	334.497	111.708	125.027	65.9165	54.1252	76.3733	130.118	99.8702	116.169	conserved hypothetical protein
AAEL014482-RA	161.881	648.125	689.053	1475.09	430.283	398.058	304.5	149.341	121.769	107.38	hypothetical protein
AAEL014494-RA	7158.26	13315.5	9996.6	5167.18	1750.17	1286.96	1232.08	3367.4	6268.53	2893.79	methionine-tRNA synthetase
AAEL014496-RA	55.7227	123.892	81.9018	272.957	53.0712	45.4894	47.6632	47.2934	53.0429	44.9959	hypothetical protein
AAEL014504-RA	4735.36	4891.33	7450.49	5218.22	2806.12	2365.14	2316.84	3436.35	2597.12	3548.94	dual-specificity protein phosphatase, putative
AAEL014523-RA	130.439	99.0092	87.1224	148.58	146.732	64.5877	71.6213	126.27	109.635	151.14	neuroendocrine_convertase_ORF
AAEL014526-RA	6794.4	17420.7	24869.5	15706.3	7299.73	4119.09	2843.96	3164.58	4056.76	2257.43	sideroflexin 1,2,3
AAEL014546-RA	1106.53	1334.42	2541.81	2734.37	1083.09	737.874	867.85	734.797	854.101	855.777	conserved hypothetical protein
AAEL014548-RA	8382.04	12984.9	32816	58144.7	25178.6	10192	4478.55	5680.11	4899.99	5066.54	peroxiredoxins, prx-1, prx-2, prx-3
AAEL014555-RA	2782.86	2716.99	3710.3	5951.92	2934.16	2507.19	2590.09	1969.84	1723.02	2011.75	Ump1p protein, putative
AAEL014629-RA	352.97	797.934	779.03	333.512	123.907	56.6534	185.008	179.065	418.887	191.324	hypothetical protein
AAEL014651-RA	1975.58	1992.31	3796.11	4152.72	1710.11	1112.68	1386.02	1167.92	1299.9	1275.08	nad dependent epimerase/dehydratase	AAEL008593-RA nad dependent epimerase/dehydratase
AAEL014668-RA	312.721	840.478	594.069	743.784	585.826	358.901	309.196	146.873	266.636	191.179	ankyrin 2,3/unc44
AAEL014702-RA	3143.89	5009.3	6939.38	6447.94	2306.92	887.627	891.99	1753.32	3950.62	1269.13	lysyl-tRNA synthetase
AAEL014707-RA	599.123	1607.92	2486.27	2791.92	1764.42	1204.55	1377.86	867.024	951.742	515.725	2-hydroxyphytanoyl-coa lyase
AAEL014709-RA	5679.26	12274.1	8581.69	4798.09	1828.15	1211.3	1170.22	2786.08	4961.36	2303.42	methionine-tRNA synthetase
AAEL014722-RA	1051.76	1778.17	1490.3	689.319	335.708	300.425	439.833	572.971	529.158	536.427	coilin-interacting nulcear ATPase protein, putative
AAEL014723-RA	25582.1	27549.6	35785	24468.4	12748	12147.6	18482.1	22043.9	16166.2	22795	26S protease regulatory subunit
AAEL014734-RA	639.206	11951.2	14120.4	12913.8	8207.12	5355.56	964.992	1627.93	2704.46	1037.59	saccharopine dehydrogenase
AAEL014742-RA	100.438	346.233	216.994	319.613	195.51	74.3016	62.5936	72.8402	94.789	71.2055	ankyrin 2,3/unc44
AAEL014750-RA	636.337	916.602	760.153	690.572	414.253	255.272	617.888	498.592	469.252	338.665	pyruvate dehydrogenase	DS|2094|VB|AAEL014750|Pyruvate dehydrogenase B|ORF; DS|2094|VB|AAEL014750|Pyruvate dehydrogenase B|ORF;;
AAEL014771-RA	504.505	1031.47	1234.4	1382.05	1175.49	825.585	692.557	498.594	650.834	400.311	conserved hypothetical protein
AAEL014794-RA	383.916	652.704	594.165	348.416	145.321	181.293	368.937	284.784	237.901	275.42	mitochondrial transcription factor A, putative	AAEL014794-RB mitochondrial transcription factor A, putative
AAEL014795-RA	539.807	942.601	821.815	734.87	405.091	361.161	538.853	557.267	506.247	541.011	hypothetical protein	AAEL013639-RA hypothetical protein
AAEL014797-RA	5046	21119.8	34597.3	37699.3	24488.6	15291.2	3955.87	7039.04	7670.13	7060.93	acyl-coa dehydrogenase
AAEL014818-RA	416.654	2592.09	4413.9	3320.57	904.524	381.927	754.551	500.366	584.384	351.421	sil1
AAEL014821-RA	1925.91	3573.23	7113.7	13147.7	7428.87	4712.21	3833.84	2087.86	2437.67	1953.5	hypothetical protein	AAEL014821-RB hypothetical protein
AAEL014823-RA	163.32	589.941	302.805	82.0953	60.1685	46.1384	76.5315	56.9705	59.7565	57.0409	conserved hypothetical protein
AAEL014826-RA	1254.83	3430.67	6474.95	8007.42	3244.9	1235.08	1117.6	1022.79	1058.75	833.503	conserved hypothetical protein
AAEL014831-RA	1167.49	2430.24	1890.03	1119.2	367.164	197.906	573.42	701.948	712.009	978.862	RNA polymerase II subunit Rpb10, putative
AAEL014836-RA	327.629	694.551	727.903	481.413	101.465	94.1199	337.559	250.574	261.032	231.023	28S ribosomal protein S15, mitochondrial precursor_E1
AAEL014865-RA	30818.5	21724.7	34745.7	21340.7	10518.8	9026.08	17794.4	20501.8	21089.9	19480.1	Pyruvate dehydrogenase A_ORF
AAEL014879-RA	49.1544	59.6457	76.1557	122.958	107.035	57.4086	47.9796	57.5276	51.0158	51.63	Pupal cuticle protein, putative	AAEL010134-RA Pupal cuticle protein, putative
AAEL014900-RA	519.282	724.407	798.614	754.429	244.073	131.191	280.208	523.544	484.115	510.103	ATAXIA_TELANGIECTASIA_MUTATED_ORF
AAEL014935-RA	18195.5	16768.9	23269.6	25064.8	16266.6	9075.09	10908	16420.8	14649.4	16184.3	cytochrome b5, putative	AAEL010017-RA cytochrome B5 (cytb5)
AAEL014961-RA	404.626	1534.85	1675.42	1301.62	437.34	430.083	392.08	611.467	610.6	750.887	gdp mannose-4,6-dehydratase
AAEL014996-RA	1711.58	2668	2879.65	1938.38	919.805	950.043	1371.87	1284.85	997.226	1373.04	Mitochondrial ribosomal protein, L53, putative_E2
AAEL014997-RA	7664.52	9479.21	10063.2	5594.54	3033.77	2712.78	4619.5	6111.37	3706.36	6342.82	conserved hypothetical protein	AAEL012411-RA conserved hypothetical protein
AAEL015001-RA	1299.97	6812.17	9039.69	8702.26	5107.5	2185.62	1301.29	1082.86	1145.15	826.907	coatomer	AAEL013098-RA coatomer
AAEL015004-RA	398.789	406.658	306.777	456.72	87.9657	113.292	256.077	318.248	250.401	318.15	hypothetical protein
AAEL015049-RA	219.474	903.93	1561.26	3539.5	1618.35	639.532	113.148	128.996	133.228	78.209	60S ribosomal protein L35_E1
AAEL015062-RA	1449.45	1910.72	1509.61	1155.72	708.391	630.272	740.661	762.348	888.265	922.125	conserved hypothetical protein
AAEL015084-RA	2632.13	5136.76	11423.2	8546.1	4772.02	2812.18	2478.07	2729	2513.38	2460.13	hypothetical protein
AAEL015100-RA	1227.37	3047.84	3395.24	4566.69	2741.82	1662.37	1022.66	1370.94	1473.51	1082.31	calnexin
AAEL015123-RA	578.468	1031.1	1673.69	1609.68	660.934	534.189	825.65	734.695	557.719	684.222	n6-adenosine-methyltransferase ime4
AAEL015202-RA	2871.22	4206.3	6088.26	7505.05	3985.12	2870.51	2417.51	2833.55	1982.5	2801.64	conserved hypothetical protein
AAEL015236-RA	3349.91	8603.79	18538.5	12657.5	5348.13	2834.31	1783.85	2768.91	2457.2	3231.46	signal recognition particle, 9kD-subunit, putative	AAEL012049-RA signal recognition particle, 9kD-subunit, putative
AAEL015258-RA	133.767	255.024	262.659	712.201	460.267	245.882	456.014	168.035	144.962	107.333	hypothetical protein
AAEL015274-RA	280.917	483.523	494.833	564.438	294.862	359.729	415.804	318.024	224.374	260.478	conserved hypothetical protein
AAEL015292-RA	341.521	858.882	1006.57	767.524	362.419	260.894	804.627	433.403	453.711	472.194	conserved hypothetical protein
AAEL015305-RA	300.774	823.547	610.83	414.749	222.641	272.516	282.958	135.778	120.669	138.368	sulfotransferase (sult)
AAEL015306-RA	801.32	1641.54	1160.96	671.177	600.413	746.853	679.647	287.736	284.225	342.351	hypothetical protein
AAEL015316-RA	84.1523	151.958	95.7327	137.605	56.3735	45.7443	84.9707	90.0228	84.9043	80.0515	hypothetical protein
AAEL015337-RA	4028.67	6767.88	12200	18629.7	9358.77	3567.01	2658.23	2825.04	3315.66	2100.69	neutral alpha-glucosidase ab precursor (glucosidase ii alpha subunit) (alpha glucosidase 2)
AAEL015363-RA	92.8832	173.635	188.176	362.875	343.599	267.501	229.575	82.0826	94.4561	77.6428	cuticle protein, putative
AAEL015393-RA	800.973	1266.6	936.378	809.794	459.855	389.16	616.702	597.677	549.101	726.931	conserved hypothetical protein
AAEL015410-RA	1809.25	5407.4	4091.6	7548.85	6992.8	6583.3	2009.96	1581.57	1973.56	917.847	amp deaminase
AAEL015438-RA	4237.96	7507.83	32731.3	35662.4	29111.9	15606.7	6865.08	5681.6	6163.05	4485.57	mannose-6-phosphate isomerase
AAEL015440-RA	1485.51	4724.97	2064.16	1507.35	615.745	353.659	373.032	1248.42	1552.91	752.586	hypothetical protein
AAEL015441-RA	1708.36	4052.26	1790.41	1443.2	506.883	278.8	285.248	1295.12	1365.98	667.846	spliceosomal protein sap
AAEL015446-RA	2153.01	3107.26	2613.72	1065.91	138.02	131.083	600.04	1003.56	1156.33	1526.47	conserved hypothetical protein
AAEL015453-RA	176.814	245.219	168.8	154.82	92.7903	112.519	69.0201	197.099	123.604	149.961	hypothetical protein
AAEL015489-RA	488.482	749.672	1021.79	754.955	245.797	210.214	308.139	333.071	379.29	359.567	conserved hypothetical protein
AAEL015541-RA	10590.6	12879.2	15032	9111.78	5364.59	3342.87	8557.89	6992.94	4762.96	4140.59	conserved hypothetical protein
AAEL015557-RA	532.132	790.406	961.495	1433.09	715.949	590.404	483.208	632.26	333.545	790.922	alpha methylacyl-coa racemase
AAEL015559-RA	201.833	312.467	211.245	79.6797	53.3126	106.071	251.721	83.3773	172.913	154.951	zinc carboxypeptidase
AAEL015571-RA	166.678	354.502	218.781	155.542	180.036	74.0121	176.527	130.446	144.734	211.665	conserved hypothetical protein
AAEL015572-RA	993.607	3589.35	6449.28	12992.5	4866.24	1576.22	454.337	639.184	505.328	303.802	ribophorin ii
AAEL015601-RA	2066.44	5732.87	7986.56	4340.43	1950.15	1013.76	635.871	1432.97	1391.88	1536.17	tryptophanyl-tRNA synthetase
AAEL015616-RA	923.673	1699.54	3709.82	7325.55	3713.29	1815.54	1249.96	861.422	823.478	692.218	conserved hypothetical protein
AAEL015633-RA	12901.5	20607.8	52709.8	41333.3	17953	11010	10315	9333.63	9051.12	10774.8	conserved hypothetical protein
AAEL015636-RA	601.905	1066.09	1276.65	1200.1	572.976	495.579	455.559	513.739	411.047	506.526	interleukin enhancer binding factor
AAEL015654-RA	1397.41	2328.43	6485.21	10717.9	5446.64	5282.05	1829.38	785.208	1395.43	636.157	cytochrome P450	AAEL003890-RA cytochrome P450
AAEL015671-RA	749.453	843.549	642.173	507.144	167.503	154.805	307.94	465.428	417.366	565.603	dna polymerase gamma
Average Expression	3453.67	6625.95	8868.79	8350.96	4522.73	2647.63	1994.27	2774.27	2969.95	2778.08
Normalized to 72 PE	1	1.91852	2.56793	2.418	1.30954	0.766615	0.577434	0.803282	0.859939	0.804386
LOG2	0	0.939997	1.36061	1.27381	0.389063	-0.383427	-0.792273	-0.316022	-0.217693	-0.31404
Early-Mid Genes (EMGs)
Target id	72 PE	3 PBM	6 PBM	12 PBM	18 PBM	24 PBM	36 PBM	48 PBM	60 PBM	72 PBM	Gene Name	Secondary hit
AAEL000006-RA	5697.75	49066.4	47367	56996.9	99579.9	80816.4	30853.5	36211.4	60340.1	69818.7	phosphoenolpyruvate carboxykinase
AAEL000038-RA	1620.87	1509.64	1211.64	2002.1	2976.21	3604.53	2717.88	1494.37	2399.85	2050.06	serine protease
AAEL000080-RA	3631.4	44093.1	44210.4	48100.2	118127	96469.2	72529.3	29964.8	49866.1	59717.2	phosphoenolpyruvate carboxykinase
AAEL000084-RA	599.928	924.279	1115.13	1043.76	1473.42	1444.52	1306.84	963.732	750.169	502.967	elongin b
AAEL000119-RA	865.793	1281.42	1668.97	2779.3	5617.33	6843.39	4293.26	1483.15	2027.21	1121.58	amp dependent coa ligase
AAEL000121-RA	88.8145	96.2953	220.031	129.557	573.997	180.652	249.359	67.4305	73.5133	96.9682	calcium_transporter_E4
AAEL000236-RA	51.6154	71.0992	71.3392	124.811	105.338	162.558	98.9978	54.0143	51.2419	62.1794	AaegFOXX_
AAEL000242-RA	40.0551	47.1841	40.8415	36.8673	70.6838	41.6496	44.6616	41.6165	58.8454	39.818	potassium_transpt_E6
AAEL000250-RA	38.9974	40.9418	45.9452	39.7518	42.6101	80.0845	43.3055	40.5262	42.6425	45.9241	AaegFOXP_E2
AAEL000264-RA	1346.73	846.676	1089.32	1519.9	2387.52	2790.16	1929.18	1473.93	2008.04	2006.51	phopholipase d
AAEL000278-RA	551.821	370.036	565.308	1000.5	2006.04	2472.11	1293.78	603.804	636.294	311.798	poly(p)/atp nad kinase
AAEL000297-RA	106.703	188.83	173.999	234.997	329.546	331.609	189.539	81.2035	84.0968	69.7806	Mitochondrial ribosomal protein S25_E4
AAEL000314-RA	287.723	573.225	428.795	1830.7	2663.21	1461.81	983.734	598.629	1056.77	548.654	Malate dehydrogenase A_ORF
AAEL000321-RA	3413.83	1370.59	778.676	4259.91	7624.31	5536.77	2374.31	2984.49	2998.32	1022.85	acetyl-coa synthetase
AAEL000322-RA	1756.81	1222.64	1170.53	3566.43	9883.9	7143.89	1831.35	3027.81	1023.74	1767.2	hypothetical protein
AAEL000384-RA	41.346	52.8931	47.1728	55.2192	56.6518	112.715	43.7063	45.7274	48.6798	54.6888	acetylcholine_transpt_E2
AAEL000399-RA	400.659	553.109	690.552	1412.34	1988.29	2041.86	1131.6	320.415	349.938	643.074	conserved hypothetical protein
AAEL000417-RA	97.5108	108.661	73.6167	81.814	186.755	302.617	126.19	91.6394	94.748	112.498	AA_transpt_E1-2
AAEL000464-RA	653.985	905.975	858.005	1294.56	1636.39	1792.64	1321.07	586.248	984.9	438.914	conserved hypothetical protein
AAEL000467-RA	54.2816	59.7579	90.2499	55.942	296.596	153.067	62.9553	43.7921	47.2146	45.4782	Mitochondrial ribosomal protein, L49, putative_E1
AAEL000564-RA	760.798	284.515	431.195	903.835	1488.11	1457.45	839.629	944.608	739.376	690.648	myotubularin		AAEL000564-RB myotubularin
AAEL000567-RA	53.2357	66.3296	57.3794	66.9614	115.062	91.3339	76.379	57.3498	59.7955	70.2303	sugar_transporter_E2
AAEL000588-RA	2365.24	2329.34	2417.01	3601.96	6380.57	5812.56	2751.86	1356.19	2072.91	2259.99	conserved hypothetical protein
AAEL000642-RA	328.585	255.503	133.731	466.556	4713.24	6229.23	3735.7	420.503	176.777	207.22	AA_transpt_E1
AAEL000643-RA	230.37	185.061	214.146	340.386	459.101	468.108	301.014	262.886	262.548	204.625	zinc finger protein
AAEL000649-RA	1236.32	855.99	1415.34	3205.93	4120.67	4223.32	3791.18	793.649	1195.4	1003.79	conserved hypothetical protein
AAEL000700-RA	170.77	333.099	371.393	402.135	435.381	533.721	408.853	171.119	212.215	220.591	cadherin
AAEL000716-RA	1544.09	1100.52	1468.2	2448.99	3514.92	2787.69	1501.03	1430.86	1218.05	1031.59	chondroitin 4-sulfotransferase
AAEL000741-RA	50.2253	84.5812	90.596	195.863	201.225	230.201	143.75	57.4283	52.3642	45.1292	AaE74_com1+com2
AAEL000745-RA	134.451	876.221	786.984	1574.44	2981.77	3951.75	2011.31	252.222	210.96	123.493	hypothetical protein
AAEL000764-RA	46.4872	58.0396	89.3586	192.539	394.859	575.159	257.541	44.6162	43.7629	42.3116	hypothetical protein
AAEL000797-RA	102.632	1330.35	1315.77	546.189	1188.52	2178.98	801.183	114.915	146.582	173.792	dimethylaniline monooxygenase
AAEL000813-RA	72.1208	78.27	208.341	82.4903	500.546	63.4914	215.063	58.2068	71.5602	99.8172	dimethylaniline monooxygenase
AAEL000820-RA	128.636	109.14	251.33	624.156	856.38	672.365	296.73	94.3167	149.506	376.26	dimethylaniline monooxygenase
AAEL000823-RA	3768.94	4020.29	4096.83	6926.49	8722.46	10856.2	7311.21	1897.59	4584.33	2813.64	Ribosomal protein L35A, putative_E1+E2
AAEL000824-RB	403.386	654.011	815.435	1128.31	1710.53	1627.58	860.46	761.05	530.378	662.568	hypothetical protein
AAEL000840-RA	1311.86	1214.71	881.495	1989.76	2367.15	2345.71	1947.1	923.201	1380.04	634.208	skeletal muscle/kidney enriched inositol 5-phosphatase
AAEL000874-RA	135.307	144.893	244.141	602.788	1167.77	1101.52	290.307	219.356	149.094	201.815	hypothetical protein
AAEL000910-RA	125.059	174.729	124.929	204.36	165.765	943.525	390.871	148.217	150.959	325.407	conserved hypothetical protein
AAEL000930-RB	848.732	1463.45	2168.65	2624.21	2787.69	3140.75	2184.26	968.635	840.324	950.085	conserved hypothetical protein
AAEL000937-RA	48.7132	52.6387	50.7906	46.5356	66.3494	104.401	67.277	55.3764	50.416	52.889	conserved hypothetical protein
AAEL000955-RA	1272.09	1288.26	1394.52	1572.06	2063.84	2713.26	2361.87	1422.65	1599.76	1166.21	conserved hypothetical protein
AAEL000985-RA	371.554	694.462	935.717	1296.49	1677.85	1562.84	1232.02	591.195	585.558	464.167	conserved hypothetical protein
AAEL000993-RA	535.86	1131.73	1240.72	1443.67	2071.81	2430.82	1695.85	361.595	526.779	270.872	dally
AAEL001059-RA	58.904	83.6839	84.2843	120.954	314.765	314.374	191.979	59.619	69.4153	89.8922	GSTD1-6 protein, putative
AAEL001066-RA	50.6945	51.7459	63.2227	174.992	240.5	117.252	107.243	55.7612	51.1634	49.0577	Mitochondrial ribosomal protein, L22, putative_E1
AAEL001073-RA	45.6584	62.1876	98.9547	53.5608	300.268	44.381	60.3792	44.0869	43.5512	46.3985	malic enzyme A_ORF
AAEL001100-RC	1551.03	12593.4	9489.32	10771.6	28168.1	31118.3	10811.9	2130.78	6801.84	6123.98	phosphoserine phosphatase	AAEL001100-RB phosphoserine phosphatase; AAEL001100-RA phosphoserine phosphatase;;
AAEL001132-RA	2664.49	2432.39	2746.46	4217.65	5404.07	5327.4	4291.36	2344.08	2973.73	2340.33	conserved hypothetical protein
AAEL001173-RA	451.057	723.456	647.372	937.175	986.049	1115.8	863.233	455.751	395.4	352.17	amidase
AAEL001184-RA	88.4877	152.432	124.555	169.076	203.637	281.438	196.156	99.788	95.2061	81.5667	conserved hypothetical protein
AAEL001209-RA	91.5118	88.453	156.371	776.387	923.82	829.944	414.229	133.098	128.028	82.0227	sodium_channel_E1-2
AAEL001233-RA	334.944	211.987	195.408	570.973	808.571	871.569	456.01	133.891	178.995	141.117	hypothetical protein
AAEL001293-RA	3048.77	10062.1	16681.6	32465.8	52039.9	54047.5	34787.1	11157.1	15139.6	9537.48	conserved hypothetical protein	AAEL001293-RB conserved hypothetical protein
AAEL001307-RA	275.106	2577.85	11692.7	37094.5	80669.6	77806.2	6225.59	573.192	3297.61	2806.86	SEC14, putative
AAEL001308-RA	4384.46	3256.88	1987.84	6831.08	10193.7	7094.1	3530.58	1973.14	4189.15	1781.73	CRAL/TRIO domain-containing protein
AAEL001309-RA	39.402	39.6447	91.5033	464.957	1195.48	1899.22	390.439	43.9241	40.768	44.3524	conserved hypothetical protein
AAEL001316-RA	103.038	382.668	431.46	622.091	438.495	671.357	439.933	117.841	176.755	130.125	conserved hypothetical protein
AAEL001328-RA	1273.85	2955.72	2337.48	4594.19	6669.55	8719.42	3765.14	712.052	1032.13	378.783	hypothetical protein
AAEL001349-RA	41.0916	42.8205	44.3114	60.557	40.6677	96.6458	49.9378	42.3733	44.7083	42.9167	zinc finger protein
AAEL001355-RA	1570.76	1227.85	2142.47	3115.87	3605.19	3502.28	3052.41	1426.22	1583.46	1312.26	conserved hypothetical protein
AAEL001376-RA	256.403	364.683	396.475	588.689	743.657	951.882	722.732	178.281	234.099	346.378	hypothetical protein
AAEL001388-RA	117.055	223.255	311.959	601.202	680.432	942.754	742.994	157.226	366.056	106.297	hypothetical protein
AAEL001401-RA	22848.7	16795.5	18296.2	30546.6	48202.7	56173.6	43711.2	22172.4	16366.4	15046.3	conserved hypothetical protein
AAEL001403-RA	965.163	1304.93	1421.64	3220.14	4864.07	5944.1	5004.16	1062.15	1527.64	908.375	conserved hypothetical protein
AAEL001414-RA	46684.6	37518.9	41998.3	62013.3	93402.7	118156	98488.7	44028.6	26830.5	19918.8	conserved hypothetical protein	AAEL001414-RB conserved hypothetical protein
AAEL001415-RA	410.818	339.193	455.497	896.199	758.615	1204.88	684.835	439.348	450.916	453.981	hypothetical protein	AAEL010293-RA hypothetical protein
AAEL001429-RA	688.86	899.919	951.336	1252.07	1467.73	2346.81	2309.56	708.902	1402.49	989.614	AA_transpt_E8	IH|0895|VB|AAEL007193|AA_transpt|E8; IH|0081|VB|AAEL001429|AA_transpt|E8; IH|0895|VB|AAEL007193|AA_transpt|E8
AAEL001433-RA	75.0352	108.138	222.12	881.836	1938.42	2464.38	824.505	78.4947	70.3377	95.1272	fgf receptor activating protein
AAEL001448-RA	1213.15	428.718	1663.19	2532.29	2621.79	2416.83	410.694	1475.21	1241.74	1715.1	conserved hypothetical protein
AAEL001480-RA	1068.92	1828.66	3761.77	10630.7	13206.4	13344.5	3165.29	1647.39	2630.53	2052.25	phosphoglucomutase
AAEL001499-RA	66.5168	43.974	44.7376	86.4294	83.5789	391.674	99.367	68.7544	60.9384	178.87	conserved hypothetical protein
AAEL001548-RA	1558.19	2647.72	2033.71	5401.57	8307.33	7981.84	4956.32	2236.93	3040.79	1407.25	glucosyl/glucuronosyl transferases
AAEL001561-RD	1857.99	1840.36	2374.57	3947.71	6059.17	6290.4	4833.22	1484.67	1811.4	982.003	conserved hypothetical protein	AAEL001561-RB conserved hypothetical protein; AAEL001561-RC conserved hypothetical protein; AAEL001561-RA conserved hypothetical protein;
AAEL001562-RA	403.539	480.349	532.198	467.682	837.071	780.835	506.997	369.459	477.726	364.884	hypothetical protein
AAEL001586-RA	1839.79	3279.96	3352.23	5038.1	5973.69	6057.95	6040.86	5044.34	4906.2	2396.66	glucosyl/glucuronosyl transferases	AAEL001586-RB glucosyl/glucuronosyl transferases
AAEL001589-RA	354.182	161.364	199.573	274.212	324.214	683.642	302.994	168.184	311.584	408.1	hypothetical protein
AAEL001615-RA	35.2595	38.986	38.1572	47.8491	44.3586	130.314	32.43	36.6905	38.0903	34.6676	Mitochondrial ribosomal protein, S18C, putative_E1
AAEL001646-RA	43.8399	57.2763	96.7332	62.2254	161.181	46.8079	57.5133	51.2963	46.5555	55.8667	potassium_transpt_E1
AAEL001647-RA	734.085	537.422	468.257	720.676	1610.29	1995.58	1586.57	579.93	651.647	573.861	hypothetical protein
AAEL001650-RA	96.6228	128.85	133.575	211.18	256.269	463.915	174.771	77.7845	81.7281	178.509	conserved hypothetical protein
AAEL001658-RA	44.5176	54.0429	51.0908	50.8752	89.3738	76.4704	54.8818	44.9684	46.5587	70.5894	sodium_channel_E2
AAEL001659-RA	61.2246	102.796	69.0907	102.939	104.531	186.175	110.753	85.6217	84.0242	61.6886	Misexpression suppressor of ras_E2
AAEL001664-RA	129.458	201.524	185.994	372.843	645.545	1023.08	519.165	94.7083	82.963	87.8576	hypothetical protein
AAEL001685-RA	45.6966	53.5535	110.72	103.448	104.674	153.843	109.113	44.4119	45.7299	47.5908	conserved hypothetical protein
AAEL001692-RA	70.3255	93.9859	156.58	376.909	681.37	826.325	505.363	55.7128	59.2751	50.9051	conserved hypothetical protein
AAEL001698-RA	1182.44	1387.03	1772.13	2019.44	2444.15	2446.96	2180.64	1140.16	1061.91	856.991	charged multivesicular body protein 4b
AAEL001724-RA	432.743	1536.99	1242.42	1461.27	2299.76	2341.41	3007.64	511.116	534.251	328.264	conserved hypothetical protein
AAEL001772-RA	37.0817	45.0835	36.3652	42.2657	39.4794	225.614	36.4163	39.4195	41.3908	38.6135	conserved hypothetical protein
AAEL001774-RA	570.684	713.791	723.515	1179.61	1205	1715.8	908.074	205.051	511.237	265.999	hypothetical protein
AAEL001782-RA	665.462	900.793	1001.9	1419.76	1837.65	1779.47	1321.45	736.29	616.851	714.682	conserved hypothetical protein
AAEL001804-RA	266.214	262.602	579.664	1223.65	684.292	589.777	222.25	191.822	118.871	225.244	glucosyl/glucuronosyl transferases
AAEL001805-RA	567.118	698.504	795.418	1017.18	1198.4	1411.93	1218.3	426.624	431.203	486.213	conserved hypothetical protein
AAEL001812-RA	243.51	302.952	346.988	429.589	800.255	1117.67	537.531	117.044	207.975	121.382	Organic_transpt_E1
AAEL001813-RA	73.9819	89.8581	82.6734	153.662	415.491	479.665	208.061	48.7017	45.0964	94.6836	sodium_channel_E1-4
AAEL001830-RA	4394.27	5864.68	6530.39	7249.67	9146.84	13931.3	6005.91	3820.76	3618.31	2908.04	geranylgeranyl transferase type i beta subunit
AAEL001844-RA	2879.72	3466.46	6750.12	19685.7	40686.2	35271.4	11892.4	3377.77	2784.85	3334.83	zinc carboxypeptidase
AAEL001845-RA	3553.2	3473.75	6729.83	11027.1	12811.2	9005.93	3676.63	4474.05	3431.56	3904.89	short-chain dehydrogenase
AAEL001854-RA	1325.92	880.394	1367.88	2394.88	3847.98	3337.41	1553.83	1736.23	1235.63	1945.08	hypothetical protein
AAEL001856-RA	1039.68	1241.89	1592.7	1809.24	1953.96	1812.99	608.897	786.697	728.592	875.432	adenosine kinase
AAEL001878-RA	52.9161	42.7313	55.3416	75.7302	60.2281	109.006	74.9235	55.4308	66.5924	53.8956	lipase
AAEL001951-RA	4529.67	6206.67	5940.87	7622.21	14098.4	20438.9	13080.8	12718.1	5763.33	3133.93	actin
AAEL002047-RA	17754.3	18027.8	14787.4	19594.8	21728.2	20382.8	12292.7	5666.01	10995.5	9115.92	40S ribosomal protein S10_E2
AAEL002053-RA	38.3927	47.3017	79.3248	39.2734	145.217	42.0963	44.6156	40.157	46.7121	44.0781	homeobox protein abdominal-A, putative
AAEL002082-RA	183.747	287.341	181.765	301.15	387.708	395.001	222.989	165.007	218.13	158.617	latent nuclear antigen, putative
AAEL002117-RA	48.309	68.4017	64.112	112.768	74.6684	150.857	95.1109	46.6003	47.8647	48.3312	conserved hypothetical protein
AAEL002136-RA	920.188	1180.8	1155.51	1482.96	2139.57	2127.77	1780.82	1123.88	1083.72	1157.98	hypothetical protein
AAEL002142-RA	906.469	711.912	688.952	775.741	1342.1	2217.88	1816.39	1090.46	840.752	1069.22	conserved hypothetical protein
AAEL002181-RA	213.334	518.808	540.417	1266.13	1308.43	1494.43	623.438	99.262	199.469	129.282	cuticle protein, putative
AAEL002185-RA	383.64	664.659	586.936	1150.41	1458.54	2012.78	1312.39	222.386	134.907	96.4707	cuticle protein, putative
AAEL002191-RA	51.1554	54.3583	55.3519	115.527	133.986	429.069	154.873	46.6546	46.6679	54.9373	cuticle protein, putative
AAEL002214-RA	173.886	163.587	212.382	194.976	352.808	275.963	105.598	154.997	130.714	127.534	AA_transpt_E3
AAEL002216-RA	1289.95	1526.31	1687.58	2490.62	2751.24	2786.25	2144.26	1019.83	1148.35	729.206	5-amp-activated protein kinase, beta subunit
AAEL002216-RB	2512.71	2475.18	2932.32	3928.32	4350.22	4540.64	4007.1	2135	2262.84	1473.49	5-amp-activated protein kinase, beta subunit
AAEL002221-RA	2662.96	2663.54	2773.48	3362.38	5391.1	6516.06	5392.55	2857.28	2676.5	3251.93	calcium and integrin-binding protein 1
AAEL002240-RA	63.1639	96.1423	90.8646	183.11	98.8664	195.483	101.581	69.7666	68.9804	100.443	signal transducing adapter molecule_E1
AAEL002246-RA	41.8085	53.3504	82.0727	277.797	429.753	577.65	265.634	41.5803	38.3257	36.3466	cuticle protein, putative
AAEL002261-RA	4764.83	4193.19	4206.84	6331.31	8915.62	8607.83	4455.15	4063.65	5288.98	7561.82	gtp cyclohydrolase I_E6
AAEL002294-RA	176.267	251.979	238.124	385.535	483.62	533.67	305.493	109.021	119.121	149.254	sulphatetransporter_E1+E2+E3+E4+E5
AAEL002299-RA	149.535	194.773	318.602	334.623	785.899	359.035	369.18	155.228	135.263	165.805	copper_E1
AAEL002358-RA	1148.31	843.907	1072.63	1406.26	2242.24	2877.13	1973.1	1793	1379.25	1429.19	conserved hypothetical protein
AAEL002388-RA	4784.45	4891.8	4001.57	4935.08	10571.7	16007.2	11279.3	11150.4	6021.03	13691.3	zinc finger protein	AAEL012224-RA zinc finger protein
AAEL002412-RA	327.507	263.722	379.508	1010.03	1941.78	1486.85	1015.79	370.733	1004.17	343.111	AA_transpt_E2
AAEL002413-RA	2005.21	1734	2422.53	10797	20822.1	18700.4	6081.37	1674.63	8719.49	5923.75	sphingomyelin phosphodiesterase
AAEL002415-RC	433.367	612.406	761.072	860.126	910.798	1007.66	961.897	453.001	430.808	412.556	pinch	AAEL002415-RB pinch; AAEL002415-RA pinch;;
AAEL002419-RA	404.553	300.351	441.156	674.402	940.153	613.417	354.179	372.56	379.109	410.999	sarcolemmal associated protein-2, putative
AAEL002426-RA	2723.45	4233.33	4507.38	6175.3	5707.92	6641.33	3879.67	2132.81	2309.59	3397.97	conserved hypothetical protein
AAEL002447-RA	339.193	282.957	364.062	1145.6	1694.17	1536.48	1188.48	342.365	606.393	319.243	hypothetical protein
AAEL002453-RA	932.164	1172.55	1128.49	1466.05	1984.39	2195.53	1652.43	1130.97	1087.48	1189.79	conserved hypothetical protein
AAEL002464-RA	2061.3	1619.94	2130.77	3200.75	3650.79	3635.82	2339.46	1447.11	1389.13	1626.54	vacuolar atp synthase subunit f
AAEL002496-RA	238.004	228.445	212.79	297.334	407.093	783.277	415.908	206.169	208.579	230.465	hypothetical protein
AAEL002511-RA	207.068	232.648	196.924	220.689	412.199	503.057	489.1	192.683	244.866	149.929	ionotropic glutamate receptor subunit ia
AAEL002516-RA	2339.02	2259.73	2746.79	3337.64	4673.44	5122.39	5012.83	4015.82	3963.71	3110.3	conserved hypothetical protein	AAEL012941-RA conserved hypothetical protein
AAEL002518-RA	66.3374	73.9292	56.8729	101.366	357.295	147.468	101.425	72.8945	70.4305	63.4188	glutamate receptor, ionotropic kainate 1, 2, 3 (glur5, glur6, glur7)
AAEL002520-RA	1328.98	1557.41	1275.3	1652.02	2733.01	2996.67	2810.72	1057.02	1630.08	786.87	apolipoprotein D, putative
AAEL002528-RA	319.129	366.34	206.938	298.09	504.981	790.68	621.534	278.83	348.096	317.041	histone deacetylase
AAEL002545-RA	158.448	352.786	355.118	551.477	593.445	736.932	560.475	114.324	156.091	214.774	hypothetical protein
AAEL002555-RA	305.264	176.545	306.124	640.447	962.281	1006.03	813.654	161.759	116.709	120.18	sodium_channel_E1-3
AAEL002557-RA	961.819	5339.8	6226.34	6052.66	10152	14864.7	4438.47	412.452	2015.26	2045.44	AA_transpt_E10		DS|0242|VB|AAEL002557|cationic amino acid transporter|E10; DS|0242|VB|AAEL002557|cationic amino acid transporter|E10; DS|0242|VB|AAEL002557|cationic amino acid transporter|E10; IH|0119|VB|AAEL002557|AA_transpt|E10; DS|0242|VB|AAEL002557|cationic amino acid transporter|E10; DS|0242|VB|AAEL002557|cationic amino acid transporter|E10
AAEL002565-RA	803.712	1235.95	1005.34	1124.33	1972.52	2657.44	1815.09	1077.43	1224.97	571.681	titin
AAEL002607-RA	494.366	494.931	703.395	1047.95	1650.04	1405.4	898.057	298.498	702.49	544.117	conserved hypothetical protein
AAEL002611-RA	115.98	178.257	193.577	276.172	342.726	376.924	308.193	77.9794	109.821	97.4319	conserved hypothetical protein
AAEL002621-RA	155.357	216.932	537.994	1529.43	2169.89	1705.43	603.23	271.483	480.91	461.18	hypothetical protein
AAEL002628-RA	537.718	375.253	531.332	772.854	1324.25	1328.93	652.147	485.582	530.635	526.444	hypothetical protein
AAEL002629-RA	5173.52	3829.33	3320.96	4746.69	9053.27	7290.65	4504.95	5898.56	6439.17	5714.24	serine protease
AAEL002637-RA	39.0515	52.8108	53.588	175.186	213.727	410.053	212.789	44.9422	43.1574	42.3351	tripartite motif protein trim9
AAEL002657-RA	57.4634	88.2107	104.197	335.177	447.638	438.752	122.444	62.853	59.0986	54.2693	conserved hypothetical protein
AAEL002678-RA	598.352	666.638	720.947	1116.21	1717.53	2042.14	2211.85	709.575	947.116	454.915	ras suppressor protein 1, rsu1
AAEL002733-RA	64.6281	70.4618	148.37	114.904	368.1	57.6522	143.8	76.7314	144.401	148.139	NEUROPEPTIDE_F_NPF_ORF
AAEL002777-RA	413.735	540.696	551.312	859.236	1553	1888.84	1035.68	517.765	863.134	670.732	conserved hypothetical protein
AAEL002793-RA	562.334	728.896	744.491	2517.89	2030.35	1355.66	799.878	804.067	408.113	255.148	conserved hypothetical protein
AAEL002798-RA	561.353	594.365	1082.88	1313.16	1152.14	1232.51	311.083	527.961	441.815	548.412	conserved hypothetical protein
AAEL002803-RA	64.8354	63.4814	76.6627	106.044	151.305	223.969	192.209	72.2014	68.3972	57.1411	conserved hypothetical protein
AAEL002844-RA	2394.73	2347.85	2763.84	2615.62	3839.05	5442.69	4427.55	2121.23	1971.26	2533.27	conserved hypothetical protein
AAEL002862-RA	324.849	335.413	243.599	515.901	1066.59	1240.99	548.778	282.208	483.96	306.006	tensin
AAEL002903-RA	379.751	136.39	322.659	170.94	749.037	131.163	312.946	296.577	263.824	387.778	PHOSPHOINOSITIDE_3_KINASE_CATALYTIC_SUBUNIT_ALPHA,BETA,DELTA_ORF
AAEL002999-RA	101.321	157.496	148.136	205.397	390.323	399.383	99.4722	120.621	140.046	122.691	gtpase_rho
AAEL003113-RA	348.602	630.381	587.872	626.912	942.664	1237.66	950.136	448.325	694.699	831.229	conserved hypothetical protein
AAEL003144-RA	265.221	333.885	396.951	444.217	676.144	367.323	506.603	405.061	341.981	521.307	conserved hypothetical protein
AAEL003173-RA	46.8134	44.7903	48.2617	71.761	66.1895	109.279	63.4041	43.1713	54.5861	67.2021	AaegFOXA_
AAEL003184-RA	279.359	231.837	144.505	161.285	86.9721	526.459	175.319	173.592	172.236	203.079	MFS_transpt_E4
AAEL003215-RA	721.382	818.324	1088.48	1064.84	1153.77	1316.34	1169.62	706.421	612.28	934.059	heat shock factor binding protein, putative
AAEL003229-RA	3790.69	3510.91	4889.41	7855.79	8244.48	7485.6	3263.74	3062.57	5481.54	3234.54	hypothetical protein
AAEL003283-RA	328.118	404.029	412.207	452.385	928.529	777.467	568.778	327.033	295.468	319.493	bitesize isoform
AAEL003288-RA	174.984	334.996	227.211	632.832	754.884	947.299	523.435	350.666	382.646	442.429	mitochondrial uncoupling protein, putative
AAEL003294-RA	283.499	414.826	468.393	1248.65	2648.2	3638.4	2062.75	170.682	258.84	121.786	fibrinogen and fibronectin
AAEL003312-RA	97.7601	812.242	4153.87	27983.4	61446.9	84767.7	47916.1	123.243	109.466	86.1508	hypothetical protein
AAEL003314-RA	94.0227	120.854	107.924	160.607	270.949	344.185	154.653	165.783	169.331	180.199	hypothetical protein
AAEL003321-RA	137.172	53.5108	120.425	744.629	700.43	370.017	46.8821	81.2515	111.268	113.745	hypothetical protein
AAEL003329-RA	42.229	56.6062	61.5771	52.4759	91.335	43.9899	65.0965	41.5088	41.0389	49.494	conserved hypothetical protein
AAEL003396-RA	5577	5847.14	5551.41	11536.4	9400.7	10563.3	8470.82	1758.6	5878.8	2503.19	60S ribosomal protein L32_E1
AAEL003426-RA	95.6586	59.5995	153.338	65.3848	315.981	47.9828	207.699	71.4372	44.3823	146.776	sodium_channel_E1-4
AAEL003433-RA	1026.68	1573.6	1227.4	1804.68	2482.55	3386.54	2805.09	1233.55	1407.34	1076.17	copper-transporting atpase 1, 2 (copper pump 1, 2)
AAEL003444-RA	55.62	60.9681	117.216	96.5352	290.893	57.2494	233.411	48.0231	53.2117	66.7454	caspase-1_E1
AAEL003469-RA	46.1074	37.7503	35.4425	59.5031	36.4034	278.239	32.494	46.1896	35.8846	49.0114	NHP2 protein, putative_E3
AAEL003504-RA	131.868	222.143	234.126	319.459	395.362	414.609	333.043	94.4548	106.18	103.105	emx homeobox protein
AAEL003518-RA	681.323	943.118	1054.67	1738.32	1785.79	1581.57	668.097	316.588	578.846	236.744	calcium-transporting atpase 2 (atpase 2)
AAEL003548-RA	154.482	199.248	145.563	362.187	314.89	425.638	333.737	147.255	181.444	109.881	sulphatetransporter_E1+E2
AAEL003627-RA	44.6966	50.7729	45.6572	45.9076	41.9695	97.2176	47.0975	42.5666	44.3776	54.2968	AA_transpt_E1
AAEL003628-RA	470.098	292.399	240.746	425.087	660.187	941.288	818.641	364.3	413.709	346.568	clip-domain serine protease, putative
AAEL003630-RA	679.55	540.648	589.829	786.253	1314.81	2081.85	2081.76	708.628	711.245	760.934	conserved hypothetical protein
AAEL003651-RA	728.888	827.275	1572.53	4654.43	7305.47	6988.48	1146.83	820.578	658.65	873.892	conserved hypothetical protein
AAEL003653-RA	79.9763	166.781	147.133	287.067	259.648	366.065	206.683	72.2703	86.708	65.3344	serine protease inhibitor, serpin_E1
AAEL003656-RA	2368.33	3853.71	3736.32	6559.43	8027.15	6825.35	5703.62	3955.16	3187.48	1309.38	hypothetical protein
AAEL003688-RA	237.287	95.835	270.986	181.403	691.081	159.392	334.341	393.477	245.336	319.167	conserved hypothetical protein_E7+8
AAEL003727-RA	43.7101	41.4761	53.3713	94.4959	89.5999	69.2483	43.557	58.4619	42.9229	50.9023	ninjurin a
AAEL003899-RA	230.862	240.491	402.051	1356.62	3283.1	2401.24	1965.18	288.356	248.509	178.913	sugar_transporter_E5
AAEL003903-RA	3653.74	2729.21	4407.16	11007.9	21093.8	20585.2	3918.76	4148.31	3664.28	4830.66	acid phosphatase-1
AAEL003904-RA	38.2578	42.0021	46.3334	47.16	82.1392	209.038	51.3685	44.9418	42.7904	61.3116	conserved hypothetical protein
AAEL003929-RA	1589.91	1459.72	2000.78	2690.72	5795.56	4600.85	3398.22	1815.47	1392.66	1351.13	conserved hypothetical protein
AAEL003962-RA	108.116	176.915	244.129	296.052	445.402	324.419	273.582	84.9682	107.226	107.749	hypothetical protein
AAEL003977-RA	1982.57	1440.46	2074.62	3306.72	4436.42	3875.7	3287.79	1494.85	1539.32	811.309	elongase, putative
AAEL003986-RD	3655.05	5639.8	13384.3	29897.4	37959.5	37421.5	22573.9	4347.6	4237.41	3723.64	conserved hypothetical protein	AAEL003986-RB conserved hypothetical protein; AAEL003986-RC conserved hypothetical protein; AAEL003986-RE conserved hypothetical protein; AAEL003986-RA conserved hypothetical protein
AAEL004022-RA	769.713	740.656	746.45	972.127	1904.22	2885.2	1431.3	657.262	720.19	295.322	carboxylesterase
AAEL004074-RA	2145.51	1222.76	1276.13	1952.01	3606.31	4910.6	3594.32	2257.67	2771.7	2771.12	conserved hypothetical protein
AAEL004083-RA	794.065	1530.53	815.81	1316.65	2338.07	2451.26	663.942	656.174	1198.49	640.773	wd-repeat protein
AAEL004103-RA	44.6858	45.4165	47.7318	70.1623	53.0333	98.8251	43.7336	47.8441	44.6235	41.817	deoxyribonuclease I, putative
AAEL004174-RA	53.9222	107.612	86.378	119.312	228.973	374.313	180.867	57.556	58.2841	78.4549	t-box transcription factor tbx6
AAEL004201-RA	56.3372	53.6062	132.723	61.8286	315.665	48.1835	84.8193	55.0126	53.7839	70.3693	voltage-dependent p/q type calcium channel
AAEL004213-RA	276.952	113.826	310.437	182.985	350.285	547.246	147.228	114.132	59.6067	263.965	AA_transpt_E2-3
AAEL004230-RA	982.612	1567.42	673.119	918.539	1602.36	2719.42	747.472	325.883	677.811	376.92	hypothetical protein	AAEL004230-RB hypothetical protein
AAEL004242-RA	3523.15	5544.55	6023.79	7076.12	8024.96	9457.44	8063.44	5506.47	7165.77	8427.84	Juvenile hormone-inducible protein, putative
AAEL004245-RA	52.0726	44.3998	40.1761	47.8439	49.2887	103.352	40.1601	44.8177	46.1391	43.7009	alpha-2 adrenergic receptor
AAEL004256-RA	143.951	76.9942	185.094	100.952	478.004	241.758	220.583	70.699	59.0997	118.283	sodium_channel_E1-3
AAEL004307-RA	824.489	844.767	620.347	1089.02	1758.43	2115.87	1358.79	782.999	1001.43	707.998	n-myc downstream regulated	AAEL004307-RB n-myc downstream regulated; AAEL004307-RC n-myc downstream regulated;;
AAEL004325-RA	1008.58	1459.87	1851.31	2902.26	5759.27	7281.12	3611.88	1640.49	1367.54	1029.54	Ribosomal protein L5_E2
AAEL004331-RA	55.0057	52.522	143.39	66.4894	434.408	52.2942	150.13	49.5943	47.4775	68.6837	ABC_transporter_E1+E2+E3
AAEL004398-RA	47.1717	69.1446	116.15	298.226	594.241	1070.42	400.44	51.6896	50.098	48.0798	g protein-coupled receptor
AAEL004409-RA	902.677	1153.57	1004.03	1236.61	1810.9	2256.69	2103.75	821.579	1419.55	561.243	yellow protein, putative
AAEL004418-RA	44.4142	53.771	73.1983	64.2103	84.1464	157.222	85.7184	49.895	47.8427	49.1913	hypothetical protein
AAEL004443-RA	1292.94	1788.5	2252.96	4885.13	5904.03	5827.25	5423.22	2276.07	2537.77	1227.73	nitrilase, putative	AAEL013049-RA nitrilase, putative
AAEL004464-RA	138.697	79.2924	235.124	137.767	575.191	166.871	275.87	120.68	77.0463	138.732	Organic_transpt_E3
AAEL004476-RA	144.44	188.227	344	673.993	759.045	937.727	460.49	169.161	125.814	154.871	conserved hypothetical protein
AAEL004480-RA	1492	1378.79	2056.1	3012.45	3820.64	3003.66	1128.46	1880.12	1616.02	1986.7	cell division cycle 20 (cdc20) (fizzy)
AAEL004483-RA	528.048	338.101	655.826	859.841	1127.88	1975.11	1275.69	408.474	556.836	684.261	hypothetical protein
AAEL004516-RA	40.974	62.772	62.2931	88.6088	170.574	342.356	266.542	158.613	53.6776	56.0593	conserved hypothetical protein
AAEL004542-RA	237.609	122.49	273.534	575.035	761.92	487.548	462.343	283.998	409.307	376.071	ceramide kinase		AAEL015603-RA ceramide kinase
AAEL004575-RA	789.799	686.152	563.167	1333.86	1489.76	2097.31	1448.03	475.178	983.985	676.588	beta-galactosidase
AAEL004582-RA	503.52	312.812	341.295	898.12	1581.72	1861.55	766.177	257.92	266.104	257.133	beta-galactosidase
AAEL004588-RA	243.75	536.416	680.892	1651.22	2168.13	4230.13	2762.6	533.458	903.874	618.056	conserved hypothetical protein
AAEL004619-RA	46.6747	63.8982	90.2393	84.272	152.28	45.8051	88.7113	42.8146	46.0736	51.9793	hypothetical protein	AAEL009332-RA hypothetical protein
AAEL004682-RA	2084.52	1843.73	2414.96	2138.16	2759.66	3724.19	2607.63	1950.93	2306.7	2743.18	conserved hypothetical protein
AAEL004709-RA	633.853	1191	1797.83	2322.43	3026.78	2704.57	571.502	823.71	754.544	848.99	protein phosphatase type 2c
AAEL004753-RA	44.939	69.2165	50.0198	70.2836	84.7799	216.33	80.1914	51.1243	46.3107	62.7836	sodium_channel_E1-4
AAEL004764-RA	67.4779	82.7387	94.4722	140.441	219.926	304.763	160.118	55.8595	59.8446	55.9649	pupal cuticle protein, putative
AAEL004791-RA	421.126	441.808	656.633	800.379	1669.88	1507.73	389.933	575.475	360.361	529.1	sorting nexin
AAEL004814-RA	120.619	80.5192	107.807	133.936	309.96	215.151	171.915	83.7911	84.9521	174.262	potassium-dependent sodium-calcium exchanger, putative
AAEL004836-RA	39.9124	35.8372	38.4165	36.1364	83.029	41.1814	41.9718	35.5192	38.6976	44.0659	sodium_channel_E4
AAEL004857-RA	49.0197	60.6792	89.3284	86.2747	156.663	44.7152	105.166	44.3933	44.93	53.0412	conserved hypothetical protein
AAEL004870-RA	40.3946	43.2861	46.2492	111.638	347.483	268.331	35.6885	49.6775	47.8425	49.9993	cytochrome P450_E2
AAEL004884-RA	787.028	643.63	1163.21	4566.61	6143.36	4768.87	1199.69	1506.34	1479.77	1281.12	hemomucin
AAEL004888-RA	44.9778	74.9872	71.7485	53.0426	103.198	38.9876	65.1054	45.5864	44.4618	49.5295	AaegCYP306a1_E1
AAEL004902-RA	2727.51	2560.92	2726.66	3557.31	5871.25	7542.95	5491.63	4095.65	4579.87	3723.22	ras-related protein Rab-2A, putative
AAEL004905-RA	219.753	467.964	220.796	648.216	2831.31	4662.32	1864.88	410.008	332.675	238.47	AA_transpt_E1
AAEL004964-RA	88.2964	69.8962	64.6068	99.7087	179.719	276.572	72.3954	92.9683	76.7164	89.6776	hypothetical protein
AAEL005008-RA	460.926	1019	1855.56	2666.44	1909.43	1106.26	311.865	466.772	339.411	246.616	aquaporin_E1
AAEL005030-RA	251.69	153.505	166.205	988.682	4585.28	5638.48	1586.87	169.106	143.317	171.478	multidrug resistance protein 1 (atp-binding cassette C1)
AAEL005040-RA	1911.4	2732.89	4951.01	6479.04	9233.32	12194.9	10615.5	2000.82	1667.74	956.25	conserved hypothetical protein
AAEL005048-RA	892.929	755.883	913.126	1153.46	1549.97	1835.51	1948.56	981.741	1139.97	936.677	conserved hypothetical protein	AAEL005048-RB conserved hypothetical protein
AAEL005066-RA	1608.96	1572.92	1882.98	2650.25	3243.42	3146.75	1656.5	1599.36	2579.49	1827.59	lysosomal trafficking regulator	AAEL006935-RA conserved hypothetical protein
AAEL005071-RA	2355.43	1009.3	1319.67	2995.48	6703.32	6899.93	3609.68	3510.87	4792.96	5685.8	gtp binding protein
AAEL005086-RA	538.494	314.341	612.977	676.337	1145.62	1396.91	756.358	491.487	362.007	544.352	conserved hypothetical protein
AAEL005117-RA	90.4775	95.3776	253.988	316.597	949.504	891.726	477.95	60.4101	51.3039	91.453	hypothetical protein
AAEL005160-RA	53.635	64.4904	110.85	286.693	498.977	719.508	277.565	63.9123	50.3473	46.8245	sulphatetransporter_E1+E2+E3+E4+E5
AAEL005161-RA	98.289	92.8895	196.56	256.529	353.921	88.4277	199.932	63.576	75.376	136.525	hypothetical protein
AAEL005163-RA	68.329	95.422	170.903	92.9748	360.453	49.7745	237.429	53.0867	47.9058	75.0381	conserved hypothetical protein_E1
AAEL005249-RA	61.3983	67.4446	95.4633	59.5679	240.692	196.233	68.5029	54.7255	66.681	54.8599	ABC_transporter_E1+E2+E3+E4+E5
AAEL005258-RB	847.965	1002.24	991.411	1119.93	1573.26	2075.8	2072.47	872.558	1264.38	1148.82	syntaxin, putative
AAEL005265-RA	269.082	82.3442	129.013	425.91	1929.09	2940.19	1264.63	296.757	190.88	253.689	conserved hypothetical protein
AAEL005266-RA	56.3564	75.5067	68.6284	61.2327	80.3233	233.682	40.7452	52.8039	48.7329	84.9603	40S ribosomal protein S14_E1
AAEL005267-RA	140.071	168.036	253.156	429.939	926.709	808.574	72.8196	107.053	98.1776	92.7417	conserved hypothetical protein
AAEL005268-RA	39.1247	41.6699	52.8525	79.2099	69.7502	85.6762	34.9621	39.8432	42.7684	37.1074	hypothetical protein
AAEL005276-RA	439.502	306.443	307.252	631.4	766.112	800.272	356.774	420.055	342.39	356.028	target of myb1 (tom1)
AAEL005278-RA	67.1028	70.6412	154.386	105.827	538.532	116.263	229.449	55.2778	56.2619	88.5512	AA_transpt_E1
AAEL005333-RA	53.4939	102.097	65.7776	87.184	176.036	344.198	73.1983	60.8375	62.2032	93.2553	hypothetical protein
AAEL005381-RA	38.7103	43.4969	50.4196	93.4317	83.0988	120.074	54.6941	39.7999	39.1751	37.5715	AaDsf_E9.1
AAEL005403-RA	482.358	418.401	528.457	618.321	1060.24	1066.4	949.527	429.326	414.533	544.798	conserved hypothetical protein
AAEL005491-RA	167.704	575.349	208.737	422.563	576.042	721.331	321.433	310.854	463.868	221.282	abc transporter
AAEL005499-RA	114.973	219.372	284.299	266.042	671.877	615.686	472.448	144.301	164.078	180.719	atp-binding cassette transporter
AAEL005505-RA	473.79	206.108	283.628	929.918	1512.95	1561.79	520.619	495.548	331.786	360.02	conserved hypothetical protein		AAEL011678-RA centrosomal protein, putative
AAEL005520-RA	1329.53	1102.3	2172.32	4844.31	4613.45	3692.1	2306.72	1679.79	2119.54	1188.38	carbonic anhydrase	AAEL005520-RB carbonic anhydrase
AAEL005521-RA	8193.12	6128.41	6738.32	14948.8	20630.5	19428	12513.3	7333.5	8082.57	7237.89	prolylcarboxypeptidase
AAEL005531-RA	368.921	1163.16	1320.52	1627.24	2629.28	2815.91	2157.91	325.891	348.999	319.726	venom allergen
AAEL005581-RA	62.15	71.7489	79.3201	56.3644	127.675	359.178	76.8931	62.852	58.7035	95.9493	norepinephrine/norepinephrine transporter	IH|0095|VB|AAEL005581|AA_transpt|E4-6; IH|0095|VB|AAEL005581|AA_transpt|E4-6;;
AAEL005629-RA	4254.65	5826.7	4907.8	10482.9	9709.22	9183.88	8321.88	1805.86	6237.19	3311.07	Ribosomal protein L35, putative_E1
AAEL005653-RA	2656.49	3420.74	5104.88	8198.88	8404.74	8642.13	2121.75	2296.42	2228.97	2273.38	leukocyte receptor cluster (lrc) member 4 protein
AAEL005699-RA	1346.96	1682.42	1363.36	2606.68	5229.88	8144.97	4762.1	2026.14	1772.23	1573.84	membrane protein tms1d	AAEL005699-RB membrane protein tms1d
AAEL005722-RA	79.533	112.995	133.912	108.107	347.579	267.191	115.665	66.195	76.0548	64.4505	60S ribosomal protein L7a_E1
AAEL005747-RA	90.822	202.164	121.638	196.886	223.83	311.067	270.166	132.32	193.208	127.004	conserved hypothetical protein
AAEL005763-RA	1279.98	1099.15	3103.42	23747.3	31100.8	38176.4	18473.6	1699.96	2046.55	1269.51	lysosomal alpha-mannosidase (mannosidase alpha class 2b member 1)
AAEL005772-RA	9606.5	9975.03	39476.2	182722	252157	276203	99449	10478.9	59942.3	12598.2	Odorant-binding protein 99c, putative
AAEL005773-RA	68.9923	62.6905	65.979	119.543	244.233	482.069	215.39	54.6011	59.6078	61.1817	conserved hypothetical protein
AAEL005815-RA	1617.29	2332.08	1977.55	2709.12	4571.82	5619.57	5770.22	3075.47	3813.27	1820.15	Vitellogenin, putative_E1
AAEL005853-RA	59.921	84.8883	138.122	135.384	234.915	51.8382	122.394	59.2547	58.9382	77.18	AA_transpt_E3
AAEL005854-RA	88.742	92.8707	94.6845	126.343	151.356	236.621	151.64	63.2801	68.6107	103.568	AA_transpt_E7
AAEL005863-RA	827.761	488.715	550.258	855.329	2494.76	3092.62	1560.65	859.989	773.591	884.839	conserved hypothetical protein
AAEL005864-RA	71.3484	51.8039	74.5654	147.867	230.358	214.219	70.4236	181.162	123.904	162.186	AaHR-4_E12
AAEL005871-RA	71.4877	81.1382	79.0659	69.8673	150.247	74.8934	82.4415	79.4427	116.621	75.252	conserved hypothetical protein_E7
AAEL005884-RA	1393.88	1182.67	1508.5	2716.65	3456.69	2641.84	1330.38	1617.33	1093.46	1797.43	conserved hypothetical protein
AAEL005921-RA	530.576	599.431	782.727	1358.41	2193	2272.93	1453.01	672.537	1281.16	485.373	d-lactate dehydrognease 2,
AAEL005948-RA	105.539	195.126	226.234	644.751	2045.71	1734.69	390.411	222.072	684.975	298.921	hypothetical protein
AAEL005961-RA	8391.2	9080.37	8657.45	8274.43	13116.5	20703.1	15885.3	15521	9026.87	5794.66	actin
AAEL005964-RA	170.686	297.293	313.598	554.687	615.621	619.401	462.464	102.536	151.591	141.932	actin
AAEL005973-RA	159.382	357.636	141.677	354.01	331.953	542.435	476.946	129.305	200.918	115.59	conserved hypothetical protein
AAEL005991-RA	4101.87	3967.64	6130.3	6787.07	8692.48	6517.41	6464.1	3668.83	4190.31	2773.67	tricarboxylate transport protein
AAEL006002-RA	667.116	809.532	974.559	1882.28	2174.64	2775.54	2421.54	895.175	901.96	636.207	conserved hypothetical protein
AAEL006002-RB	728.934	874.744	1017.71	1993.21	2334.46	2912.74	2715.83	946.182	976.219	674.195	conserved hypothetical protein
AAEL006019-RA	44.4999	52.8713	67.9576	49.9151	77.8139	249.696	45.6705	45.7404	41.6999	78.3666	sodium_channel_E1-14	IH|0213|VB|AAEL008297|sodium_channel|E11-19; IH|0208|VB|AAEL006019|sodium_channel|E1-14; IH|0208|VB|AAEL006019|sodium_channel|E1-14; IH|0213|VB|AAEL008297|sodium_channel|E11-19;;
AAEL006035-RA	391.957	541.714	836.398	1167.77	1879.47	2052.09	1495.21	484.151	599.808	561.818	hypothetical protein
AAEL006069-RA	1025.83	1343.28	626.736	1211.84	2802.38	3447.96	2717.14	615.862	1805.87	716.179	conserved hypothetical protein
AAEL006092-RA	54.0763	62.8556	78.715	197.46	231.886	359.27	165.66	54.47	55.4892	59.5005	tartan
AAEL006126-RB	82.2901	8874.3	30085.7	73399.6	97684.9	120659	47063.3	523.718	61.7301	51.4325	conserved hypothetical protein
AAEL006168-RA	1274.53	2444.35	2519.59	5324.06	11114.2	15927.7	10435.6	1914.61	2886.76	970.057	serine carboxypeptidase, putative
AAEL006222-RA	46.2466	85.9041	88.969	86.5104	114.131	45.3355	82.5649	47.1636	52.1144	52.6434	talin_E3
AAEL006237-RA	107.003	73.8212	177.996	107.614	534.155	139.514	267.149	87.7411	69.9851	124.159	hypothetical protein
AAEL006242-RA	478.057	371.278	375.157	1073.89	1140.08	1046.18	410.888	401.572	420.662	269.75	beta chain spectrin
AAEL006250-RA	58.8341	79.4182	93.2995	61.0255	135.874	199.124	82.4661	61.1868	95.1118	61.7879	INSULIN_RECEPTOR_TYROSINE_KINASE_SUBSTRATE_ORF
AAEL006278-RA	71.8595	67.3618	190.578	83.5885	406.869	69.4288	188.326	58.9678	52.4347	93.6698	conserved hypothetical protein
AAEL006281-RA	250.199	237.766	360.455	366.53	642.549	258.72	427.754	166.042	116.883	260.964	glucose transporter (sugar transporter
AAEL006292-RA	132.385	103.544	91.0234	138.94	99.5689	293.895	202.32	129.512	118.467	96.012	sarcolemmal associated protein-2, putative
AAEL006343-RA	1813.04	2057.18	2228.09	2798.07	3914.6	4231.14	3558.04	2879.1	2298.35	1893.67	conserved hypothetical protein
AAEL006362-RA	3623.62	2558.82	3005.14	6376.08	7480.82	7468	3076.08	3920.72	5165.58	6125.42	mitochondrial solute carrier
AAEL006380-RA	896.864	1087.4	1454.47	6854.47	13287.7	11160.7	3316.26	784.001	4402.17	2442.98	sphingomyelin phosphodiesterase
AAEL006397-RA	298.27	249.909	624.554	1375.34	1406.7	1531.43	772.635	212.019	310.409	255.768	serine protease inhibitor
AAEL006412-RA	46.9621	47.5689	63.7226	53.495	81.3273	241.887	58.3054	50.0578	48.0086	72.8418	AA_transpt_E1-2
AAEL006455-RA	55.9408	57.3863	47.2413	43.353	62.6724	163.032	52.1074	61.4126	46.7826	82.9674	calcium-activated potassium channel
AAEL006475-RA	36.274	38.4079	39.5422	42.9279	37.5902	91.7009	39.939	40.2104	43.9108	36.8493	conserved hypothetical protein
AAEL006482-RA	52.3725	91.665	95.7342	78.187	218.914	72.7461	73.0263	52.2227	56.9189	53.5818	sugar_transporter_E4
AAEL006525-RA	701.051	593.979	788.554	1422.03	2194.4	1892.07	1011.7	818.013	1048.52	995.209	kelch repeat protein
AAEL006552-RA	114.319	134.78	194.131	288.078	371.032	549.094	371.279	191.32	181.343	132.979	wd-repeat protein
AAEL006563-RA	408.049	41659.5	144196	275331	327552	338087	167696	7886.41	2055.23	518.953	VITELLOGENIC_CARBOXYPEPTIDASE_ORF
AAEL006573-RA	672.009	878.865	720.33	894.401	1580.75	2067.41	1562.77	960.557	1171.42	551.189	conserved hypothetical protein
AAEL006581-RA	62.5592	332.734	282.323	813.022	838.861	652.801	55.0799	63.0311	84.9787	58.8333	Juvenile hormone-inducible protein, putative
AAEL006602-RB	2158.72	2869.94	5221.8	24856.7	43078.5	34874.5	13617.5	2761.79	2394.47	5950.3	hypothetical protein	AAEL006602-RA hypothetical protein
AAEL006604-RA	79.1704	106.045	134.982	106.418	403.663	317.025	94.7605	65.3311	70.0833	66.251	AA_transpt_E7
AAEL006668-RA	6896.15	11248.3	6298.4	4527.87	25807.4	47042.3	23432.7	2630.39	3707.53	4267.13	conserved hypothetical protein
AAEL006698-RA	4761.72	4525.67	4719.96	7279.4	8541.68	10140.1	7281.5	2047.53	4860.63	3526.86	60S ribosomal protein L31_E2
AAEL006766-RA	68.1371	133.88	122.645	159.542	363.094	533.938	195.529	68.5653	77.5832	89.8639	hypothetical protein_E3
AAEL006783-RA	213.24	83.6224	138.237	526.093	1536.86	2989.61	1234.03	224.143	172.121	204.171	histone h3 methyltransferase
AAEL006785-RA	3553.31	2659.27	2479.68	4991.21	5023.34	6411.5	4985.2	980.988	3617.23	932.003	60S ribosomal protein L18a_E1
AAEL006806-RA	213.155	267.098	274.82	384.215	586.495	537.047	397.104	269.641	345.065	208.924	atrial natriuretic peptide receptor
AAEL006823-RA	897.217	846.298	1033.61	1743.1	2751.69	3400.34	833.911	650.677	1354.9	2174.87	amp dependent ligase
AAEL006826-RA	58.7818	76.8877	99.4793	408.513	572.64	565.868	519.176	314.584	95.9812	50.857	conserved hypothetical protein
AAEL006832-RA	94.6477	154.234	159.214	339.2	344.38	527.406	263.74	118.877	89.8477	87.6162	frizzled, putative
AAEL006848-RA	1044.99	670.76	627.869	709.012	2199.82	2995.56	2907.33	878.025	1414.94	1554.81	conserved hypothetical protein
AAEL006860-RA	35533.7	29854.7	26339.4	33689.8	38827.7	41960.7	32862.4	18043.1	33730.4	28289	ribosomal protein S28, putative	DS|1013|AAEL006860|Ribosomal protein S28, putative|E1; DS|1013|AAEL006860|Ribosomal protein S28, putative|E1;;
AAEL006870-RA	549.434	637.175	714.592	1129.32	1563.9	1837.21	1469.21	625.782	881.348	641.065	sorting nexin
AAEL006872-RA	2344.87	2832.5	3156.12	3369.41	5292.69	6149.38	5183.9	4641.72	3524.66	2132.21	calponin/transgelin
AAEL006936-RA	1489.9	1646.37	2081.36	4367.48	6205.65	6827.09	4455.39	1324.37	1277.21	1327.82	conserved hypothetical protein	AAEL006936-RB conserved hypothetical protein
AAEL006949-RA	2033.06	2022.28	2275.49	4201.35	6401.6	6925.55	4830.74	1702.02	1631.86	1991.55	hypothetical protein
AAEL006966-RA	77.5469	84.0623	210.978	134.772	572.067	143.997	250.008	85.8545	73.6675	105.885	Vitellogenin, putative_E1
AAEL006966-RD	3488.26	3398.11	2990.72	3488.66	6005.02	8282.18	7882.05	6427.1	6449.37	5226.93	vitellogenin, putative	AAEL006966-RB vitellogenin, putative; AAEL006966-RA vitellogenin, putative; AAEL006966-RC vitellogenin, putative; AAEL006966-RE vitellogenin, putative
AAEL006979-RA	1716.9	1082.67	1448	2594.2	2502.91	3645.15	2045.98	1888.59	1869.64	2396.65	hypothetical protein
AAEL006997-RA	87.5172	158.224	171.108	393.176	488.745	741.794	354.754	73.3789	86.8324	68.8457	hypothetical protein
AAEL007019-RA	2241.54	1418.71	1554.05	2939.24	3748.8	4389.96	879.349	1804.4	1843.65	1177.65	phosphate_transporter_E1-5
AAEL007027-RA	63.3588	67.3583	58.2773	46.2159	122.533	272.776	60.4563	55.1211	49.5636	97.7677	sodium_channel_E1-4
AAEL007029-RA	261.533	402.511	484.432	733.35	1118.88	792.658	556.267	436.529	443.155	304.508	tropomodulin
AAEL007047-RA	71.8199	58.844	61.1226	143.674	771.493	896.467	218.799	87.5156	63.0799	69.5757	monocarboxylate_transporter_E1-4
AAEL007050-RA	118.991	122.758	193.481	89.2669	341.092	250.772	222.037	161.956	108.602	136.563	sugar_transporter_E4
AAEL007060-RA	53.1444	133.926	84.2998	173.587	224.201	274.192	164.751	71.2325	71.1445	116.991	lipase
AAEL007062-RA	1830.18	1128.3	1517.95	2614.56	3580.93	4553.86	4464.25	1846.14	1858.44	2088.51	hypothetical protein
AAEL007088-RA	1502.96	1879.43	2323.05	5906.59	6914.82	6202.2	2100.81	1706.5	5094.31	1955.64	ribitol kinase
AAEL007090-RA	139.363	135.302	239.705	391.798	967.77	1115.02	627.376	84.9418	60.2602	127.999	4-nitrophenylphosphatase
AAEL007106-RA	500.201	875.863	1300.68	4180.08	4437.12	4070.11	3983.12	718.405	674.439	499.051	serine protease, putative
AAEL007114-RA	1619.79	442.749	408.85	1167.74	3359.74	3347	1621.38	662.846	1125.53	689.018	conserved hypothetical protein
AAEL007136-RA	623.631	1076.99	954.423	1702.62	1790.67	1270.27	253.873	507.542	339.33	507.881	sugar_transporter_E2
AAEL007143-RA	177.685	254.291	234.89	418.76	436.034	523.351	346.776	124.733	148.353	107.982	potassium_transpt_E5
AAEL007158-RA	89.013	124.563	188.898	80.4359	371.358	54.2804	173.097	67.0564	60.3197	95.5902	nnp-1 protein (novel nuclear protein 1) (nop52)_E1
AAEL007164-RA	251.516	307.741	360.565	467.847	837.476	652.131	581.13	194.185	236.67	207.429	conserved hypothetical protein
AAEL007179-RA	489.308	317.575	413.877	1290.93	2710.6	2049.77	292.518	454.294	306.534	482.773	conserved hypothetical protein
AAEL007189-RA	739.961	476.932	534.081	927.564	1280.17	1583.21	1461.33	843.749	758.519	487.222	nocturnin
AAEL007191-RA	87.3974	188.411	175.877	252.903	242.542	292.032	142.217	71.0161	143.657	161.787	AA_transpt_E1
AAEL007202-RA	42.9609	87.2325	51.6725	58.4138	58.2134	143.856	48.4937	48.7714	45.512	68.1306	AaHR96_E2
AAEL007228-RA	542.665	668.221	762.03	1169.6	2177.06	2754.1	1780.88	707.696	743.65	570.57	Autophagy-specific protein, putative
AAEL007292-RA	1585.92	1467.85	1428.83	1757.28	2387.16	3253.67	3125.92	1864.22	1602.43	2065.15	conserved hypothetical protein
AAEL007296-RA	459.736	442.771	579.932	1117.26	1061.11	1199.34	697.138	357.737	502.568	380.273	conserved hypothetical protein
AAEL007299-RA	57.981	57.3345	87.119	117.78	251.036	190.372	133.93	71.1927	78.9071	61.9066	cadherin, putative
AAEL007300-RA	1221.18	1265.68	1213.93	1653.76	2745.95	3108.69	2563.53	1431.77	1717.35	1305.35	syntaxin binding protein-1,2,3
AAEL007336-RA	103.847	145.11	163.713	546.346	756.086	483.319	268.277	133.135	225.731	143.885	ubiquitin-conjugating enzyme E2 q	AAEL007337-RA ubiquitin-conjugating enzyme E2 q
AAEL007363-RA	404.924	452.755	450.629	533.786	753.72	848.822	738.373	358.095	466.857	299.55	leucine-rich transmembrane protein
AAEL007373-RA	51.2024	40.7468	55.5585	97.1529	180.584	277.874	55.4811	73.7685	63.985	54.7179	ammonium_transporter_E1
AAEL007397-RA	114.213	464.857	245.89	675.624	702.493	716.928	48.4616	126.665	126.061	112.14	ecdysone-induced protein 75b
AAEL007415-RA	38.7571	41.0865	40.7257	41.5513	37.97	214.611	36.0567	37.265	38.7181	39.492	multicopper oxidase
AAEL007416-RA	3837.66	5217.34	7911.96	8885.09	14975.6	15247.1	10682.9	6610.84	8715.83	6008.17	cysteine dioxygenase
AAEL007439-RA	4669.19	4863.11	5792.64	4246.3	7865.36	10376.5	9058.41	6366.04	5501.48	6582.92	myosin light chain 1,	AAEL007439-RB myosin light chain 1,
AAEL007439-RB	4669.19	4863.11	5792.64	4246.3	7865.36	10376.5	9058.41	6366.04	5501.48	6582.92	myosin light chain 1,
AAEL007459-RA	66.4382	70.9352	163.507	100.678	497.157	106.333	200.564	54.1962	56.3561	81.5615	microfibrillar-associated protein, putative
AAEL007538-RA	109.659	108.928	211.594	158.663	507.556	208.831	184.838	110.742	116.77	132.829	AaBonus_E6+E7+E8+E10
AAEL007585-RA	3916.76	100619	298500	335073	367273	375468	366982	247607	112450	88497.6	cathepsin b
AAEL007602-RA	320.019	48.4804	57.6209	145.766	1728.63	1962.81	1329.45	69.753	53.1212	44.6678	Trypsin, putative
AAEL007661-RA	260.524	260.51	329.84	383.339	604.74	639.111	314.395	221.215	216.265	253.359	rab-40
AAEL007689-RB	816.953	360.393	631.476	1630.73	3306.99	3789.67	1546.86	835.626	603.727	787.723	phospholipid-transporting atpase 1 (aminophospholipid flippase 1)		AAEL007689-RA phospholipid-transporting atpase 1 (aminophospholipid flippase 1)
AAEL007689-RB	816.953	360.393	631.476	1630.73	3306.99	3789.67	1546.86	835.626	603.727	787.723	phospholipid-transporting atpase 1 (aminophospholipid flippase 1)
AAEL007690-RA	51.2278	55.6756	49.9956	90.0938	67.7589	139.686	49.2108	58.0759	59.6674	50.2371	AaegRaptor_E3
AAEL007691-RA	129.277	488.772	342.484	466.46	563.982	659.715	320.175	219.662	373.474	129.139	Organic_transpt_E1
AAEL007699-RA	2292.32	2865.76	3282.65	5527.91	6149.87	6629.2	4362.74	1303.43	2876.52	1681.36	60S ribosomal protein L9_E2
AAEL007715-RA	58.5192	82.4752	89.0514	70.0584	736.261	84.9382	38.7106	44.6292	46.4469	43.5913	60S ribosomal protein L21_E1
AAEL007721-RA	55.9729	45.4269	75.075	157.338	228.45	362.01	160.745	51.1452	41.4463	50.978	conserved hypothetical protein
AAEL007731-RA	688.435	751.259	852.557	974.282	1435.81	1685.34	1565.65	739.862	902.296	597.722	Pep12p, putative_E3
AAEL007734-RA	165.948	185.135	134.62	230.086	192.636	318.254	170.998	76.6006	89.4264	66.8193	conserved hypothetical protein
AAEL007743-RA	66.0035	189.684	110.057	186.526	301.958	465.783	244.203	69.5428	79.9686	71.0447	hypothetical protein
AAEL007744-RA	361.365	591.187	650.954	1006.36	1230.15	1501.94	1004.6	246.889	368.101	605.683	hypothetical protein
AAEL007763-RB	644.795	816.696	1098.48	1857.22	3140.63	3169.34	2076.83	646.66	777.777	1009.1	vacuole membrane protein
AAEL007816-RA	1593.11	2020.44	4177.59	6517.15	6287.23	7460.63	3211.55	2365.49	3488.78	2031.32	cytochrome P450
AAEL007826-RA	434.67	569.143	525.952	660.431	1659.74	1946.14	1381.46	1042.55	699.09	394.451	cgmp-dependent protein kinase
AAEL007867-RA	63.0014	114.697	99.5609	132.746	254.921	595.816	245.063	63.6792	63.779	83.6321	hypothetical protein
AAEL007940-RA	100.877	182.268	194.175	317.437	237.032	404.486	245.495	91.4891	89.302	234.751	hypothetical protein
AAEL007966-RA	145.168	160.538	192.662	144.696	1100.92	1498.16	283.766	85.8629	78.9845	173.357	glutamate receptor, ionotropic ampa, subunit 1, 2, 3,
AAEL008030-RA	42.2891	46.3688	59.9214	106.726	158.426	150.886	94.2289	43.7619	43.0781	41.5816	fibrinogen and fibronectin
AAEL008043-RA	66.5766	50.7614	99.7052	43.1236	138.449	38.8225	51.6836	59.4058	45.3524	60.559	AaNR_E4
AAEL008105-RB	338.728	482.218	751.386	1893.61	1979.96	1350.67	246.352	351.065	272.011	284.647	glutamate cysteine ligase	AAEL008105-RA glutamate cysteine ligase
AAEL008119-RA	1773.71	1197.33	1647.58	3034.19	2756.97	3952.81	2229.84	2033.98	1934.12	2324.53	hypothetical protein
AAEL008129-RA	47.9766	53.1293	56.0465	79.5876	178.662	271.544	115.53	47.4877	49.527	73.1011	conserved hypothetical protein
AAEL008175-RA	48.0634	78.7283	58.0626	44.6525	76.9423	174.235	40.2804	45.611	46.4806	77.9397	Mitochondrial ribosomal protein, L44, putative_E1
AAEL008198-RA	1019.06	664.714	696.687	1106.72	2340.35	3313.91	2177.63	936.619	927.895	689.773	EGF repeat molecule, putative
AAEL008227-RA	1234.22	1136.7	1158.42	1633.37	2423.88	2969.9	2115.69	1069.59	1693.32	776.537	short-chain dehydrogenase
AAEL008240-RA	38.4168	49.4719	36.0291	42.1881	36.4636	163.82	38.5945	47.1083	41.6176	34.1504	conserved hypothetical protein
AAEL008290-RA	89.5975	57.0093	70.4309	75.1217	179.666	316.974	130.197	49.9848	49.3646	52.7389	conserved hypothetical protein
AAEL008294-RA	190.025	140.403	208.495	493.702	973.091	1537.99	911.383	68.6976	70.3277	59.3774	pupal cuticle protein 78E, putative
AAEL008296-RA	93.5908	134.281	172.518	168.399	264.607	273.373	221.872	73.2971	86.6578	79.3394	neuropeptide y receptor (npy-r) (pr4 receptor)
AAEL008303-RA	330.848	519.823	557.799	993.125	1464.59	2005.38	1301	546.932	680.047	401.676	calponin/transgelin
AAEL008310-RA	120.609	270.777	369.32	637.057	1180.52	1180.86	688.72	93.2123	108.861	109.218	hypothetical protein
AAEL008347-RA	1090.34	545.507	590.643	732.759	1454.47	2752.1	2522.14	586.047	1244.27	808.747	AA_transpt_E4-5
AAEL008381-RA	252.676	110.959	241.679	128.033	486.606	76.3944	292.897	247.471	113.152	225.402	oligopeptide_transpt_E1	IH|0692|VB|AAEL008381|oligopeptide_transpt|E1;;
AAEL008396-RA	148.293	85.9006	160.052	88.4181	356.564	93.1741	178.191	145.944	85.4289	141.557	oligopeptide_transpt_E2
AAEL008424-RA	49.2216	73.0485	56.5932	56.5401	120.138	357.231	49.1081	58.4624	54.9215	106.85	sodium_channel_E1-10
AAEL008426-RA	43.2255	72.6897	88.5103	42.5903	197.282	45.1132	56.8062	63.4983	90.333	44.0264	AaBrC_com1+com2
AAEL008426-RC	58.2482	55.6146	68.102	153.627	190.18	327.512	249.111	42.6819	44.2534	59.8086	AaBrC-Z4_Z4
AAEL008455-RA	61.9849	133.176	170.486	138.898	322.105	112.366	142.053	66.4045	71.6172	67.1195	conserved hypothetical protein
AAEL008471-RA	767.928	680.926	753.356	1435.69	2310.01	2742.49	1092.9	304.697	803.311	438.331	hypothetical protein
AAEL008478-RA	1273.76	3093.65	4911.18	12811.7	22320.3	26989.7	20399.2	5848.54	3831.5	1765.88	conserved hypothetical protein
AAEL008489-RA	1129.59	1247.41	892.439	952.1	1660.08	2066.74	1838.76	825.696	968.435	826.96	calcyphosine/tpp
AAEL008525-RA	536.339	422.81	478.516	718.793	876.525	1197.75	688.967	433.567	387.545	446.155	conserved hypothetical protein
AAEL008591-RA	600.205	404.928	397.683	542.706	911.975	1252.82	1123.64	513.555	652.877	634.424	zinc finger protein, putative
AAEL008603-RA	70.4896	83.598	189.833	166.159	636.42	681.72	380.886	58.3645	52.5678	83.2027	conserved hypothetical protein
AAEL008612-RA	54.5175	71.5334	93.3563	237.288	436.592	552.5	313.067	57.1707	58.0651	66.0544	hypothetical protein
AAEL008629-RA	548.896	373.041	637.162	1345.68	2762.2	4275.15	833.193	509.826	1305.27	710.255	ABC_transporter_E1+E2+E3+E4
AAEL008635-RA	95.5099	104.697	290.745	635.56	1558.65	1938.6	799.558	190.374	591.433	143.871	abc transporter_E1
AAEL008642-RA	1062.77	1275.83	1447.12	1946.34	2066.57	1784.69	1530.31	1103.4	992.274	971.87	conserved hypothetical protein
AAEL008672-RA	127.578	155.269	199.284	567.183	904.097	1202.5	637.234	288.05	494.923	146.483	ABC_transporter_E6+E7+E8
AAEL008679-RB	375.282	487.813	430.002	594.781	846.856	809.962	705.027	467.4	377.403	372.758	conserved hypothetical protein	AAEL008679-RC conserved hypothetical protein; AAEL008679-RA conserved hypothetical protein;;
AAEL008723-RA	6362.29	8595.36	10228	10510	13655	14970.5	12985.2	9194.53	7819.02	4906.76	conserved hypothetical protein
AAEL008723-RB	8830.5	9398.44	10730.7	10566.1	15598.7	18813.9	16491.3	12223.2	10592.9	7548.01	conserved hypothetical protein
AAEL008804-RA	432.314	759.483	846.934	1553.06	2748.2	2786.23	1384.81	761.207	747.353	462.884	hypothetical protein
AAEL008819-RA	769.489	1155.41	1230.2	2638.6	4656.11	4788.75	2792.27	1367.6	1504.53	714.637	hypothetical protein
AAEL008876-RA	344.276	482.294	547.949	814.504	1366.51	1534.22	1070.34	323.104	275.16	355.558	deoxyribonuclease I, putative
AAEL008896-RA	254.831	318.981	330.678	420.429	455.524	555.073	406.676	237.46	210.249	238.822	hypothetical protein
AAEL008901-RA	462.035	567.699	447.297	496.236	1005.71	1101.15	1007.7	361.267	383.723	258.313	conserved hypothetical protein
AAEL008913-RA	67.6928	149.479	127.985	205.853	150.869	289.486	92.3146	65.4901	118.026	142.76	AA_transpt_E1
AAEL008924-RA	815.101	585.964	829.664	1514.16	3241.05	4435.71	1647.67	1374.76	1553.04	1654.82	cysteine-rich hydrophobic domain 2 (chic1)
AAEL008955-RA	51.9017	87.2199	217.018	601.321	1270.73	1692.17	654.193	53.3592	50.3013	44.1044	conserved hypothetical protein
AAEL008959-RA	1238.77	1663.72	1970.76	2207.44	2561.73	2584.38	2390.11	1897.56	1779.02	1794.03	ras-related protein Rab-39B, putative
AAEL009007-RA	38.3919	43.3594	60.9756	45.3631	80.535	39.3854	46.8254	41.9318	39.3922	42.0422	conserved hypothetical protein
AAEL009032-RA	382.398	468.987	491.481	769.391	1426.23	1364.45	1053.72	557.726	790.823	462.368	conserved hypothetical protein
AAEL009042-RA	1343.21	1557.46	2354.1	2679.12	3214.55	3725.54	3369.95	1123.01	1080.55	1026.02	ubiquitin fusion degradaton protein	AAEL009042-RB ubiquitin fusion degradaton protein
AAEL009091-RA	40.9178	43.7779	69.3363	125.133	386.57	787.89	278.724	41.3472	38.1877	43.0476	hypothetical protein
AAEL009111-RA	46.0734	54.1155	48.6247	80.2589	323.968	346.652	63.3408	52.7945	60.1876	95.8257	sphingomyelin phosphodiesterase
AAEL009125-RA	274.233	366.209	375.84	549.997	753.358	975.501	979.602	454.407	560.486	355.853	cytochrome P450	AAEL009125-RB cytochrome P450
AAEL009161-RA	56.878	48.9885	64.505	149.746	216.107	234.125	127.949	85.9735	91.239	91.4707	breast carcinoma amplified sequence
AAEL009172-RA	1611.58	1690.74	2069.15	2846.61	3752.5	3763.38	3273.77	1745.59	2323.47	1748.22	ubiquitin ligase E3 alpha
AAEL009185-RA	3142.64	2849.33	3307.7	5303.98	6817.31	8321.07	5869.81	5621.98	4985.68	6279.91	arginine or creatine kinase
AAEL009214-RA	42534.8	34225.5	76855	152214	164136	125697	33646.5	110745	85597.3	84932.4	AaegDBI_ORF	DS|0052|VB|AAEL009214|AaegDBI|E3; DS|0052|VB|AAEL009214|AaegDBI|E3; DS|0052|VB|AAEL009214|AaegDBI|E3; DS|0050|VB|AAEL009214|AaegDBI|ORF;;
AAEL009232-RA	106.659	192.249	165.733	373.08	762.891	847.717	676.535	209.096	160.87	275.601	long-chain-fatty-acid coa ligase
AAEL009246-RA	2158.51	1969.69	2984.21	7407.63	8806.69	7085.87	4321.29	3456.52	5226.65	2873.55	glycoside hydrolases
AAEL009291-RA	7268.14	7831.1	11254.6	32798.6	44739.4	39446.3	37347.5	9999.44	13245.9	9283.64	retinoid-inducible serine carboxypeptidase (serine carboxypeptidase
AAEL009293-RA	456.218	471.007	534.069	591.434	831.108	1184.4	861.112	356.137	327.889	429.346	hypothetical protein
AAEL009358-RA	366.95	623.876	613.65	959.288	937.211	1119.46	631.9	166.334	321.554	204.133	AA_transpt_E3
AAEL009362-RA	2953.44	1259.73	1371.42	1825.9	4698.24	7896.56	7436.38	4284.83	2584.96	4824.47	cationic amino acid transporter
AAEL009372-RA	2401.44	1661.92	2245.3	4097.71	4641.2	3777.16	1759.43	2209.17	3484.47	2382.14	conserved hypothetical protein	AAEL009372-RB conserved hypothetical protein
AAEL009398-RA	1275.36	1269.44	1298.17	1517.99	2620.1	2590.52	2396.95	2282.63	2005.08	2117.82	Pep12p, putative
AAEL009403-RA	82.3987	140.565	210.404	313.763	492.331	582.457	273.238	64.2902	65.8124	58.0363	hypothetical protein
AAEL009407-RA	497.897	457.281	549.604	818.694	1566.88	1644.74	604.308	794.169	553.377	863.398	conserved hypothetical protein
AAEL009432-RA	176.944	243.057	288.973	678.901	1670.66	2104.59	540.327	242.449	221.135	166.308	cd36 antigen
AAEL009464-RA	57.2382	56.4844	55.5898	164.964	228.818	190.361	57.9557	54.5262	69.5653	69.0856	knolle, putative
AAEL009466-RA	177.823	212.77	144.763	138.475	225.66	606.491	321.088	200.787	328.628	266.406	protein kinase c
AAEL009473-RA	81.134	174.572	153.657	287.649	309.805	308.304	178.763	70.4551	80.5362	84.1468	conserved hypothetical protein
AAEL009480-RA	84.3257	81.781	87.2072	206.522	406.723	691.205	326.001	86.913	96.4112	66.2255	hypothetical protein
AAEL009556-RA	57.8232	69.2222	85.7207	114.064	107.995	177.202	100.673	101.944	72.5808	59.1759	Niemann-Pick Type C-2, putative
AAEL009573-RA	284.16	110.365	123.973	321.367	393.135	572.833	214.226	92.4888	143.895	102.774	5-hydroxytryptamine receptor 1
AAEL009583-RA	127.316	178.191	133.719	232.021	242.315	235.714	220.774	141.214	111.195	76.7303	filamin, putative
AAEL009588-RA	52.3868	39.5413	43.94	98.9476	173.359	225.78	69.155	44.3864	44.0388	41.6036	AaHR3_E5+E6+E7+E8
AAEL009619-RA	38.7995	40.1459	55.7859	39.7695	71.1818	40.9244	47.8301	40.9074	59.2552	38.0543	potassium_transpt_E6
AAEL009683-RA	155.071	176.191	254.569	480.898	642.855	877.004	452.306	118.526	141.136	145.836	hypothetical protein
AAEL009694-RA	60.9154	55.3687	50.9574	51.0039	286.495	78.1563	63.8544	39.3188	38.2616	41.6206	hypothetical protein
AAEL009712-RA	798.806	927.771	652.005	813.791	1814.03	2196.45	1726.47	738.76	959.86	803.363	conserved hypothetical protein
AAEL009745-RA	61.2905	80.7866	104.509	89.9114	219.407	47.0071	188.691	55.4308	55.4658	70.6109	nitric oxide synthase
AAEL009747-RA	2631.27	3006.63	3547.91	6296.51	7421.22	8630.37	5592.43	1349.39	3085.41	1823.42	40S ribosomal protein S18_E1
AAEL009782-RA	1045	371.101	487.07	919.444	2426.43	2874.49	2389.63	1032.87	1894	1696.56	brain chitinase and chia
AAEL009803-RA	171.931	188.083	162.484	263.266	297.597	574.726	461.42	166.295	166.565	164.181	phaF protein, putative
AAEL009814-RA	580.44	484.393	577.177	960.33	1468.88	1681.46	1597.62	722.145	643.185	643.157	autophagy protein_E1
AAEL009820-RA	93.7494	74.265	222.919	158.672	709.072	252.454	323.18	60.9329	58.2311	106.075	metalloproteinase, putative
AAEL009823-RA	43.86	52.7354	81.9835	59.8896	107.594	46.4421	63.2882	52.7908	54.1143	61.3632	hypothetical protein_E1
AAEL009857-RA	52.4304	75.2705	54.861	59.9661	125.919	307.862	214.516	74.6606	65.1883	102.102	AaegStart1_E1
AAEL009874-RA	445.128	365.378	335.146	392.642	743.502	930.955	772.67	553.083	584.781	501.159	conserved hypothetical protein
AAEL009921-RA	103.292	236.729	214.991	277.342	328.566	395.622	282.572	117.37	109.335	100.175	zinc finger protein
AAEL009937-RB	192.34	176.275	189.173	202.908	212.683	772.623	179.959	179.207	150.494	117.441	calcium/calmodulin-dependent serine protein kinase membrane-associated guanylate kinase (cask)
AAEL009937-RB	192.34	176.275	189.173	202.908	212.683	772.623	179.959	179.207	150.494	117.441	calcium/calmodulin-dependent serine protein kinase membrane-associated guanylate kinase (cask)
AAEL009938-RA	76.033	128.178	167.122	472.783	825.116	820.117	282.39	69.7161	68.3975	91.0557	conserved hypothetical protein
AAEL010009-RA	2065.3	1450.52	1082.12	1843.28	3428.08	4615.8	1904.94	1682.12	2207.52	1694.71	conserved hypothetical protein
AAEL010053-RA	912.81	799.742	1090.3	1595.72	1659.54	2248.61	1997.55	841.393	1101.78	1302.02	conserved hypothetical protein
AAEL010068-RA	52.6854	81.4213	86.7927	138.499	264.245	355.823	122.642	74.6543	176.851	104.255	hypothetical protein
AAEL010103-RA	41.5363	47.2712	56.95	110.028	234.43	305.489	101.471	41.4882	48.7388	47.434	fibrinogen and fibronectin	AAEL013506-RA fibrinogen and fibronectin
AAEL010106-RA	56.8533	65.5548	108.002	68.6783	151.21	48.0977	60.3952	55.6847	54.0268	60.3537	norepinephrine_transpt_E4
AAEL010111-RA	298.425	341.732	279.44	274.23	306.622	543.695	535.042	202.904	226.956	172.522	leucine-rich transmembrane protein
AAEL010123-RA	414.141	401.417	433.087	426.948	1516.11	2219.69	2195.9	518.371	706.19	366.259	nucleoside_transporter_E2
AAEL010125-RA	6715.29	5906.88	8068.63	20434.1	31837.6	28803.7	17720.3	7689.83	12335	9743.77	mitotic protein phosphatase 1 regulator, putative
AAEL010127-RA	246.091	231.026	213.288	737.047	1853.35	1199.42	567.078	147.455	116.281	86.0452	pupal cuticle protein 78E, putative
AAEL010148-RA	1304.54	936.486	816.752	817.206	2613.48	3869.48	3796.45	1737.39	2750.58	1879.42	sodium_channel_E2-5
AAEL010182-RA	771.017	1667.75	1754.88	1759.73	2167.16	2311.27	2318.09	1195.69	952.371	984.297	conserved hypothetical protein
AAEL010204-RA	3681.3	17846.9	16151.6	28505.6	51329.1	42624.5	23619	6756.95	5747.06	6219.07	dihydropyrimidine dehydrogenase
AAEL010222-RA	392.503	909.672	701.788	866.887	823.916	938.738	926.992	392.109	724.64	349.091	GATA_A_E2-8
AAEL010288-RA	69.275	54.9793	62.8035	67.0253	365.565	65.6376	121.187	75.687	78.1774	70.2435	Carboxylase:pyruvate/acetyl-coa/propionyl-coa B_ORF
AAEL010325-RA	54.3435	52.9258	64.0218	76.5909	105.587	86.8122	75.1808	51.7578	56.4287	45.0736	hypothetical protein
AAEL010347-RA	145.307	175.496	188.006	244.71	321.104	532.251	240.181	92.0332	96.3829	118.466	hypothetical protein
AAEL010355-RA	872.875	854.252	972.72	1264.34	1911.06	2587.4	1165.12	598.607	574.175	689.555	conserved hypothetical protein
AAEL010358-RA	472.811	644.415	870.496	1451.51	2051.07	1691.23	693.749	287.048	363.392	485.027	hypothetical protein
AAEL010392-RA	263.959	351.098	378.168	662.64	802.788	1195.95	800.32	194.808	210.175	189.172	hypothetical protein
AAEL010404-RA	281.225	384.609	518.985	695.855	1560.82	2126.13	1494.75	386.621	399.089	280.04	conserved hypothetical protein
AAEL010406-RA	298.857	416.527	415.062	1140.18	1512.12	1180.78	702.668	273.006	317.961	370.912	hypothetical protein
AAEL010411-RA	374.31	277.011	317.81	393.414	503.566	732.972	461.589	431.254	463.373	499.714	dual specificity protein phosphatase
AAEL010415-RA	56.3928	55.9774	70.4029	85.8434	70.9942	156.897	58.5313	48.8754	50.6808	49.4026	Odorant receptor 9a, putative
AAEL010427-RA	767.516	852.462	1018.66	1216.12	1366.72	1591.05	1521.11	1039.42	845.674	1097.36	beclin
AAEL010434-RA	309.606	65826.5	107337	157284	182667	239158	132718	5275.36	213.287	117.283	VITELLOGENIN_A1_PRECURSOR_ORF
AAEL010487-RA	3139.21	3288.53	3284.01	5807.11	7281.96	9153.54	7072.28	3590.4	4147.47	2802.98	conserved hypothetical protein
AAEL010506-RA	540.876	663.54	531.833	726.443	1136.53	1257.44	758.64	515.258	456.766	431.221	gtp-binding protein alpha subunit, gna
AAEL010509-RA	135.727	143.316	126.15	143.424	190.819	469.837	141.685	126.794	137.815	86.6303	bridging integrator
AAEL010536-RA	45.4285	57.8498	51.472	51.184	96.3226	126.811	41.4146	48.7441	49.0195	81.3289	AA_transpt_E1
AAEL010555-RA	1629.01	1659.81	2353.28	11144.8	14394.8	16566.9	7712.89	1401.21	3885.28	2414.24	sterol regulatory element-binding protein
AAEL010565-RA	855.139	1151.16	1230.88	1850.83	2508.33	3196.21	2102.63	551.801	865.46	1795.84	AaegFOXK2_E2
AAEL010582-RA	716.827	1197.76	2469.41	3599.4	4837.36	3442.57	2342.32	1792.02	1824.66	1210.31	glutathione-s-transferase theta, gst
AAEL010634-RA	6337.54	2944.06	5448.04	9344.55	14325.3	19654.4	16356.8	2134.09	5148.76	785.916	hypothetical protein
AAEL010656-RA	137.784	70.2167	161.47	399.668	264.461	638.068	112.374	51.3002	56.063	42.7182	conserved hypothetical protein
AAEL010681-RA	68.7685	51.3449	63.8964	106.307	115.954	193.389	120.435	82.1665	90.4179	51.0573	AA_transpt_E1-4	IH|0221|VB|AAEL010681|sodium_channel|E1-5; IH|0075|VB|AAEL010681|AA_transpt|E1-4; IH|0221|VB|AAEL010681|sodium_channel|E1-5
AAEL010719-RA	123.07	98.3631	101.511	191.692	265.149	464.306	119.372	94.4023	77.8493	111.642	ecdysone receptor A isoform, putative
AAEL010767-RA	64.4438	73.5883	117.548	252.09	699.26	973.709	393.87	62.6913	62.7116	58.7862	conserved hypothetical protein
AAEL010804-RA	168.215	180.188	82.8723	356.357	848.066	498.817	140.097	205.605	168.467	128.862	calcium/calmodulin-dependent protein kinase kinase
AAEL010814-RA	91.0721	93.0331	274.983	116.379	469.232	131.064	195.094	82.1559	69.3045	98.2044	Isocitrate dehydrogenase B_ORF
AAEL010815-RA	34.62	40.0469	38.5816	37.6279	46.768	60.8301	40.0604	35.5094	36.2633	54.5387	conserved hypothetical protein_E9
AAEL010819-RA	3702.94	3184.93	3555.11	5673.84	7722.95	6374.32	3227.69	2105.74	3470.6	2742.18	Vacuolar ATP synthase subunit H		AAEL010819-RB Vacuolar ATP synthase subunit H
AAEL010838-RA	557.206	776.192	747.458	985.357	1365.81	1729.29	1575.16	674.358	635.094	744.977	conserved hypothetical protein	AAEL012375-RA conserved hypothetical protein
AAEL010850-RA	910.587	845.943	1000.2	1718.18	3116.68	5396.25	5736.11	2423.22	1109.44	1011.04	troponin i
AAEL010850-RI	164.748	193.688	210.24	259.205	359.43	541.071	459.072	114.103	94.0737	87.6612	troponin i	AAEL010850-RD troponin i
AAEL010866-RA	437.404	480.481	534.422	1171.29	2729.05	2656.27	1924.31	450.186	654.669	534.948	serine protease
AAEL010868-RA	48.1534	43.1844	74.7616	51.8901	96.6494	48.6158	57.9915	54.5596	57.7202	61.3133	sugar_transporter_E4
AAEL010891-RA	691.972	747.077	830.446	1185.36	1503.99	1207.24	1205.29	700.663	1089.78	1195.18	conserved hypothetical protein
AAEL010912-RA	1193.82	652.204	835.939	1212.1	2366.17	3412.04	2427.16	2034.4	1384.32	1645.46	dipeptidyl-peptidase
AAEL010917-RA	97.475	69.451	99.3615	89.3142	205.849	49.0706	144.822	71.6557	51.0575	116.049	Organic_transpt_E2
AAEL010921-RA	229.583	63.5046	154.009	74.2985	323.267	50.9499	236.293	98.8182	47.5934	173.853	Organic_transpt_E1
AAEL010930-RA	129.357	51.1213	142.959	765.932	2057.02	1352.07	66.5234	110.597	109.815	112.675	l-asparaginase		AAEL010930-RB l-asparaginase
AAEL010946-RA	81.7744	117.976	235.082	530.296	592.03	374.322	72.6535	71.154	75.3585	66.6151	AaegCYP314a1_E2
AAEL010991-RA	1459.12	1060.72	1020.01	2822.12	3926.99	3954.66	2928.94	1912.09	2445.6	1159.76	long-chain-fatty-acid coa ligase
AAEL011032-RA	267.222	216.027	214.645	381.217	449.989	646.622	319.29	224.654	285.77	314.57	conserved hypothetical protein
AAEL011078-RA	274.736	383.62	211.085	397.138	646.948	877.604	640.164	227.202	260.292	160.719	conserved hypothetical protein
AAEL011088-RA	332.136	728.895	925.714	681.393	945.978	1254.85	1137.75	372.116	264.292	378.192	conserved hypothetical protein
AAEL011100-RA	285.24	504.097	610.483	833.367	1076.37	783.784	691.31	416.148	900.856	543.605	hypothetical protein
AAEL011102-RA	3026.18	3084.87	2745.51	5249.63	7837.38	8709.96	6115.55	3688.58	5063.24	5426.85	lysosomal-associated transmembrane protein
AAEL011138-RA	96.9762	726.19	4221.98	32053.5	60611.3	93367.1	49677.4	127.318	112.363	110.078	hypothetical protein
AAEL011161-RB	897.844	699.543	1063.52	1579.1	2622.73	2097.9	1162.33	972.14	1428.36	1213.13	conserved hypothetical protein
AAEL011177-RA	311.62	478.202	512.801	939.592	1206.03	1838.79	1067.53	268.684	286.164	244.358	conserved hypothetical protein
AAEL011202-RA	51.0959	62.2619	102.818	217.303	490.679	689.81	337.191	59.1174	58.35	48.4374	bhlhzip transcription factor bigmax_E1
AAEL011204-RA	157.906	226.846	146.33	220.669	369.623	440.327	247.288	173.786	155.63	187.41	xenotropic and polytropic murine leukemia virus receptor xpr1
AAEL011206-RA	7481.46	4781.03	6145.85	12515.2	19793.6	22905.5	11695.6	6136.3	6552.09	11263.2	aminoacylase, putative
AAEL011206-RB	3123.09	2949.2	3193.76	7341.07	11905.5	13023.1	6558.91	2694.02	3614.58	4550.82	aminoacylase, putative
AAEL011230-RA	58.5497	85.1695	80.4393	135.393	183.474	176.864	129.517	60.8624	72.4094	77.2778	chymotrypsin, putative
AAEL011234-RA	86.8608	104.64	149.585	125.68	283.999	67.1864	124.998	85.7601	78.7856	86.8751	reticulon/nogo receptor
AAEL011242-RA	132.306	123.54	120.142	66.9581	140.214	245.456	75.3739	118.106	103.921	130.478	udp-glucose 6-dehydrogenase_E2
AAEL011264-RA	2152.28	2581.32	3171.65	8147.57	11590.2	13062.5	6118.16	2953.84	2979.07	2647.21	phosphatidylethanolamine-binding protein
AAEL011265-RA	256.136	364.813	408.458	582.067	840.953	865.834	435.401	203.227	248.125	175.538	abc transporter
AAEL011266-RA	54.1442	46.0287	54.3404	100.966	151.761	313.117	122.405	49.4429	50.8193	44.8292	hypothetical protein
AAEL011272-RA	1957.7	2631.95	2555.11	2879.57	3673.51	4053.84	3120.84	2474.87	2915.33	2833.73	nmda receptor glutamate-binding chain
AAEL011305-RA	49.4207	63.6514	50.0524	63.2499	53.6302	180.026	82.3499	50.3251	46.9349	47.5414	hypothetical protein
AAEL011347-RA	2896.33	1909.27	1464.29	2686.64	4492.81	5914.73	2614.48	2441.62	2891.09	2453.5	conserved hypothetical protein
AAEL011394-RA	956.351	1031.8	1229.13	1732.81	2925.44	3716.32	1096.89	903.979	893.41	828.067	conserved hypothetical protein
AAEL011423-RA	168.966	129.654	186.268	161.122	414.536	263.893	165.512	168.175	121.837	220.009	sugar_transporter_E2
AAEL011434-RA	351.349	600.367	452.557	589.44	923.548	906.382	945.787	377.065	465.7	326.304	hypothetical protein	SGR|0075|VB|AAEL011434|ERK|ORF; SGR|0075|VB|AAEL011434|ERK|ORF; SGR|0075|VB|AAEL011434|ERK|ORF; SGR|0075|VB|AAEL011434|ERK|ORF; SGR|0075|VB|AAEL011434|ERK|ORF;;
AAEL011466-RA	495.697	468.902	805.733	1287.71	1738.45	1763.12	1438.1	405.834	400.944	565.072	conserved hypothetical protein
AAEL011469-RA	67.5898	73.5475	142.987	78.9731	312.674	50.2004	117.053	88.2355	73.2518	105.255	conserved hypothetical protein
AAEL011526-RA	414.193	519.422	645.662	1440.45	1746.27	1371.29	790.929	496.722	475.761	329.87	conserved hypothetical protein
AAEL011547-RA	36.9689	52.255	49.0183	59.6071	88.5958	348.948	56.3499	57.5202	49.3573	53.0197	METALLO_ENDOPROTEASES_ORF
AAEL011575-RA	212.655	128.41	166.713	358.005	809.366	901.164	547.044	462.455	394.507	542.148	conserved hypothetical protein
AAEL011604-RA	1149.92	1353.65	1242.19	1523.47	1996.05	2767.97	1434.67	1037.83	897.784	444.204	perlecan
AAEL011609-RA	71.0624	71.9938	51.9241	58.1054	57.4559	253.468	81.2692	57.969	68.8722	55.0585	conserved hypothetical protein
AAEL011610-RA	3648.67	4208.9	3930.8	8233.78	9129.1	9407.58	4407.35	2539.23	2973.51	2410.69	galactose-specific C-type lectin, putative
AAEL011620-RA	160.25	133.609	122.532	240.989	287.101	412.016	234.304	91.7256	73.7323	57.9548	conserved hypothetical protein
AAEL011639-RA	3491.51	4179.33	4250.16	6947.14	10116.6	10122.2	6012.01	4515.9	7324.19	4396.55	WAP four-disulfide core domain protein 2 precursor, putative
AAEL011676-RA	1666.52	1146.79	1357.83	2266.92	2963.47	2790.03	1031.72	835.593	2442.95	1784.02	amp dependent coa ligase
AAEL011683-RA	831.091	1478.45	1874.65	1799.71	2141.39	1804.7	1838.33	960.48	1649.35	766.606	hypothetical protein	AAEL011683-RB hypothetical protein
AAEL011696-RA	67.712	118.498	59.9514	71.3876	560.726	121.978	41.5678	55.2258	61.2735	70.3992	conserved hypothetical protein_E1
AAEL011764-RA	669.617	995.989	496.75	1148.47	2640.78	2949.55	1881.56	261.665	438.583	209.045	prophenoloxidase
AAEL011775-RA	46.6703	50.4582	46.7907	45.5249	53.4425	200.34	48.9641	42.571	46.5154	52.9957	hypothetical protein
AAEL011776-RA	1376.82	1325.44	1515.95	1597.53	2483.47	3291.24	2516.18	1973.45	1750.51	1834.24	soluble nsf attachment protein (snap)
AAEL011835-RA	41.3007	47.0938	79.2797	61.2942	75.6184	123.014	75.4302	42.756	43.0454	48.798	potassium_transpt_E3
AAEL011845-RA	57.8343	76.9875	127.396	380.85	815.756	1297.65	473.253	59.4121	54.0727	48.2336	hypothetical protein
AAEL011885-RA	78.6088	60.8123	118.755	73.2002	248.587	272.349	99.63	147.841	54.881	67.7578	monocarboxylate_transporter_E7
AAEL011957-RA	63.5227	131.768	150.906	249.841	498.441	529.276	196.446	75.376	60.9905	69.6122	elongase, putative
AAEL011962-RA	883.092	1709.45	3405.45	9259.96	11095.6	10087.6	4266.71	1635.14	3886.6	2078.04	conserved hypothetical protein	AAEL011962-RB conserved hypothetical protein; AAEL011962-RC conserved hypothetical protein;;
AAEL011979-RA	1823.22	2069.87	4182.7	5793.78	6612.23	7649.32	2033.85	1630.14	1954.01	2691.62	calmodulin
AAEL011981-RA	69.9939	155.333	157.787	183.943	361.862	404.523	357.545	86.1061	84.4858	83.0783	glutamate decarboxylase
AAEL011995-RA	738.379	946.183	862.995	1120.42	1470.14	1835.18	1118.86	615.776	458.986	616.039	conserved hypothetical protein
AAEL012039-RA	145.133	170.783	138.497	163.319	143.816	296.846	142.873	128.403	165.341	112.972	zinc finger protein
AAEL012041-RA	92.2514	104.815	86.9196	69.7268	158.225	507.411	184.13	85.3963	76.8834	107.005	sulphatetransporter_E1+E2+E3
AAEL012064-RA	2923.24	2249.08	2399.75	3857.28	5338.64	5392.65	4232.27	2009.64	2176.68	1819.56	Niemann-Pick Type C-2, putative
AAEL012085-RA	223.279	301.464	341.372	723.778	996.018	928.448	374.631	231.331	225.186	195.184	hypothetical protein
AAEL012088-RA	39.675	46.6754	41.1271	39.0588	45.3401	84.7706	39.2801	37.8484	39.6797	39.2278	conserved hypothetical protein
AAEL012101-RA	97.7018	172.083	189.281	403.105	426.327	523.095	212.949	84.7304	82.3582	72.0949	tubulin alpha chain
AAEL012124-RA	79.2482	50.5314	50.6938	72.9511	53.8259	198.153	52.5795	71.2857	48.8656	67.1531	conserved hypothetical protein
AAEL012131-RA	167.716	356.879	359.769	257.618	475.99	255.05	257.809	163.789	282.352	177.457	AA_transpt_slif_E4
AAEL012136-RA	94.7754	125.301	141.994	58.591	341.987	168.371	126.011	89.4791	79.3611	74.0215	allergen, putative	DS|0421|VB|AAEL012136|allergen, putative|E6; DS|0421|VB|AAEL012136|allergen, putative|E6;;
AAEL012141-RA	344.996	609.486	457.989	736.21	1504.91	2122.68	993.523	516.865	490.181	390.797	acetylcholinesterase
AAEL012192-RA	62.4772	104.313	103.025	181.171	136.712	237.949	57.3947	58.7191	50.1806	62.6218	atp-binding cassette transporter
AAEL012197-RA	424.362	339.057	642.363	1060.46	1520.29	1553.08	1108.82	348.753	329.46	458.882	conserved hypothetical protein
AAEL012205-RA	441.719	368.589	437.169	537.675	761.593	829.716	648.441	365.041	390.794	421.775	conserved hypothetical protein
AAEL012264-RA	43.245	36.9751	47.2199	46.0023	72.0394	185.346	36.7288	41.6892	37.5073	41.5904	Mitochondrial ribosomal protein L24_E2
AAEL012288-RA	171.965	479.504	491.049	861.599	1688.82	2078.63	768.746	147.095	109.073	157.492	sugar_transporter_E5
AAEL012302-RA	91.9909	104.791	193.199	184.923	632.883	532.86	368.55	124.073	112.13	121.656	conserved hypothetical protein
AAEL012334-RA	41.3345	52.1201	43.7048	40.9036	58.6082	134.628	40.4575	38.9932	38.5624	62.6005	AA_transpt_E1-7
AAEL012370-RA	294.106	108.293	283.809	1482.5	1278.73	884.684	296.965	150.698	180.426	179.839	brain chitinase and chia
AAEL012374-RA	50.9344	59.0183	82.2725	213.392	348.797	435.293	186.073	52.4148	47.1025	46.2983	conserved hypothetical protein
AAEL012417-RA	995.08	1314.29	1812.85	3791.55	7224.38	10639.2	3795.92	1242.39	1256.51	1413.51	conserved hypothetical protein
AAEL012428-RA	173.234	123.675	135.12	236.397	615.931	788.354	451.627	238.52	180.028	239.83	hypothetical protein
AAEL012456-RA	38.1791	40.8297	56.5175	43.1878	116.83	45.045	43.6778	40.935	56.084	40.1923	unkempt protein_E1
AAEL012480-RA	64.0813	84.6245	68.5906	71.6016	90.3006	123.377	97.9669	71.5916	75.2017	77.2664	sodium/calcium exchanger
AAEL012488-RA	39.5557	42.2831	41.3328	70.3707	42.7883	229.529	35.221	39.3259	41.0268	36.8213	hypothetical protein
AAEL012547-RA	63.4643	50.7457	49.2475	74.7259	148.969	103.41	68.1039	73.6431	62.9655	57.0987	lkb1 interacting protein
AAEL012548-RA	109.172	178.765	165.224	239.865	478.585	292.631	273.969	122.792	112.305	131.79	glycosylphosphatidylinositol-specific phospholipase C, putative
AAEL012563-RA	131.174	190.037	189.478	263.531	280.799	360.892	208.513	80.3746	108.859	78.2395	lumbrokinase-3(1) precursor, putative
AAEL012564-RA	99.2401	211.349	204.603	385.605	534.592	667.132	292.239	72.2374	80.8837	72.1607	lumbrokinase-3(1) precursor, putative
AAEL012585-RA	2041.31	2360.19	2538.65	4053.7	4286.71	5157.18	3146.04	822.913	2381.77	1287.8	60S ribosomal protein L7_E1+E2
AAEL012588-RA	874.452	837.222	861.204	1281.6	2224.93	2497.35	1538.9	1257.66	954	951.743	Hsp70-interacting protein, putative
AAEL012604-RA	59.6714	121.478	171.863	119.942	377.475	61.917	109.42	57.9948	71.5888	73.6353	hypothetical protein
AAEL012610-RA	1163.07	1234.18	1672.36	2259.24	2543.8	2501.58	1769.66	1466.8	2214.55	2042.48	conserved hypothetical protein
AAEL012640-RA	48.9245	62.6634	80.1248	61.7876	138.851	49.2783	69.8793	48.7248	53.8336	63.2839	conserved hypothetical protein	SGR|0011|VB|AAEL012640|NEUROPEPTIDE_LIKE_PRECURSOR2_NPP2|ORF; SGR|0011|VB|AAEL012640|NEUROPEPTIDE_LIKE_PRECURSOR2_NPP2|ORF; SGR|0011|VB|AAEL012640|NEUROPEPTIDE_LIKE_PRECURSOR2_NPP2|ORF; SGR|0011|VB|AAEL012640|NEUROPEPTIDE_LIKE_PRECURSOR2_NPP2|ORF; SGR|0011|VB|AAEL012640|NEUROPEPTIDE_LIKE_PRECURSOR2_NPP2|ORF; SGR|0011|VB|AAEL012640|NEUROPEPTIDE_LIKE_PRECURSOR2_NPP2|ORF;
AAEL012666-RA	522.02	714.425	732.036	1305.47	1212.32	768.742	480.434	267.067	542.279	278.093	phosphatidylethanolamine-binding protein
AAEL012671-RA	6765.83	5866.57	5727.88	9106.61	16963.4	18913.6	9667.17	12705.8	10596.7	7085.6	conserved hypothetical protein
AAEL012691-RA	55.5933	68.1375	59.2409	62.3424	50.9808	99.0672	70.0636	56.8045	56.2435	60.2638	sodium_channel_E1-6
AAEL012693-RA	415.803	233.078	682.013	800.402	952.864	575.3	178.483	162.55	106.514	105.063	tripartite motif protein
AAEL012709-RA	317.692	884.531	1742.61	2586.62	2690.47	3734.92	1368.08	308.881	270.002	253.379	conserved hypothetical protein
AAEL012711-RA	797.727	973.188	1593.32	3629.88	4407.14	2772.18	3155.2	1008.84	1113.97	717.932	trypsin, putative
AAEL012736-RA	930.399	1204.46	1368.32	2065.43	2612.44	3354.73	1830.25	417.416	867.096	519.779	Ribosomal protein L15_E1-E3
AAEL012806-RA	840.513	960.578	1101.31	1759.78	2730.02	2980.2	3161.77	1244.56	2092.24	866.743	conserved hypothetical protein
AAEL012847-RA	152.547	160.032	206.665	157.152	351.957	88.6851	198.927	184.503	255.001	171.463	AaegFOXO_E1-2
AAEL012870-RA	46.9833	54.5553	47.4199	155.543	67.5714	452.039	170.415	49.2469	42.7787	43.1756	conserved hypothetical protein
AAEL012917-RA	1005.56	960.726	952.088	1772.41	2329.51	2267.19	1365.86	766.31	874.916	678.86	conserved hypothetical protein
AAEL013000-RA	145.329	132.922	128.645	445.874	484.596	404.757	73.1096	97.3554	110.233	75.4681	conserved hypothetical protein
AAEL013037-RA	938.195	865.535	1176.93	1272.26	2300	3149.26	2005.06	468.553	787.297	726.598	conserved hypothetical protein
AAEL013141-RA	36.4028	37.9318	48.3038	39.0143	53.5691	304.651	43.0303	34.9967	34.9054	40.6787	MFS_transpt_E2
AAEL013159-RA	45.1723	47.5855	41.2811	48.5767	41.601	177.375	46.6251	46.4726	40.7531	37.2641	tartan
AAEL013170-RA	601.645	547.391	1084.15	2520.44	7228.74	6947.19	938.247	1434.77	3130.83	2652.99	phosphatidylcholine-sterol acyltransferase (lecithin-cholesterol acyltransferase)
AAEL013215-RA	57.1862	79.8827	79.059	72.7739	138.099	109.121	102.361	56.4011	61.6467	81.3734	ABC_transporter_E14+E15+E16+E17+E18+E19+E20
AAEL013216-RA	147.171	101.108	147.398	193.181	448.48	313.799	339.098	127.206	94.7147	163.078	conserved hypothetical protein
AAEL013218-RA	62.2931	59.8932	138.699	63.7871	354.589	87.7444	217.623	78.2692	58.6281	73.3312	_transporter_E1
AAEL013239-RA	77.2665	126.269	137.905	319.639	501.552	721.923	507.731	101.67	88.7015	67.0084	bone morphogenetic protein_E4
AAEL013253-RA	109.706	86.6124	148.261	121.175	270.082	66.338	181.71	111.177	82.7557	98.0914	40S ribosomal protein S3a_E3
AAEL013270-RA	143.742	94.5539	181.462	129.769	471.01	60.7473	260.01	109.42	76.3276	141.412	AaHR38_E2
AAEL013303-RA	76.4293	75.0933	70.8632	212.103	149.874	484.364	118.393	48.539	55.186	45.2242	conserved hypothetical protein
AAEL013309-RC	1939.38	2045.92	2558.74	3425.56	5200.48	6262.43	4109.83	2362.62	1556.45	1335.16	high-affinity copper uptake protein	AAEL013309-RA high-affinity copper uptake protein; AAEL013309-RB high-affinity copper uptake protein;;
AAEL013324-RA	66.816	93.4648	155.651	159.568	323.381	138.454	248.294	54.8791	53.6451	74.6959	high affinity nuclear juvenile hormone binding protein, putative
AAEL013407-RA	3136.93	3258.09	3324.25	4956.19	8612.33	9427.4	5612.01	4021.42	4901.23	3007.54	catalase
AAEL013441-RA	120.873	138.395	169.566	765.085	1128.02	581.739	655.844	188.557	241.988	161.179	leucine-rich transmembrane protein
AAEL013490-RA	959.924	4359.87	5380.49	8361.72	8245.05	7892.2	777.834	533.772	795.423	440.209	conserved hypothetical protein
AAEL013492-RA	3366.27	9071.84	11889.1	23152.7	50381.1	61191	17762.5	521.949	574.002	309.232	prophenoloxidase
AAEL013499-RA	117.094	124.507	104.762	304.971	493.503	920.02	344.345	68.283	64.8824	48.2323	prophenoloxidase
AAEL013563-RA	37.6148	41.9203	53.7169	79.6922	131.77	106.99	67.311	41.1262	39.6008	40.071	conserved hypothetical protein
AAEL013686-RA	259.211	429.428	528.392	751.044	1182.34	1490.45	563.911	352.805	263.2	292.504	conserved hypothetical protein
AAEL013723-RA	235.94	200.375	229.673	383.605	476.562	565.021	312.239	188.492	195.009	158.103	polypyrimidine tract binding protein
AAEL013728-RA	394.002	568.936	741.305	1017.14	1650.3	2023.6	1620.19	468.871	419.212	501.635	conserved hypothetical protein
AAEL013735-RA	158.665	101.053	210.449	711.218	1494.15	1996.03	646.065	174.386	129.833	187.998	conserved hypothetical protein
AAEL013740-RA	321.407	132.239	178.677	246.608	255.723	709.191	311.407	154.845	279.081	365.6	hypothetical protein
AAEL013746-RA	1341.98	1027.85	1288.79	1525.48	2329.31	2409.63	1649.34	1412.13	1093.46	1454.04	conserved hypothetical protein
AAEL013755-RA	433.601	352.884	693.228	1418.19	2095.17	1656.79	879.899	570.587	518.776	368.214	phosphorylase kinase, gamma
AAEL013770-RA	51.8103	89.3472	73.5828	61.4212	164.335	393.63	168.501	63.5361	83.1575	98.8327	zinc finger protein_E1
AAEL013771-RA	92.8258	65.4173	144.099	66.7898	315.511	48.4442	157.454	83.4969	50.8648	122.08	Mitochondrial ribosomal protein, L54, putative_E3
AAEL013785-RA	674.794	503.356	643.214	786.176	1587.35	1048.53	764.877	566.097	842.911	800.685	conserved hypothetical protein	AAEL013785-RB conserved hypothetical protein
AAEL013790-RA	45.7607	48.996	47.2036	40.4494	64.5817	83.6585	38.1556	46.4822	42.7788	70.7714	Mitochondrial ribosomal protein, L50, putative_E3
AAEL013811-RA	419.14	544.3	552.129	756.397	1166.88	1449.79	1001.75	601.001	641.341	393.721	neuropathy target esterase/swiss cheese(d.melanogaster)
AAEL013879-RA	298.712	467.032	502.203	446.982	842.036	955.348	903.655	447.467	434.665	442.299	conserved hypothetical protein
AAEL013881-RA	44.4414	53.6996	50.6786	44.8717	81.7965	164.498	76.0444	47.9342	67.5865	52.4157	calcium_transporter_E3
AAEL013882-RA	1224.8	1255.07	1364.18	874.886	9555.09	15312.1	6543.92	939.096	1087.5	1684.79	tkr
AAEL013890-RA	1627.17	1380.07	1532.98	3117.39	2782.99	3009.76	2796.23	1759.3	2168.93	1791.28	26S proteasome non-atpase regulatory subunit
AAEL013894-RA	122.681	125.751	120.02	186.961	393.643	321.019	205.775	97.189	113.151	68.8842	hypothetical protein
AAEL013915-RA	74.3723	64.0612	70.2804	147.804	778.742	900.207	211.146	78.088	62.724	83.9559	AA_transpt_E1-3
AAEL013935-RA	1044.66	861.096	1218.45	1643.96	2628.07	2936.81	2344.47	861.106	897.454	642.822	conserved hypothetical protein
AAEL013944-RA	144.434	195.066	170.276	237.425	702.679	702.41	109.208	283.525	205.576	225.697	hypothetical protein
AAEL013946-RA	618.614	729.399	693.251	1057.94	2427.47	2624.07	439.27	1465.6	858.48	1225.93	conserved hypothetical protein
AAEL013949-RA	70.7741	203.973	89.0599	113.068	279.257	329.77	55.8675	117.014	74.0485	98.7538	hypothetical protein
AAEL013980-RA	1876.01	1816.17	2347.81	4820.92	4603.83	4700.87	3065.11	1874.53	2229.89	2538.63	glutaredoxin, putative
AAEL013980-RB	2629.33	2400.51	3136.3	6492.93	5671.55	5917.35	3897.61	2529.25	2808.28	3691.23	glutaredoxin, putative
AAEL013994-RA	833.316	880.232	1249.16	1314.31	1732.19	1812.29	1583.71	1073.37	746.097	1127.76	conserved hypothetical protein
AAEL014019-RA	132.611	354.114	535.788	1974.9	2980.37	2705.17	2183.39	552.217	297.113	149.753	cytochrome P450
AAEL014069-RA	140.74	216.345	291.792	212.11	608.45	215.382	399.176	134.237	123.652	136.239	catrin, putative
AAEL014093-RA	150.372	198.098	157.218	281.169	400.575	567.623	382.266	196.179	154.783	109.932	gtpase-activating protein gyp2
AAEL014097-RA	406.727	490	438.94	665.7	1323.24	1567.37	1145.63	611.88	520.566	436.756	hypothetical protein
AAEL014125-RA	69.0094	93.8271	112.547	88.4135	175.934	95.2092	107.609	69.1572	83.9605	55.741	nk homeobox protein
AAEL014134-RA	50.4607	58.6286	59.7231	110.229	296.927	533.429	227.198	61.9422	58.7393	59.3528	kinesin heavy chain
AAEL014139-RA	871.901	750.88	617.613	678.499	1111.8	1550.62	959.071	415.544	585.885	405.207	proacrosin, putative
AAEL014158-RA	223.715	274.846	366.199	527.493	514.443	418.996	278.434	235.275	150.252	196.611	hypothetical protein
AAEL014162-RA	59.2155	60.8987	113.506	68.7543	171.393	51.0374	74.0383	70.5715	54.1332	65.9625	potassium_transpt_E4
AAEL014199-RA	2230.06	11221.7	10579.6	21294.9	38479.4	29729.1	16186.5	4575.91	4290.54	3979.8	dihydropyrimidine dehydrogenase
AAEL014207-RA	62.8525	110.996	64.4343	94.7611	69.7824	156.195	47.634	65.0471	59.3741	65.9466	sugar_transporter_E4
AAEL014245-RA	74.1395	116.966	148.115	190.512	315.44	407.463	214.856	70.6742	73.0857	58.8906	hypothetical protein
AAEL014258-RA	79.5509	117.483	175.653	141.584	391.826	76.9337	328.493	62.6428	64.9488	87.7659	AA_transpt_E6
AAEL014272-RA	956.036	642.301	829.63	1032.62	2039.79	1513.34	952.223	825.531	1155.81	1233.09	molybdopterin cofactor sulfurase (mosc)
AAEL014284-RA	34.505	40.9339	40.8867	77.4136	80.0446	87.7743	40.4571	36.7871	40.0879	41.2197	AaegFOXD_E2
AAEL014294-RA	1108.9	1244.94	1374.39	1865.13	3127.82	4229.58	1072.53	1144.08	1107.89	1075.27	conserved hypothetical protein
AAEL014319-RA	1438.53	1892.35	2401.02	2737.98	3967.06	4362.63	3156.82	2088.62	2223.42	1450.06	hypothetical protein
AAEL014335-RA	1202.26	1186.31	1578.53	2762.22	4518.81	5567.46	2139.67	2113.49	4417.43	3540.63	hypothetical protein
AAEL014346-RA	192.892	122.954	198.657	829.059	1063.92	731.184	172.965	251.846	256.75	259.467	hypothetical protein
AAEL014351-RA	77.898	74.4792	137.888	434.046	410.713	263.677	213.193	94.7084	141.101	106.608	hypothetical protein
AAEL014352-RA	529.533	286.841	425.755	1947.59	2829.74	2383.96	477.956	748.383	782.64	692.884	conserved hypothetical protein
AAEL014368-RA	401.297	497.048	629.862	728.824	1147.94	1699.28	897.033	212.755	338.698	332.399	sap18
AAEL014428-RA	78.801	95.1827	338.199	842.105	1800.01	3112.77	1361.88	81.8865	65.9211	66.8644	ABC_transporter_E1+E2+E3
AAEL014435-RA	165.972	194.287	358.935	518.553	830.851	1375.1	563.595	112.297	86.2078	106.853	Juvenile hormone-inducible protein, putative
AAEL014486-RA	251.132	238.046	238.886	761.305	1105.27	939.277	200.13	136.704	183.371	126.327	conserved hypothetical protein
AAEL014527-RA	35.2737	39.5867	41.4845	51.7323	44.2313	96.4815	41.7163	38.6661	36.9422	37.7075	sodium_channel_E1
AAEL014530-RA	543.66	392.544	694.179	1415.7	1931.5	1586.21	872.309	593.068	630.663	495.784	hypothetical protein
AAEL014635-RA	74.3696	108.118	127.398	169.311	472.421	530.115	210.515	54.5801	59.1111	56.8227	engrailed
AAEL014636-RA	442.317	115.459	219.086	444.669	842.161	738.3	178.426	459.189	384.306	496.038	rhogtpase		AAEL003587-RA rhogtpase
AAEL014655-RA	136.106	207.806	370.095	307.66	795.382	336.031	403.948	89.6821	99.3788	139.787	hypothetical protein
AAEL014663-RA	1406.89	1136.58	1203.44	2212.88	2615.79	2643.15	954.114	713.695	2016.78	1433.72	amp dependent coa ligase
AAEL014664-RA	751.912	919.765	1039.88	2722.13	3894.64	2887.38	529.095	583.47	2653.25	942.534	amp dependent coa ligase
AAEL014671-RA	1083.11	1232.7	1563.24	2454.63	5737	9011.23	5752.73	1842.79	1423.34	2058.52	protease S51 alpha-aspartyl dipeptidase
AAEL014693-RA	931.506	340.378	621.188	1325.07	2088.16	2024.03	273.914	735.626	617.551	786.628	conserved hypothetical protein		AAEL013955-RA conserved hypothetical protein
AAEL014714-RA	631.72	753.446	717.277	1761.57	4518.04	6649.59	5263.63	288.57	366.035	426.324	conserved hypothetical protein
AAEL014727-RA	71.5075	79.5511	122.902	134.979	559.559	761.495	368.592	48.0035	56.3456	52.7837	conserved hypothetical protein
AAEL014762-RA	8201.29	6266.64	12965.4	19786.6	31621.8	32361.4	14401.4	8229.91	9298.98	6680.29	Zinc_transpt_E2
AAEL014840-RA	232.094	106.658	134.45	927.099	1609.25	1733.46	1867.38	78.5171	80.7624	79.8262	short-chain dehydrogenase
AAEL014846-RA	1221	1214.17	1741.93	4188.67	6161.45	6106.52	4592.04	1453.98	1085.02	549.772	innexin
AAEL014847-RA	2902.9	3703.66	3779.01	5252.37	8918.91	7830.35	4903.86	3263.95	3144.78	1478.97	innexin
AAEL014925-RA	45.1397	63.3842	70.6518	115.161	259.945	350.861	123.925	49.6865	52.2799	60.5507	conserved hypothetical protein
AAEL014951-RA	98.3423	142.698	186.188	257.821	630.086	773.186	274.174	72.9805	81.6368	79.775	Sp?tzle 3B (Spz3B)
AAEL014971-RA	399.175	287.255	339.921	365.635	874.181	786.541	360.532	696.441	526.007	644.759	blastoderm specific protein 25d
AAEL015010-RA	3968.77	1497.12	926.49	4673.92	8275.66	6923.74	3316.5	3909.32	3665.24	1505.85	acetyl-coa synthetase
AAEL015019-RA	375.211	267.659	239.638	1028.47	1611.46	1083.86	903.098	232.217	167.944	160.045	hypothetical protein
AAEL015091-RA	93.0672	119.452	210.663	361.66	599.482	653.911	424.99	70.1398	92.1092	88.5053	hypothetical protein
AAEL015116-RA	552.628	816.132	684.848	1970.32	3765.45	5158.47	1909.45	198.217	239.974	126.795	prophenoloxidase	AAEL013498-RA prophenoloxidase
AAEL015124-RA	143.49	155.165	157.661	409.393	842.372	811.813	722.585	185.85	158.189	133.846	hypothetical protein
AAEL015260-RA	3873.92	3650.21	4615.61	9529.1	14830.9	19624.9	7467.23	5233.3	4865.67	5648.58	phosphatidylethanolamine-binding protein, putative
AAEL015291-RA	185.358	155.2	179.83	651.3	2145.05	2142.67	443.511	183.818	149.005	147.115	symbol, putative	AAEL007315-RA symbol, putative
AAEL015370-RA	162.633	405.727	627.727	2347.87	3620.74	3184.14	2649.77	675.622	350.188	202.991	cytochrome P450
AAEL015386-RA	59.7948	82.6434	119.03	70.6885	312.81	88.0038	137.339	65.1474	60.8217	69.3842	dipeptidyl-peptidase_E2
AAEL015417-RA	615.838	934.558	1630.02	6013.84	12894.9	12263.2	3557.88	673.722	547.762	522.33	zinc carboxypeptidase
AAEL015427-RA	57.5275	66.777	77.5832	159.217	265.765	366.445	228.303	56.5329	54.545	46.7627	hypothetical protein
AAEL015443-RA	55.9394	61.4692	57.4962	52.4073	75.3576	191.098	74.2305	55.7107	63.3072	61.0984	forkhead protein/ forkhead protein domain
AAEL015445-RA	1088.13	1755.76	2376.35	3260.18	5058.63	5769.88	4194.59	1897.72	2924.5	1356.18	cysteine dioxygenase
AAEL015474-RA	129.597	59.6975	162.872	770.853	740.53	357.047	51.9767	43.198	37.7816	41.2768	conserved hypothetical protein		AAEL010130-RA Pupal cuticle protein, putative
AAEL015484-RA	140.024	265.444	300.37	444.303	915.398	1208.03	801.933	131.678	123.693	145.064	mitochondrial oxodicarboxylate carrier
AAEL015599-RA	100.966	170.753	172.83	453.346	1112.05	1461.62	1113.84	153.545	319.98	199.925	conserved hypothetical protein
AAEL015606-RA	88.3569	870.337	5199.08	22546.1	44006.4	46733.5	21107	536.782	237.507	250.235	hypothetical protein
AAEL015655-RA	577.217	1124	946.73	946.88	1119.6	1443.16	1333.79	432.094	571.496	308.736	AaegCYP302a1b_E7
AAEL015657-RA	271.338	304.772	436.453	1155.76	2172.47	2415.68	734.991	227.483	357.456	322.088	conserved hypothetical protein
AAEL015663-RA	423.78	533.625	691.307	1800.23	2403.63	1813.59	1543.61	734.052	432.034	294.089	cytochrome P450
Average Expression	1026.67	1509.97	2284.5	3924.75	5621.83	6031.4	3506.89	1600.67	1619.23	1369.05
Normalized to 72 PE	1	1.47075	2.22516	3.82281	5.47581	5.87474	3.4158	1.55909	1.57717	1.33349
LOG2	0	0.556549	1.15391	1.93463	2.45307	2.55452	1.77222	0.640709	0.657338	0.415203
Late-Mid Genes (LMGs)
Target id	72 PE	3 PBM	6 PBM	12 PBM	18 PBM	24 PBM	36 PBM	48 PBM	60 PBM	72 PBM	Gene Name	Secondary hit
AAEL000037-RA	14033.2	14657.1	9787.6	10700	13597.1	20235.3	63853.1	32652.5	34643.5	21585	serine protease
AAEL000059-RA	19124.2	17476	9412.32	9400.34	12416.4	17851.3	41704.3	36818.6	30368.1	20845.4	proacrosin, putative
AAEL000159-RA	1759.91	1735.66	1831.11	2293.22	2460.1	2494.52	5097.72	3520.59	3434.55	2237.77	nipsnap
AAEL000227-RA	2601.09	2389.71	2652.39	6381.39	10588.3	10406.1	13600.7	3964.45	5203.42	2948.65	epithelial membrane protein
AAEL000234-RA	2125.71	1869.61	2449.67	5850.99	8822.76	9479.8	14296.8	7331.2	9251.11	5450.32	antigen CD36, putative
AAEL000268-RA	86.3641	59.3475	60.5148	89.612	68.0075	91.0796	156.675	118.481	70.0599	71.276	lipase
AAEL000277-RA	8680.73	8551.12	6694.78	7354.25	10538.6	12547.6	18409.9	5455.64	10144.5	4899.37	conserved hypothetical protein
AAEL000395-RA	50.0349	43.9334	41.0859	44.9874	51.5745	43.7657	291.522	50.1792	52.1028	46.3982	AaUSP-A_EA1
AAEL000445-RB	2811.31	3368.53	2097.57	2354.1	3519.57	4545.9	8990.12	3060.35	5008.11	3097.1	conserved hypothetical protein	AAEL000445-RA conserved hypothetical protein
AAEL000450-RA	914.442	1379.86	1298.41	1696.03	2892.5	3477.07	3785.12	1194.76	2065.37	1035.06	RAS_GTPase_ACTIVATING_PROTEIN_ORF
AAEL000485-RA	3015.48	1320.59	1203.5	1282.51	2451.76	3041.21	5171.1	2893.37	2646.6	2753.98	paramyosin, putative
AAEL000567-RA	5040.59	2129.1	4552.91	4881.67	6898.26	7365.26	47765.7	13054.2	8391.55	2763.14	sugar_transporter_E4-5
AAEL000581-RA	203.256	283.796	219.647	341.225	364.272	289.168	863.656	386.06	379.53	201.429	conserved hypothetical protein
AAEL000629-RA	391.836	613.008	1007.87	640.709	378.327	400.649	3818.4	3317.44	2654.62	868.693	adenylate kinase 3,	AAEL012710-RB conserved hypothetical protein
AAEL000640-RA	5393.08	3434.3	2843.56	2033.58	1191.23	1335.74	9465.6	7522.76	5278.79	3108.2	conserved hypothetical protein
AAEL000666-RA	661.632	460.167	403.177	355.89	523.823	964.914	1031.33	444.476	548.964	650.543	pmp22 peroxisomal membrane protein, putative	AAEL000666-RB pmp22 peroxisomal membrane protein, putative
AAEL000668-RA	16974	7458.87	5327.12	4891.07	7778.84	10493.4	33240.2	13090.5	12605	10580.9	conserved hypothetical protein
AAEL000676-RA	212.145	123.413	131.082	162.416	109.457	160.802	559.472	205.645	192.174	214.258	hypothetical protein
AAEL000703-RA	2508.12	570.686	1020.21	2737.56	7903.88	7634.92	32598.7	22553.1	12430.9	5168.96	glycogen phosphorylase
AAEL000705-RA	453.414	526.103	547.965	761.72	870.777	657.527	2461.35	977.604	1748.01	805.05	steroid dehydrogenase
AAEL000711-RA	872.546	1068.32	915.148	1053.7	1616.2	3186.27	3618.78	2010.9	1340.5	785.502	hypothetical protein	AAEL000711-RC hypothetical protein; AAEL000711-RB hypothetical protein;;
AAEL000728-RA	249.372	270.915	193.803	193.084	97.1741	223.257	363.08	291.975	342.799	192.279	Ribosomal protein S6 kinase_E4
AAEL000806-RA	121.773	107.385	93.379	100.686	44.516	53.0511	165.095	113.978	116.096	136.253	hypothetical protein
AAEL000816-RA	6124.05	3746.85	3218.29	2531.35	2377.08	2771.18	11405.1	6860.28	5467.97	3608.95	conserved hypothetical protein
AAEL000829-RA	2625.29	2032.36	1306.22	1066.29	1404.86	2067.34	4789.94	2317.03	4026.98	2164.95	dimethylaniline monooxygenase
AAEL001128-RA	2041.92	2039.67	1860.99	720.115	2264.68	3605.33	44463.4	37025.9	9322.19	2341.29	amp dependent coa ligase
AAEL001190-RA	8081.61	4056.91	4760.37	6642.77	10396.4	12454.2	20449.9	12108.8	12092.2	13064.3	conserved hypothetical protein
AAEL001204-RA	6331.78	6313.56	5388.6	4896.69	8523.65	9579.13	23981.6	14814.3	10502.8	9798.89	sterol o-acyltransferase
AAEL001289-RA	7631.24	5303.96	6260.27	2668.46	1316.69	1025.81	9309.06	4496.53	2718.99	1907.15	permease, putative	threonine dehydratase/deaminase
AAEL001325-RB	855.89	1468.26	1044.57	1066.69	1239.59	1931	7344.75	3097.55	3159.42	1510.23	conserved hypothetical protein	AAEL001325-RA conserved hypothetical protein
AAEL001490-RA	179.526	344.519	197.677	185.368	201.772	253.738	651.707	208.634	475.814	290.049	acylphosphatase, putative
AAEL001498-RA	206.846	262.969	100.857	84.7223	669.254	2421.74	5800.9	200.725	363.465	196.656	hypothetical protein
AAEL001538-RA	353.325	104.209	187.291	193.702	297.812	539.226	826.251	523.523	308.993	753.002	conserved hypothetical protein
AAEL001564-RA	118.539	112.201	117.986	101.513	109.149	62.7933	338.621	250.989	264.41	228.047	conserved hypothetical protein
AAEL001594-RA	970.109	569.191	1170.13	3653.16	8862.3	10834.2	20995.6	7906.7	10208.3	2277.98	conserved hypothetical protein
AAEL001816-RA	207.622	344.746	320.543	365.544	199.677	450.743	2858.39	574.264	459.323	403.802	glucosyl/glucuronosyl transferases
AAEL001882-RA	698.642	1214.25	943.149	2101.09	2251.47	1627.04	6070.04	1080.71	4190.3	1224.78	conserved hypothetical protein
AAEL001892-RA	2172.13	3416.44	3688.47	5520.51	9421.72	12969.5	13212.7	4815.5	6223.64	2947.42	conserved hypothetical protein	AAEL001892-RC conserved hypothetical protein
AAEL001892-RB	1311.96	2304.93	2568.13	4250.83	8515.9	12776	12150.8	3901.94	5331.87	3417.59	conserved hypothetical protein
AAEL001920-RA	139.363	123.683	81.8738	124.079	102.816	230.962	348.545	139.767	176.09	135.627	conserved hypothetical protein
AAEL001986-RA	204.77	140.798	144.552	233.719	95.4293	97.7244	330.192	247.227	185.702	184.405	kinesin-like protein KIF1B
AAEL002005-RA	242.935	461.024	402.24	434.177	426.519	1027.45	1370.62	1112.53	909.2	508.461	cytochrome P450
AAEL002042-RA	803.661	983.403	742.025	605.344	805.521	1574.65	5455.27	1521.61	2314.7	896.636	deoxyribonuclease I, putative	AAEL013029-RA deoxyribonuclease I, putative
AAEL002062-RA	71.7186	89.7296	51.8107	169.757	55.1371	269.916	341.553	98.1103	129.338	73.1689	AaFTZ-F1_Ecom1+Ecom2+Ecom3
[truncated: 1,956 more rows]
